# Supplementary material
Source: PubMed Central journal article supplement (PMC2886281)
Supplement: NIHMS200843-supplement-Suppl__Doc_2-5.pdf [file NIHMS200843-supplement-Suppl__Doc_2-5.pdf]

**Supplementary doc 2: All peptides with Peptide Prophet score:**

| protein     | probability | ions   | peptide                                  | assumedc<br>harge | precursor<br>neutral mass |
|-------------|-------------|--------|------------------------------------------|-------------------|---------------------------|
| IPI00000041 | 0.9896      | 14/ 16 | K.TC[160.14]LLIVFSK.<br>D                | 2                 | 1080.992                  |
| IPI00000816 | 0.987       | 17/ 20 | K.EALQDVEDENQ.-<br>K.VAGM[147.19]DVELT   | 2                 | 1289.692                  |
| IPI00000816 | 0.9893      | 18/ 24 | VEER.N                                   | 2                 | 1463.292                  |
| IPI00000816 | 0.9935      | 16/ 20 | R.YLAEFATGNDR.K                          | 2                 | 1257.492                  |
| IPI00000874 | 0.994       | 15/ 18 | R.TIAQDYGVLK.A                           | 2                 | 1107.192                  |
| IPI00000874 | 0.9965      | 16/ 18 | R.LVQAFQFTDK.H                           | 2                 | 1197.892                  |
| IPI00001437 | 0.9149      | 24/ 72 | K.RISHM[147.19]PSRP<br>ELSAVATDLR.K      | 3                 | 2152.492                  |
| IPI00001618 | 0.9106      | 15/ 20 | K.LQLWDTAGQER.F                          | 2                 | 1315.892                  |
| IPI00002818 | 0.999       | 18/ 20 | R.LLC[160.14]GATLIAP<br>R.W              | 2                 | 1185.892                  |
| IPI00002856 | 0.9801      | 15/ 18 | K.ILVDISNNLK.I                           | 2                 | 1128.892                  |
| IPI00002856 | 0.9905      | 18/ 30 | R.NLGLTPM[147.19]DQ<br>GSLM[147.19]AAK.E | 2                 | 1680.092                  |
| IPI00003362 | 0.9856      | 15/ 34 | R.GVPQIEVTFEIDVNGIL<br>R.V               | 2                 | 2001.692                  |
| IPI00003865 | 0.9766      | 12/ 20 | K.NSLESYAFNM[147.19]<br>]K.A             | 2                 | 1319.592                  |
| IPI00003865 | 0.9997      | 19/ 24 | R.TTPSYVAFTDTER.L                        | 2                 | 1487.392                  |
| IPI00003935 | 0.9998      | 21/ 28 | K.AM[147.19]GIM[147.<br>19]NSFVNDIFER.I  | 2                 | 1775.592                  |
| IPI00004358 | 0.9983      | 15/ 22 | R.VLYPNDNFFEGK.E                         | 2                 | 1442.692                  |
| IPI00004550 | 0.9981      | 11/ 12 | R.LAADDFR.L                              | 2                 | 806.692                   |
| IPI00004573 | 0.9994      | 21/ 30 | R.GGC[160.14]ITLISSE<br>GYVSSK.Y         | 2                 | 1658.592                  |
| IPI00004573 | 0.9912      | 28/ 68 | R.GSVTFHC[160.14]AL<br>GPEVANVAK.F       | 3                 | 1858.392                  |
| IPI00004573 | 1           | 19/ 20 | R.LVSLTLNLVTR.A                          | 2                 | 1228.492                  |
| IPI00004573 | 0.9874      | 11/ 16 | R.TVTINC[160.14]PFK.<br>T                | 2                 | 1079.592                  |
| IPI00004573 | 0.9992      | 22/ 34 | R.GSVTFHC[160.14]AL<br>GPEVANVAK.F       | 2                 | 1856.792                  |
| IPI00004573 | 0.9996      | 29/ 68 | R.GSVTFHC[160.14]AL<br>GPEVANVAK.F       | 3                 | 1857.492                  |
| IPI00004573 | 0.9991      | 17/ 20 | R.ADEGWYWC[160.14]<br>GVK.Q              | 2                 | 1370.592                  |
| IPI00004573 | 1           | 19/ 20 | R.LVSLTLNLVTR.A                          | 2                 | 1229.092                  |
| IPI00005719 | 0.9724      | 18/ 20 | K.LLLIGDSGVGK.S                          | 2                 | 1071.092                  |
| IPI00005721 | 0.9411      | 7/ 10  | R.LWAF[C[160.14]C[160.<br>.14].-         | 1                 | 857.392                   |
| IPI00005721 | 0.9047      | 7/ 10  | R.LWAF[C[160.14]C[160.<br>.14].-         | 1                 | 855.392                   |

|             |        |        |                                                   |   |          |
|-------------|--------|--------|---------------------------------------------------|---|----------|
| IPI00005721 | 0.9411 | 7/ 10  | R.LWAF[C[160.14]C[160.14].-                       | 1 | 857.392  |
| IPI00005721 | 0.9981 | 14/ 16 | R.YGTC[160.14]IYQGR.L                             | 2 | 1116.992 |
| IPI00005721 | 0.9997 | 15/ 16 | R.IPAC[160.14]IAGER.R                             | 2 | 986.492  |
| IPI00005721 | 0.9747 | 7/ 10  | R.LWAF[C[160.14]C[160.14].-                       | 1 | 857.392  |
| IPI00005721 | 0.9214 | 7/ 10  | R.LWAF[C[160.14]C[160.14].-                       | 1 | 855.392  |
| IPI00005859 | 0.9754 | 12/ 12 | K.FASFIDK.V                                       | 2 | 826.792  |
| IPI00005859 | 0.9722 | 15/ 20 | R.NLDLDSIIAEV.K                                   | 2 | 1201.392 |
| IPI00005859 | 0.9996 | 19/ 22 | R.NLDLDSIIAEVK.A                                  | 2 | 1329.292 |
| IPI00006114 | 0.9955 | 28/112 | R.SSM[147.19]SPTTNV<br>LLSPLSVATALSALSGLAE<br>Q.R | 3 | 2862.292 |
| IPI00006690 | 0.9992 | 16/ 18 | R.IPC[160.14]FLAGDTR<br>.S                        | 2 | 1150.492 |
| IPI00006690 | 0.9916 | 14/ 18 | R.IPC[160.14]FLAGDTR<br>.S<br>-                   | 2 | 1150.492 |
| IPI00007047 | 0.9992 | 35/ 80 | .M[147.19]LTELEKALNS<br>IIDVYHKYSL.I              | 3 | 2499.692 |
| IPI00007047 | 0.9994 | 17/ 20 | K.LLETEC[160.14]PQYI<br>R.K                       | 2 | 1420.992 |
| IPI00007047 | 0.9991 | 17/ 20 | K.LLETEC[160.14]PQYI<br>R.K                       | 2 | 1423.692 |
| IPI00007047 | 0.9913 | 16/ 20 | K.LLETEC[160.14]PQY<br>I.R                        | 2 | 1393.492 |
| IPI00007047 | 0.9841 | 14/ 20 | K.LLETEC[160.14]PQYI<br>R.K                       | 2 | 1422.492 |
| IPI00007047 | 0.988  | 16/ 20 | K.LLETEC[160.14]PQYI<br>R.K                       | 2 | 1422.592 |
| IPI00007047 | 0.9993 | 16/ 20 | K.LLETEC[160.14]PQYI<br>R.K                       | 2 | 1422.992 |
| IPI00007047 | 0.9308 | 19/ 40 | K.ALNSIIDVYHK.Y                                   | 3 | 1273.592 |
| IPI00007047 | 0.9989 | 17/ 20 | K.ALNSIIDVYHK.Y<br>K.LLETEC[160.14]PQYI           | 2 | 1271.692 |
| IPI00007047 | 0.9981 | 16/ 20 | R.K<br>R.VTWDSTFC[160.14]A                        | 2 | 1421.392 |
| IPI00007058 | 0.9895 | 17/ 24 | VNPK.F                                            | 2 | 1524.692 |
| IPI00007221 | 0.9998 | 18/ 20 | K.FSIEGSYQLEK.V                                   | 2 | 1299.892 |
| IPI00007221 | 0.9992 | 17/ 20 | K.FSIEGSYQLEK.V<br>K.GTQEQDFYVTSETVVR             | 2 | 1302.992 |
| IPI00007221 | 0.9999 | 24/ 30 | .V                                                | 2 | 1858.692 |
| IPI00007221 | 0.9971 | 15/ 22 | R.AAAATGTIFTR.S                                   | 2 | 1226.692 |
| IPI00007221 | 0.9941 | 16/ 18 | I.VDNNILFLGK.V<br>K.M[147.19]QILEGLGL             | 2 | 1132.892 |
| IPI00007221 | 0.9991 | 22/ 24 | NLQK.S                                            | 2 | 1472.292 |

|             |        |        |                                                                                       |   |          |
|-------------|--------|--------|---------------------------------------------------------------------------------------|---|----------|
| IPI00007221 | 0.9387 | 15/ 24 | R.GFQQLLQELNQPR.D                                                                     | 2 | 1571.992 |
| IPI00007221 | 0.9944 | 37/132 | R.ALASAAPSQNIFFSPVS<br>ISM[147.19]SLAM[147.<br>19]LSLGAGSSTK.M<br>K.M[147.19]QILEGLGL | 3 | 3375.992 |
| IPI00007221 | 0.9906 | 21/ 24 | NLQK.S                                                                                | 2 | 1472.992 |
| IPI00007244 | 0.9738 | 13/ 18 | R.QALAQISLPR.I                                                                        | 2 | 1096.892 |
| IPI00007244 | 0.9928 | 19/ 22 | R.VVLEGGIDPILR.G                                                                      | 2 | 1280.692 |
| IPI00007244 | 0.9986 | 16/ 18 | R.QALAQISLPR.I                                                                        | 2 | 1096.092 |
| IPI00007244 | 0.9594 | 16/ 22 | R.VVLEGGIDPILR.G<br>R.IGLDLPALNM[147.19]                                              | 2 | 1280.792 |
| IPI00007244 | 0.9917 | 16/ 22 | QR.S<br>A.WPTAEIAVM[147.19]                                                           | 2 | 1356.792 |
| IPI00007247 | 0.9372 | 14/ 22 | GAK.G                                                                                 | 2 | 1290.792 |
| IPI00007752 | 0.9908 | 19/ 22 | R.INVYYNEATGGK.Y<br>K.EVDEQM[147.19]LNV                                               | 2 | 1327.592 |
| IPI00007752 | 0.984  | 17/ 22 | QNK.N<br>R.EIVHLQAGQC[160.14                                                          | 2 | 1461.892 |
| IPI00007752 | 0.9764 | 35/ 64 | ]GNQIGAK.F<br>R.DYQELM[147.19]NVK                                                     | 3 | 1824.292 |
| IPI00008359 | 0.9954 | 14/ 16 | .L                                                                                    | 2 | 1155.292 |
| IPI00009030 | 0.9958 | 13/ 14 | R.IPLNDLFR.C                                                                          | 2 | 987.392  |
| IPI00009030 | 0.9836 | 13/ 14 | R.IPLNDLFR.C                                                                          | 2 | 987.592  |
| IPI00009650 | 0.9302 | 15/ 20 | R.GLSTESILIPR.Q                                                                       | 2 | 1185.092 |
| IPI00009650 | 0.997  | 17/ 20 | R.GLSTESILIPR.Q                                                                       | 2 | 1184.892 |
| IPI00009865 | 0.903  | 15/ 22 | R.SQYEQLAEQNRK.D                                                                      | 2 | 1491.992 |
| IPI00009865 | 0.9635 | 15/ 22 | R.SQYEQLAEQNRK.D                                                                      | 2 | 1495.292 |
| IPI00009865 | 0.9981 | 17/ 20 | R.SQYEQLAEQNR.K                                                                       | 2 | 1365.492 |
| IPI00009865 | 0.9466 | 16/ 20 | R.SQYEQLAEQNR.K                                                                       | 2 | 1366.192 |
| IPI00009865 | 0.9855 | 15/ 16 | R.VLDELTLTK.A                                                                         | 2 | 1032.392 |
| IPI00009865 | 0.9948 | 16/ 20 | R.SQYEQLAEQNR.K                                                                       | 2 | 1364.592 |
| IPI00009865 | 0.998  | 17/ 20 | R.SQYEQLAEQNR.K                                                                       | 2 | 1365.392 |
| IPI00009865 | 0.9983 | 13/ 14 | K.YENEVALR.Q                                                                          | 2 | 992.892  |
| IPI00009865 | 0.9937 | 15/ 16 | R.LENEIQTYR.S                                                                         | 2 | 1166.592 |
| IPI00009865 | 0.9999 | 18/ 22 | R.ALEESNYELEGK.I<br>L.GGGFSSGGFSSGGSFS                                                | 2 | 1381.292 |
| IPI00009865 | 0.9974 | 23/ 30 | R.G                                                                                   | 2 | 1449.492 |
| IPI00009865 | 0.9757 | 21/ 24 | K.QSLEASLAETEGR.Y<br>K.GSLGGFSSGGFSSGG                                                | 2 | 1389.992 |
| IPI00009865 | 0.99   | 25/ 36 | SFSR.G                                                                                | 2 | 1707.492 |
| IPI00009865 | 0.9523 | 18/ 22 | R.ALEESNYELEGK.I                                                                      | 2 | 1382.192 |
| IPI00009865 | 0.9988 | 19/ 24 | K.QSLEASLAETEGR.Y                                                                     | 2 | 1390.592 |
| IPI00009865 | 0.998  | 18/ 22 | R.ALEESNYELEGK.I<br>R.NVQALEIELQSQLALK.                                               | 2 | 1380.892 |
| IPI00009865 | 0.9988 | 23/ 30 | Q<br>R.NVQALEIELQSQLALK.                                                              | 2 | 1798.292 |
| IPI00009865 | 0.9782 | 33/ 60 | Q                                                                                     | 3 | 1797.692 |

|             |        |        |                      |   |          |
|-------------|--------|--------|----------------------|---|----------|
|             |        |        | K.NQILNLTTDNANILLQI  |   |          |
| IPI00009865 | 0.9965 | 28/ 38 | DNA.R                | 2 | 2211.892 |
| IPI00009866 | 0.9848 | 15/ 16 | R.LEQEIATYR.S        | 2 | 1122.292 |
| IPI00009866 | 0.9986 | 19/ 22 | R.ALEEANADLEVK.I     | 2 | 1300.592 |
|             |        |        | K.VDALM[147.19]DEIN  |   |          |
| IPI00009867 | 0.9999 | 16/ 22 | FM[147.19]K.M        | 2 | 1457.592 |
|             |        |        | R.TTAENEFVM[147.19]L |   |          |
| IPI00009867 | 0.9948 | 15/ 20 | K.K                  | 2 | 1298.192 |
|             |        |        | R.GLGVGFGSGGGSSSS    |   |          |
| IPI00009867 | 0.9959 | 25/ 32 | VK.F                 | 2 | 1440.292 |
| IPI00009938 | 0.9944 | 19/ 24 | K.TIIVTELSPVVAK.P    | 2 | 1370.692 |
|             |        |        | K.FLM[147.19]ANGQLV  |   |          |
| IPI00010154 | 0.9142 | 15/ 18 | K.M                  | 2 | 1137.492 |
| IPI00010491 | 0.9999 | 16/ 18 | K.FITTVGIDFR.E       | 2 | 1169.092 |
| IPI00010491 | 0.9998 | 15/ 18 | K.FITTVGIDFR.E       | 2 | 1168.892 |
| IPI00010491 | 0.9856 | 17/ 18 | K.FITTVGIDFR.E       | 2 | 1169.692 |
|             |        |        | R.TGPAATTLPDGAAAES   |   |          |
| IPI00010796 | 0.9911 | 33/116 | LVESSEVAVIGFFK.D     | 3 | 2937.392 |
|             |        |        | R.TGPAATTLPDGAAAES   |   |          |
| IPI00010796 | 0.9968 | 33/116 | LVESSEVAVIGFFK.D     | 3 | 2936.192 |
|             |        |        | R.TGPAATTLPDGAAAES   |   |          |
| IPI00010796 | 0.9987 | 28/116 | LVESSEVAVIGFFK.D     | 3 | 2936.692 |
|             |        |        | R.LEMPDNLY[243.18]TF |   |          |
| IPI00010821 | 0.9568 | 14/ 24 | VLK.V                | 2 | 1663.292 |
|             |        |        | R.AVC[160.14]GGVLVH  |   |          |
| IPI00010858 | 0.9856 | 20/ 30 | PQWVLT.A             | 2 | 1707.592 |
|             |        |        | R.AVC[160.14]GGVLVH  |   |          |
| IPI00010858 | 0.9796 | 20/ 28 | PQWVLT.A             | 2 | 1635.692 |
|             |        |        | K.LQC[160.14]VDLHVI  |   |          |
|             |        |        | SNDVC[160.14]AQVHP   |   |          |
| IPI00010858 | 0.9999 | 39/ 76 | Q.K                  | 3 | 2334.192 |
|             |        |        | K.LQC[160.14]VDLHVI  |   |          |
|             |        |        | SNDVC[160.14]AQVHP   |   |          |
| IPI00010858 | 0.9987 | 31/ 76 | Q.K                  | 3 | 2333.792 |
|             |        |        | K.LQC[160.14]VDLHVI  |   |          |
|             |        |        | SNDVC[160.14]AQVHP   |   |          |
| IPI00010858 | 0.9993 | 34/ 76 | Q.K                  | 3 | 2332.692 |
|             |        |        | V.DLHVISNDVC[160.14  |   |          |
| IPI00010858 | 0.998  | 30/ 64 | ]AQVHPQK.V           | 3 | 1961.492 |
|             |        |        | C.VDLHVISNDVC[160.1  |   |          |
| IPI00010858 | 0.9984 | 27/ 68 | 4]AQVHPQK.V          | 3 | 2060.892 |
|             |        |        | C.VDLHVISNDVC[160.1  |   |          |
| IPI00010858 | 1      | 32/ 68 | 4]AQVHPQK.V          | 3 | 2060.292 |
|             |        |        | K.LQC[160.14]VDLHVI  |   |          |
|             |        |        | SNDVC[160.14]AQVHP   |   |          |
| IPI00010858 | 0.9977 | 38/ 76 | Q.K                  | 3 | 2332.592 |
|             |        |        | K.LQC[160.14]VDLHVI  |   |          |
|             |        |        | SNDVC[160.14]AQVHP   |   |          |
| IPI00010858 | 0.9997 | 39/ 76 | Q.K                  | 3 | 2332.192 |

|             |        |          |                                                              |   |          |
|-------------|--------|----------|--------------------------------------------------------------|---|----------|
| IPI00010858 | 0.9839 | 27/ 60   | D.LHVISNDVC[160.14]<br>AQVHPQK.V                             | 3 | 1846.292 |
| IPI00010858 | 0.9886 | 13/ 14   | V.C[160.14]AQVHPQK.<br>V                                     | 2 | 967.492  |
| IPI00010858 | 0.9859 | 31/ 68   | C.VDLHVISNDVC[160.1<br>4]AQVHPQK.V                           | 3 | 2059.892 |
| IPI00010858 | 0.9689 | 13/ 16   | K.LQC[160.14]VDLHVI.<br>S                                    | 2 | 1095.892 |
| IPI00010858 | 0.9146 | 35/ 76   | K.LQC[160.14]VDLHVI<br>SNDVC[160.14]AQVHP<br>Q.K             | 3 | 2334.292 |
| IPI00010858 | 0.9995 | 41/ 76   | K.LQC[160.14]VDLHVI<br>SNDVC[160.14]AQVHP<br>Q.K             | 3 | 2333.192 |
| IPI00010858 | 0.9995 | 36/ 76   | K.LQC[160.14]VDLHVI<br>SNDVC[160.14]AQVHP<br>Q.K             | 3 | 2333.992 |
| IPI00010858 | 0.998  | 30/ 64   | V.DLHVISNDVC[160.14<br>]AQVHPQK.V                            | 3 | 1960.192 |
| IPI00010858 | 0.9986 | 32/ 68   | C.VDLHVISNDVC[160.1<br>4]AQVHPQK.V                           | 3 | 2059.892 |
| IPI00010858 | 0.9891 | 36/ 76   | K.LQC[160.14]VDLHVI<br>SNDVC[160.14]AQVHP<br>Q.K             | 3 | 2333.892 |
| IPI00010858 | 0.9949 | 15/ 22   | R.LSEPAELTDAVK.V                                             | 2 | 1271.692 |
| IPI00010858 | 0.9997 | 19/ 22   | R.LSEPAELTDAVK.V                                             | 2 | 1272.392 |
| IPI00010858 | 0.9984 | 19/ 22   | R.LSEPAELTDAVK.V                                             | 2 | 1271.792 |
| IPI00010858 |        | 1 25/ 48 | R.PGDDSSHDLML[147.1<br>9]LLR.L                               | 3 | 1472.092 |
| IPI00010858 | 0.9941 | 14/ 16   | E.PAELTDAVK.V<br>K.VM[147.19]DLPTQEP                         | 2 | 943.292  |
| IPI00010858 | 0.9508 | 17/ 26   | ALGTT.C                                                      | 2 | 1488.892 |
| IPI00010858 | 0.9976 | 18/ 22   | R.LSEPAELTDAVK.V                                             | 2 | 1272.492 |
| IPI00010858 | 0.9998 | 18/ 22   | R.LSEPAELTDAVK.V                                             | 2 | 1272.492 |
| IPI00010858 | 0.9979 | 12/ 22   | R.LSEPAELTDAVK.V                                             | 2 | 1272.892 |
| IPI00010858 | 0.997  | 23/ 30   | K.VM[147.19]DLPTQEP<br>ALGTTTC[160.14]Y.A                    | 2 | 1812.392 |
| IPI00010858 | 0.9985 | 24/ 30   | K.VMDLPTQEPALGTTTC[<br>160.14]Y.A                            | 2 | 1796.492 |
| IPI00010858 | 0.9975 | 18/ 22   | R.LSEPAELTDAVK.V                                             | 2 | 1271.692 |
| IPI00010858 | 0.999  | 28/124   | K.VM[147.19]DLPTQEP<br>ALGTTTC[160.14]YASGW<br>GSIEPEEFLPK.K | 3 | 3541.692 |
| IPI00010858 | 0.9999 | 37/108   | K.VM[147.19]DLPTQEP<br>ALGTTTC[160.14]YASGW<br>GSIEPEEF.L    | 3 | 3103.192 |

|             |        |        |                                                                                |   |          |
|-------------|--------|--------|--------------------------------------------------------------------------------|---|----------|
| IPI00010858 | 0.9989 | 43/124 | K.VM[147.19]DLPTQEP<br>ALGTTC[160.14]YASGW<br>GSIEPEEFLTPK.K                   | 3 | 3540.992 |
| IPI00010858 | 0.9984 | 23/ 38 | K.STC[160.14]SGDSGG<br>PLVC[160.14]NGVLQGI.<br>T                               | 2 | 1980.792 |
| IPI00010896 | 0.9924 | 15/ 22 | K.GVTFNVTTVDTK.R<br>R.AVLDCG[160.14]SC[<br>160.14]C[160.14]LVC[<br>160.14]AR.Q | 2 | 1281.292 |
| IPI00011140 | 0.96   | 20/ 26 | K.GTIQVITQGTSLK.N                                                              | 2 | 1640.792 |
| IPI00011200 | 0.9936 | 16/ 24 | K.AAAVLAAESMVVTLAK<br>.V                                                       | 2 | 1345.592 |
| IPI00011571 | 0.9999 | 21/ 30 | K.AAAVLAAESMVVTLAK<br>.V                                                       | 2 | 1545.192 |
| IPI00011571 | 0.9878 | 22/ 60 | K.AAAVLAAESMVVTLAK<br>.V                                                       | 3 | 1545.592 |
| IPI00011571 | 0.9998 | 21/ 30 | K.AAAVLAAESMVVTLAK<br>.V                                                       | 2 | 1545.492 |
| IPI00011571 | 0.9834 | 37/ 60 | K.AAAVLAAESMVVTLAK<br>.V                                                       | 3 | 1546.092 |
| IPI00011571 | 0.9999 | 22/ 30 | R.YALYDATYETK.E                                                                | 2 | 1545.392 |
| IPI00012011 | 0.9965 | 15/ 20 | R.ALIGATNPADAPPGTIR<br>.G                                                      | 2 | 1337.792 |
| IPI00012315 | 1      | 22/ 32 | K.GC[160.14]SFLPDPY<br>QK.Q                                                    | 2 | 1634.592 |
| IPI00012503 | 0.9973 | 14/ 20 | K.EIC[160.14]ALVGFC[<br>160.14]DEVK.E                                          | 2 | 1311.192 |
| IPI00012503 | 0.9988 | 19/ 24 | K.SDVYC[160.14]EVC[1<br>60.14]EFLVK.E                                          | 2 | 1539.892 |
| IPI00012503 | 0.9987 | 17/ 24 | K.SDVYC[160.14]EVC[1<br>60.14]EFLVK.E                                          | 2 | 1647.992 |
| IPI00012503 | 0.9982 | 22/ 48 | K.EIC[160.14]ALVGFC[<br>160.14]DEVK.E                                          | 3 | 1649.692 |
| IPI00012503 | 0.9963 | 15/ 24 | K.EIC[160.14]ALVGFC[<br>160.14]DEVK.E                                          | 2 | 1540.892 |
| IPI00012503 | 1      | 21/ 24 | K.SDVYC[160.14]EVC[1<br>60.14]EFLVK.E                                          | 2 | 1541.692 |
| IPI00012503 | 0.994  | 20/ 24 | K.SDVYC[160.14]EVC[1<br>60.14]EFLVK.E                                          | 2 | 1647.792 |
| IPI00012503 | 0.9958 | 17/ 24 | Q.PNLDTTC[160.14]AFH<br>EQPELQKK.Q                                             | 2 | 1647.192 |
| IPI00013382 | 0.9944 | 24/ 64 | R.IGAEVYHNLK.N                                                                 | 3 | 2054.792 |
| IPI00013769 | 0.9998 | 21/ 36 | R.SAYQEAM[147.19]DI<br>SK.K                                                    | 3 | 1144.092 |
| IPI00013890 | 0.9987 | 15/ 20 | R.LPLQDVYK.I                                                                   | 2 | 1259.392 |
| IPI00014424 | 0.9862 | 13/ 14 | K.EPVVYPWM[147.19]R<br>K.V                                                     | 2 | 974.892  |
| IPI00014540 | 0.9319 | 11/ 18 |                                                                                | 2 | 1320.492 |

|             |        |        |                                                              |   |          |
|-------------|--------|--------|--------------------------------------------------------------|---|----------|
| IPI00016150 | 0.9991 | 20/ 24 | R.QEVPLATLEPLVK.A                                            | 2 | 1437.792 |
| IPI00016339 | 0.977  | 16/ 20 | K.LVLLGESAVGK.S                                              | 2 | 1085.392 |
| IPI00016381 | 0.998  | 18/ 20 | K.FLALGDSGVGK.T                                              | 2 | 1064.592 |
| IPI00016381 | 0.9972 | 16/ 20 | K.FLALGDSGVGK.T                                              | 2 | 1062.992 |
| IPI00016862 | 0.9985 | 18/ 24 | K.LGGTC[160.14]VNVG<br>C[160.14]VPK.K<br>R.KLETKGYGQGPGK.LK. | 2 | 1360.092 |
| IPI00017163 | 0.9819 | 24/ 56 | L                                                            | 3 | 1605.392 |
| IPI00017367 | 0.9993 | 16/ 18 | K.APDFV FYAPR.L                                              | 2 | 1183.892 |
| IPI00017601 | 0.9944 | 15/ 18 | R.EYTDASFTNR.K                                               | 2 | 1203.292 |
| IPI00017601 | 0.9953 | 19/ 24 | K.GAYPLSIEPIGVR.F                                            | 2 | 1371.792 |
| IPI00017601 | 0.9996 | 22/ 26 | K.DIASGLIGPLIIC[160.<br>14]K.K                               | 2 | 1469.792 |
| IPI00017601 | 0.9982 | 28/ 88 | R.SVPPSASHVAPTETFTY<br>EWTVPK.E                              | 3 | 2531.992 |
| IPI00017601 | 0.9999 | 37/ 80 | K.M[147.19]YYSAVDPT<br>KDIFTGLIGPM[147.19]                   | 3 | 2382.192 |
| IPI00017601 | 0.999  | 20/ 26 | K.I<br>K.DIASGLIGPLIIC[160.<br>14]K.K                        | 2 | 1469.792 |
| IPI00017601 | 0.9921 | 16/ 26 | K.EVGPTNADPVC[160.1<br>4]LAK.M                               | 2 | 1470.392 |
| IPI00017601 | 0.9975 | 27/ 88 | R.SVPPSASHVAPTETFTY<br>EWTVPK.E                              | 3 | 2532.192 |
| IPI00017601 | 0.9997 | 20/ 24 | K.GAYPLSIEPIGVR.F                                            | 2 | 1371.992 |
| IPI00017601 | 0.9531 | 27/ 80 | K.M[147.19]YYSAVDPT<br>KDIFTGLIGPM[147.19]                   | 3 | 2379.592 |
| IPI00017601 | 0.9828 | 22/ 26 | K.I<br>K.DIASGLIGPLIIC[160.<br>14]K.K                        | 2 | 1470.292 |
| IPI00017601 | 0.9427 | 19/ 24 | K.DLYSGLIGPLIVC[160.<br>14].R                                | 2 | 1419.692 |
| IPI00017601 | 0.9496 | 19/ 24 | K.DLYSGLIGPLIVC[160.<br>14].R                                | 2 | 1419.392 |
| IPI00018278 | 0.9827 | 12/ 12 | R.HLQLAIR.G                                                  | 2 | 849.792  |
| IPI00018314 | 0.9937 | 24/ 40 | R.FDNTYSFIHAK.K                                              | 3 | 1343.892 |
| IPI00018901 | 0.9946 | 17/ 24 | R.NIDQAVTAALETR.H                                            | 2 | 1401.392 |
| IPI00018901 | 0.9897 | 15/ 16 | K.FVDVTEVVR.N                                                | 2 | 1063.692 |
| IPI00018953 | 0.9997 | 18/ 22 | K.VTC[160.14]LSC[160<br>.14]ELNPER.C                         | 2 | 1477.692 |
| IPI00018953 | 0.9999 | 16/ 18 | R.C[160.14]QYYSVSFS<br>K.E                                   | 2 | 1268.592 |
| IPI00018953 | 0.9392 | 13/ 18 | R.C[160.14]QYYSVSFS<br>K.E                                   | 2 | 1269.492 |
| IPI00018953 | 0.9961 | 18/ 22 | K.VTC[160.14]LSC[160<br>.14]ELNPER.C                         | 2 | 1477.092 |
| IPI00018953 | 0.9997 | 15/ 18 | R.C[160.14]QYYSVSFS<br>K.E                                   | 2 | 1268.692 |
| IPI00018953 | 0.9924 | 13/ 16 | K.TYTLTDY.LK.N                                               | 2 | 1117.692 |

|             |        |        |                                      |   |          |
|-------------|--------|--------|--------------------------------------|---|----------|
| IPI00019275 | 0.9964 | 16/ 26 | R.VVLGANGTYSC[160.14]LVR.N           | 2 | 1509.492 |
| IPI00019359 | 0.9775 | 32/156 | R.GGSGGSHGGGSGFG<br>GESGGSYGGGEEASGS | 3 | 3223.092 |
| IPI00019359 | 1      | 51/156 | GGGYGGGSGK.S                         | 3 | 3224.392 |
| IPI00019359 | 0.9967 | 15/ 16 | K.TLLDIDNTR.M                        | 2 | 1060.592 |
| IPI00019359 | 1      | 53/156 | R.GGSGGSHGGGSGFG<br>GESGGSYGGGEEASGS | 3 | 3224.792 |
| IPI00019359 | 0.9987 | 21/ 26 | GGGYGGGSGK.S                         | 2 | 1587.492 |
| IPI00019359 | 0.9268 | 12/ 18 | K.VQALEEANNDLENK.I                   | 2 | 1206.392 |
| IPI00019359 | 1      | 23/ 26 | R.QVLDNLTM[147.19]E                  | 2 | 1587.392 |
| IPI00019359 | 0.9963 | 15/ 16 | K.S                                  | 2 | 1060.392 |
| IPI00019359 | 0.9961 | 32/ 72 | K.VQALEEANNDLENK.I                   | 2 | 1588.592 |
| IPI00019359 | 0.9991 | 24/ 56 | K.TLLDIDNTR.M                        | 3 | 1350.592 |
| IPI00019359 | 0.9889 | 27/ 80 | Y.LSRSGGGGGGLGSG<br>GSIR.S           | 3 | 1813.392 |
| IPI00019359 | 0.9998 | 53/156 | K.IGLGRRGGSGGSYGR.<br>G              | 3 | 3223.292 |
| IPI00019359 | 0.978  | 22/ 56 | R.SGGGGGGGLGSGGSI<br>RSSYSR.F        | 3 | 1350.892 |
| IPI00019359 | 0.9999 | 57/156 | R.GGSGGSHGGGSGFG<br>GESGGSYGGGEEASGS | 3 | 3223.392 |
| IPI00019359 | 0.9985 | 45/112 | GGGYGGGSGK.S                         | 3 | 3265.092 |
| IPI00019591 | 0.9907 | 27/ 88 | K.IGLGRRGGSGGSYGR.<br>G              | 3 | 2660.292 |
| IPI00019591 | 0.9983 | 22/ 44 | R.GGSGGSHGGGSGFG<br>GESGGSYGGGEEASGS | 2 | 2660.692 |
| IPI00019872 | 0.9069 | 12/ 18 | GGGYGGGSGK.S                         | 2 | 1290.492 |
| IPI00020091 | 0.9982 | 13/ 14 | K.DIENQYETQITQIEHEV                  | 2 | 994.292  |
| IPI00020091 | 0.9954 | 21/ 24 | SSSGQEVQSSAK.E                       | 2 | 1587.892 |
| IPI00020091 | 0.9737 | 20/ 24 | R.LLQEGQALEYVC[160.14]PSGFYPYPVQT.R  | 2 | 1587.992 |
| IPI00020982 | 0.9867 | 17/ 22 | R.LLQEGQALEYVC[160.14]PSGFYPYPVQT.R  | 2 | 1434.892 |
|             |        |        | K.SPFAYY[243.18]T[181.11]PGK.G       |   |          |
|             |        |        | K.TEDTIFLR.E                         |   |          |
|             |        |        | K.EQLGEFYEALDC[160.14]L.C            |   |          |
|             |        |        | K.EQLGEFYEALDC[160.14]L.C            |   |          |
|             |        |        | K.NTVFLIEM[147.19]LLPK.K             |   |          |



|             |        |        |                          |   |          |
|-------------|--------|--------|--------------------------|---|----------|
| IPI00021263 | 0.9809 | 21/ 26 | K.SVTEQGAELSNEER.N       | 2 | 1548.492 |
| IPI00021304 | 0.994  | 24/ 26 | R.GFSSGSAVVSGGSR.R       | 2 | 1253.492 |
| IPI00021304 | 0.9996 | 30/ 60 | R.HGGGGGGFGGGGFG<br>SR.S | 3 | 1320.892 |
| IPI00021304 | 1      | 22/ 26 | R.GFSSGSAVVSGGSR.R       | 2 | 1256.892 |
| IPI00021304 | 0.9901 | 26/ 72 | R.TSQNSELNNM[147.1       | 3 | 2271.492 |
| IPI00021304 | 0.9984 | 16/ 16 | 9]QDLVEDYKK.K            | 2 | 1037.292 |
| IPI00021304 | 0.9998 | 19/ 22 | R.YLDGLTAER.T            | 2 | 1329.292 |
| IPI00021304 | 1      | 17/ 18 | K.NVQDAIADAEQR.G         | 2 | 1194.692 |
| IPI00021304 | 0.9997 | 21/ 26 | K.YEELQVTVGR.H           | 2 | 1254.292 |
| IPI00021304 | 0.9568 | 13/ 16 | R.GFSSGSAVVSGGSR.R       | 2 | 1085.292 |
| IPI00021304 | 0.9999 | 18/ 22 | K.DVDNAYM[147.19]IK.     | 2 | 1329.192 |
| IPI00021304 | 0.9995 | 17/ 18 | V                        | 2 | 1193.392 |
| IPI00021304 | 0.9987 | 22/ 26 | K.NVQDAIADAEQR.G         | 2 | 1253.692 |
| IPI00021304 | 0.9917 | 13/ 14 | K.YEELQVTVGR.H           | 2 | 973.192  |
| IPI00021304 | 0.9962 | 13/ 14 | R.GFSSGSAVVSGGSR.R       | 2 | 974.492  |
| IPI00021304 | 0.9721 | 13/ 14 | K.IEISELNR.V             | 2 | 973.192  |
| IPI00021304 | 0.9965 | 20/ 22 | K.IEISELNR.V             | 2 | 1475.492 |
| IPI00021304 | 0.997  | 20/ 22 | R.FLEQQNQVLQTK.W         | 2 | 1475.892 |
| IPI00021304 | 0.9982 | 20/ 22 | R.FLEQQNQVLQTK.W         | 2 | 1475.992 |
| IPI00021304 | 0.9958 | 20/ 22 | R.FLEQQNQVLQTK.W         | 2 | 1476.292 |
| IPI00021304 | 0.9966 | 20/ 22 | R.FLEQQNQVLQTK.W         | 2 | 1475.492 |
| IPI00021304 | 0.9915 | 20/ 22 | R.FLEQQNQVLQTK.W         | 2 | 1477.092 |
| IPI00021304 | 0.9939 | 20/ 22 | R.FLEQQNQVLQTK.W         | 2 | 1475.492 |
| IPI00021304 | 0.9962 | 14/ 16 | K.AQYEEIAQR.S            | 2 | 1107.492 |
| IPI00021304 | 0.9923 | 13/ 16 | K.AQYEEIAQR.S            | 2 | 1107.192 |
| IPI00021304 | 0.9922 | 14/ 16 | K.AQYEEIAQR.S            | 2 | 1106.892 |
| IPI00021304 | 0.9899 | 14/ 16 | K.AQYEEIAQR.S            | 2 | 1106.892 |
| IPI00021439 | 0.9995 | 25/ 80 | K.DLYANTVLSGGTTM[1       | 3 | 2231.592 |
| IPI00021439 | 0.9999 | 44/100 | 47.19]YPGIADR.M          | 3 | 2747.292 |
| IPI00021439 | 0.9999 | 41/104 | R.TTGIVM[147.19]DSG      | 3 | 2817.992 |
| IPI00021439 | 0.9926 | 40/108 | DGVTHTVPIYEGYALPH.       | 3 | 2931.592 |
| IPI00021727 | 0.9122 | 14/ 22 | A                        | 2 | 1459.192 |
| IPI00021828 | 0.9927 | 19/ 22 | R.TTGIVM[147.19]DSG      | 2 | 1326.192 |
|             |        |        | DGVTHTVPIYEGYALPHA       |   |          |
|             |        |        | .I                       |   |          |
|             |        |        | R.TTGIVM[147.19]DSG      |   |          |
|             |        |        | DGVTHTVPIYEGYALPHA       |   |          |
|             |        |        | I.L                      |   |          |
|             |        |        | R.LM[147.19]QC[160.1     |   |          |
|             |        |        | 4]LPNPEDVK.M             |   |          |
|             |        |        | K.SQVVAGTNYFIK.V         |   |          |

|             |        |        |                                                   |   |          |
|-------------|--------|--------|---------------------------------------------------|---|----------|
| IPI00021828 | 0.9995 | 19/ 22 | K.SQVVAGTNYFIK.V                                  | 2 | 1325.992 |
| IPI00021833 | 0.9975 | 13/ 14 | R.TVIYEIPR.S                                      | 2 | 990.092  |
| IPI00021841 | 0.9989 | 20/ 24 | R.DYVSQFEGSALGK.Q                                 | 2 | 1400.192 |
| IPI00021841 | 0.9441 | 18/ 22 | R.VKDLATVYVDVL.K                                  | 2 | 1334.992 |
| IPI00021841 | 0.9989 | 18/ 20 | K.DLATVYVDVLK.D                                   | 2 | 1236.092 |
| IPI00021841 | 0.9959 | 15/ 18 | K.VSFLSALEEY.T                                    | 2 | 1157.392 |
| IPI00021841 | 0.9934 | 13/ 18 | R.QGLLPVLESF.K                                    | 2 | 1101.992 |
| IPI00021841 | 0.9995 | 17/ 20 | K.VSFLSALEEY.T.K                                  | 2 | 1258.692 |
| IPI00021854 | 0.9898 | 25/ 36 | K.EPC[160.14]VESLVS<br>QYFQTVTDYG.K               | 2 | 2221.792 |
| IPI00021854 | 0.976  | 34/ 84 | K.AGTELVNFLSYFVELGT<br>QPATQ.-                    | 3 | 2385.892 |
| IPI00021854 | 0.9852 | 19/ 28 | K.EPC[160.14]VESLVS<br>QYFQTV.T                   | 2 | 1786.292 |
| IPI00021854 | 0.9997 | 26/ 38 | K.EPC[160.14]VESLVS<br>QYFQTVTDYGK.D              | 2 | 2350.092 |
| IPI00021854 | 0.9475 | 29/ 76 | K.EPC[160.14]VESLVS<br>QYFQTVTDYGK.D              | 3 | 2350.792 |
| IPI00021854 | 0.9914 | 24/ 36 | K.EPC[160.14]VESLVS<br>QYFQTVTDYG.K               | 2 | 2221.692 |
| IPI00021891 | 0.9593 | 24/ 38 | R.FGSYC[160.14]PTTC[<br>160.14]GIADFLSTYQT.K      | 2 | 2288.892 |
| IPI00021891 | 0.9996 | 30/ 80 | R.FGSYC[160.14]PTTC[<br>160.14]GIADFLSTYQTK<br>.V | 3 | 2418.692 |
| IPI00021891 | 1      | 25/ 40 | R.FGSYC[160.14]PTTC[<br>160.14]GIADFLSTYQTK<br>.V | 2 | 2418.792 |
| IPI00021891 | 0.9998 | 24/ 40 | R.FGSYC[160.14]PTTC[<br>160.14]GIADFLSTYQTK<br>.V | 2 | 2416.992 |
| IPI00021891 | 0.9164 | 23/ 38 | R.FGSYC[160.14]PTTC[<br>160.14]GIADFLSTYQT.K      | 2 | 2288.892 |
| IPI00021891 | 0.9959 | 26/ 76 | R.FGSYC[160.14]PTTC[<br>160.14]GIADFLSTYQT.K      | 3 | 2290.592 |
| IPI00021891 | 0.975  | 11/ 18 | R.TSTADYAM[147.19]F<br>K.V                        | 2 | 1151.592 |
| IPI00021891 | 0.9646 | 23/ 48 | K.YEASILTHDSSIR.Y<br>K.C[160.14]HAGHLNGV          | 3 | 1492.992 |
| IPI00021891 | 0.9811 | 19/ 32 | YYQGGTYS.K                                        | 2 | 1884.592 |
| IPI00021891 | 0.9982 | 19/ 22 | K.YEASILTHDSSI.R                                  | 2 | 1336.392 |
| IPI00021891 | 0.9149 | 21/ 26 | K.IHLISTQSAIPYAL.R                                | 2 | 1527.492 |
| IPI00022204 | 0.9997 | 15/ 18 | R.GLVLSGVLHK.A                                    | 2 | 1022.192 |
| IPI00022204 | 0.9864 | 16/ 18 | R.GLVLSGVLHK.A                                    | 2 | 1022.792 |
| IPI00022204 | 0.9982 | 15/ 18 | R.GLVLSGVLHK.A                                    | 2 | 1022.192 |

|             |        |        |                                                                                           |   |          |
|-------------|--------|--------|-------------------------------------------------------------------------------------------|---|----------|
| IPI00022227 | 0.9997 | 20/ 28 | K.VTEFM[147.19]LC[16<br>0.14]AGLWTGGK.D                                                   | 2 | 1685.692 |
| IPI00022227 | 0.9985 | 18/ 28 | K.VTEFM[147.19]LC[16<br>0.14]AGLWTGGK.D                                                   | 2 | 1685.792 |
| IPI00022227 | 0.9993 | 19/ 28 | K.VTEFM[147.19]LC[16<br>0.14]AGLWTGGK.D                                                   | 2 | 1685.792 |
| IPI00022229 | 0.9983 | 38/ 76 | R.VPSYTLILPSLELPVLH<br>VPR.N                                                              | 3 | 2245.192 |
| IPI00022229 | 0.9989 | 21/ 28 | K.VSALLTPAEQTGTWK.L                                                                       | 2 | 1600.992 |
| IPI00022229 | 0.9993 | 19/ 28 | K.IEGNLIFDPNNYLPK.E<br>R.HFNPVC[160.14]GSD<br>M[147.19]STYANEC[16<br>0.14]TLC[160.14]M[14 | 2 | 1747.492 |
| IPI00022231 | 0.9993 | 38/ 84 | 7.19]K.I                                                                                  | 3 | 2655.892 |
| IPI00022255 | 0.9994 | 17/ 20 | R.EYVQLISVYEK.K                                                                           | 2 | 1370.392 |
| IPI00022255 | 0.9988 | 19/ 22 | K.VQSINYNPFDQK.L<br>K.LYVYNDGYLLNYDLSV                                                    | 2 | 1452.292 |
| IPI00022255 | 0.9485 | 26/ 80 | LQKPQ.-                                                                                   | 3 | 2518.592 |
| IPI00022255 | 0.9987 | 18/ 22 | K.VQSINYNPFDQK.L                                                                          | 2 | 1452.692 |
| IPI00022418 | 0.992  | 20/ 28 | R.TYLGNALVC[160.14]T<br>C[160.14]YGG.S.R                                                  | 2 | 1635.492 |
| IPI00022418 | 0.9842 | 17/ 26 | K.EATIPGHLNSYTIK.G<br>R.WKEATIPGHLNSYTIK.                                                 | 2 | 1543.192 |
| IPI00022418 | 0.9365 | 23/ 60 | G                                                                                         | 3 | 1859.392 |
| IPI00022418 | 0.9906 | 14/ 16 | K.YEVSUYALK.D                                                                             | 2 | 1072.792 |
| IPI00022418 | 0.9978 | 17/ 26 | V.DVIPVNLPGHEGQR.L                                                                        | 2 | 1530.892 |
| IPI00022418 | 0.9619 | 17/ 20 | I.PVNLPGEHGQR.L<br>R.VDVIPVNLPGHEGQR.                                                     | 2 | 1203.492 |
| IPI00022418 | 0.9992 | 19/ 28 | L<br>S.SPVVIDASTAIDAPSNL                                                                  | 2 | 1629.592 |
| IPI00022418 | 0.9998 | 29/ 34 | R.F                                                                                       | 2 | 1826.692 |
| IPI00022418 | 0.9996 | 17/ 20 | R.DLQFVEVTDVK.V<br>R.SSPVVIDASTAIDAPS                                                     | 2 | 1293.592 |
| IPI00022418 | 0.9999 | 25/ 36 | NLR.F                                                                                     | 2 | 1914.692 |
| IPI00022418 | 0.9942 | 22/ 28 | V.TIM[147.19]WTPPESA<br>VTGYR.V                                                           | 2 | 1725.892 |
| IPI00022418 | 0.9909 | 19/ 26 | A.EVTGLSPGVTTYFK.V<br>R.NLQPASEYTVSLVAIK.                                                 | 2 | 1560.992 |
| IPI00022418 | 0.9213 | 25/ 60 | G                                                                                         | 3 | 1733.992 |
| IPI00022418 | 0.9998 | 21/ 30 | K.VTIM[147.19]WTPPE<br>SAVTGYR.V                                                          | 2 | 1823.592 |

|             |        |        |                                            |   |          |
|-------------|--------|--------|--------------------------------------------|---|----------|
| IPI00022418 | 0.9984 | 20/ 28 | F.AEVTGLSPGVTTYFK.V<br>R.NLQPASEYTVSLVAIK. | 2 | 1631.492 |
| IPI00022418 | 0.9997 | 25/ 30 | G<br>K.VTIM[147.19]WTPPE                   | 2 | 1732.692 |
| IPI00022418 | 0.9958 | 23/ 30 | SAVTGYR.V<br>K.EINLAPDSSSVVVSGL            | 2 | 1826.692 |
| IPI00022418 | 0.9989 | 27/ 40 | M[147.19]VATK.Y<br>K.STATISGLKPGVDYTIT     | 2 | 2136.192 |
| IPI00022418 | 0.9879 | 18/ 38 | VYA.V<br>T.FAEVTGLSPGVTTYFK.               | 2 | 2057.892 |
| IPI00022418 | 0.9998 | 24/ 30 | V<br>K.EINLAPDSSSVVVSGL                    | 2 | 1779.992 |
| IPI00022418 | 0.9944 | 30/ 40 | M[147.19]VATK.Y<br>K.STATISGLKPGVDYTIT     | 2 | 2132.992 |
| IPI00022418 | 0.9999 | 32/ 92 | VYAVTGR.G<br>R.NTFAEVTGLSPGVTTY.           | 3 | 2471.392 |
| IPI00022418 | 1      | 23/ 30 | F<br>N.TFAEVTGLSPGVTTYFK                   | 2 | 1719.792 |
| IPI00022418 | 0.9995 | 24/ 32 | .V<br>R.NTFAEVTGLSPGVTTYF                  | 2 | 1879.392 |
| IPI00022418 | 0.9998 | 26/ 34 | K.V<br>K.EINLAPDSSSVVVSGL                  | 2 | 1995.292 |
| IPI00022418 | 0.9471 | 29/ 40 | MVATK.Y<br>R.FLATTPNSLLVSWQPP              | 2 | 2117.892 |
| IPI00022418 | 0.9944 | 18/ 32 | R.A<br>K.EINLAPDSSSVVVSGL                  | 2 | 1927.792 |
| IPI00022418 | 0.9995 | 35/ 80 | MVATK.Y<br>R.FLATTPNSLLVSWQPP              | 3 | 2118.192 |
| IPI00022418 | 0.9987 | 33/ 64 | R.A<br>K.FTQVTPTSLSAQWTPP                  | 3 | 1928.592 |
| IPI00022418 | 0.9978 | 23/ 44 | NVQLTGY.R<br>R.FDFTTTSTSTPVTSTNTV          | 2 | 2537.492 |
| IPI00022418 | 0.9918 | 34/104 | TGETTPFSPL.V<br>R.NTFAEVTGLSPGVTTYF        | 3 | 2836.692 |
| IPI00022418 | 0.9932 | 21/ 32 | .K                                         | 2 | 1867.092 |
| IPI00022418 | 0.9336 | 17/ 26 | K.EATIPGHLNSYTIK.G<br>R.NLQPASEYTVSLVAIK.  | 2 | 1543.492 |
| IPI00022418 | 0.9972 | 24/ 30 | G<br>R.NLQPASEYTVSLVAIK.                   | 2 | 1733.692 |
| IPI00022418 | 1      | 27/ 60 | G<br>K.STATISGLKPGVDYTIT                   | 3 | 1734.392 |
| IPI00022418 | 0.9843 | 17/ 36 | VY.A<br>R.NTFAEVTGLSPGVTTYF                | 2 | 1985.792 |
| IPI00022418 | 1      | 25/ 34 | K.V<br>K.VTIM[147.19]WTPPE                 | 2 | 1995.892 |
| IPI00022418 | 0.997  | 16/ 28 | SAVTGYR<br>K.FTQVTPTSLSAQWTPP              | 2 | 1667.992 |
| IPI00022418 | 0.9999 | 25/ 44 | NVQLTGY.R                                  | 2 | 2536.392 |

|             |        |        |                                                   |   |          |
|-------------|--------|--------|---------------------------------------------------|---|----------|
| IPI00022418 | 0.9886 | 16/ 32 | R.NTFAEVTGLSPGVTTYF<br>.K                         | 2 | 1865.892 |
| IPI00022418 | 0.9673 | 24/ 40 | R.ITYGETGGNSPVQEFT<br>VPGSK.S                     | 2 | 2167.792 |
| IPI00022418 | 0.9737 | 23/ 34 | R.EESPLLIGQQSTVSDV<br>PR.D                        | 2 | 1954.892 |
| IPI00022418 | 0.9977 | 26/ 44 | R.DLEVVAATPTSLLISW<br>DAPAVTV.R                   | 2 | 2369.192 |
| IPI00022418 | 0.9906 | 19/ 44 | R.NSITLTNLTPGTEYVVS<br>IVALNG.R                   | 2 | 2375.892 |
| IPI00022418 | 0.9972 | 26/ 52 | W.APPPSIDLTNFLVR.Y<br>K.TGLDSPTGIDFSDITAN         | 3 | 1540.792 |
| IPI00022418 | 0.9592 | 27/ 42 | SFTVH.W<br>K.TGLDSPTGIDFSDITAN                    | 2 | 2296.092 |
| IPI00022418 | 0.9969 | 25/ 36 | SF.T<br>R.VTWAPPPSIDLTNFLVR                       | 2 | 1958.992 |
| IPI00022418 | 0.9976 | 32/ 64 | .Y<br>R.VTWAPPPSIDLTNFLVR                         | 3 | 1925.292 |
| IPI00022418 | 0.9926 | 26/ 32 | .Y<br>R.VTWAPPPSIDLTNFLVR                         | 2 | 1925.492 |
| IPI00022418 | 0.9965 | 26/ 32 | .Y<br>R.VTWAPPPSIDLTNFLVR                         | 2 | 1928.792 |
| IPI00022418 | 0.9996 | 26/ 32 | .Y<br>R.VTWAPPPSIDLTNFLV.                         | 2 | 1925.892 |
| IPI00022418 | 0.9954 | 22/ 30 | R<br>K.EYLGAIC[160.14]SC[<br>160.14]TC[160.14]FGG | 2 | 1771.192 |
| IPI00022418 | 0.9984 | 23/ 28 | Q.R<br>K.LLC[160.14]QC[160.                       | 2 | 1722.292 |
| IPI00022418 | 0.9991 | 19/ 24 | 14]LGFGSGHF.R<br>K.LLC[160.14]QC[160.             | 2 | 1495.592 |
| IPI00022418 | 0.9963 | 20/ 24 | 14]LGFGSGHF.R<br>K.LLC[160.14]QC[160.             | 2 | 1495.492 |
| IPI00022418 | 0.9251 | 15/ 22 | 14]LGFGSGH.F<br>K.LLC[160.14]QC[160.              | 2 | 1348.592 |
| IPI00022418 | 0.9999 | 20/ 24 | 14]LGFGSGHF.R<br>P.YPPNVGEEIQIGHIPR.E             | 2 | 1496.792 |
| IPI00022418 | 0.9985 | 27/ 60 |                                                   | 3 | 1820.792 |
| IPI00022429 | 1      | 27/ 56 | R.YVGGQEHFAHLLILR.D<br>R.QDQC[160.14]IYNTT        | 3 | 1753.792 |
| IPI00022429 | 1      | 20/ 28 | YLVNQR.E<br>R.QDQC[160.14]IYNTT                   | 2 | 1917.092 |
| IPI00022429 | 1      | 21/ 28 | YLVNQR.E<br>R.AQLVPLPPSTYVEFTVS                   | 2 | 1916.692 |
| IPI00022431 | 0.9968 | 26/ 42 | GTDC[160.14]V.A                                   | 2 | 2381.092 |

|             |        |        |                                         |   |          |
|-------------|--------|--------|-----------------------------------------|---|----------|
| IPI00022431 | 0.9964 | 25/ 44 | R.AQLVPLPPSTYVEFTVS<br>GTDC[160.14]VA.K | 2 | 2452.192 |
| IPI00022431 | 0.9916 | 27/ 42 | R.AQLVPLPPSTYVEFTVS<br>GTDC[160.14]V.A  | 2 | 2381.992 |
| IPI00022432 | 0.9792 | 20/ 24 | Y.SYSTTAVVTNPK.E-                       | 2 | 1396.392 |
| IPI00022432 | 0.9997 | 30/ 84 | R.YTIAALLSPYSYSTTAV<br>VTNPK.E          | 3 | 2360.092 |
| IPI00022432 | 1      | 28/ 42 | R.YTIAALLSPYSYSTTAV<br>VTNPK.E          | 2 | 2360.092 |
| IPI00022432 | 1      | 25/ 42 | R.YTIAALLSPYSYSTTAV<br>VTNPK.E          | 2 | 2360.592 |
| IPI00022432 | 0.9968 | 27/ 44 | R.YTIAALLSPYSYSTTAV<br>VTNPK.E-         | 2 | 2488.792 |
| IPI00022432 | 0.9993 | 24/ 32 | A.LLSPYSYSTTAVVTNPK<br>.E               | 2 | 1840.692 |
| IPI00022432 | 0.9997 | 28/ 42 | R.YTIAALLSPYSYSTTAV<br>VTNPK.E          | 2 | 2360.892 |
| IPI00022432 | 0.9981 | 28/ 44 | R.YTIAALLSPYSYSTTAV<br>VTNPK.E-         | 2 | 2488.992 |
| IPI00022432 | 0.9387 | 24/ 38 | R.YTIAALLSPYSYSTTAV<br>VTN.P            | 2 | 2135.192 |
| IPI00022432 | 0.9994 | 19/ 24 | K.AADDTWEPFASGK.T                       | 2 | 1394.292 |
| IPI00022432 | 0.9877 | 15/ 24 | R.GSPAINVAVHVFR.K                       | 2 | 1365.992 |
| IPI00022432 | 0.998  | 18/ 24 | K.AADDTWEPFASGK.T                       | 2 | 1394.592 |
| IPI00022432 | 0.9986 | 15/ 20 | R.GSPAINVAVHV.F                         | 2 | 1063.492 |
| IPI00022432 | 0.9992 | 18/ 24 | K.AADDTWEPFASGK.T                       | 2 | 1397.092 |
| IPI00022434 | 0.9915 | 9/ 10  | K.SEVAHR.F                              | 2 | 698.192  |
| IPI00022434 | 0.971  | 14/ 16 | K.KVPQVSTPT.L                           | 2 | 956.392  |
| IPI00022434 | 0.9255 | 12/ 14 | K.DLGEENFK.A                            | 2 | 951.192  |
| IPI00022434 | 0.9845 | 10/ 14 | K.DLGEENFK.A                            | 1 | 950.492  |
| IPI00022434 | 0.9309 | 14/ 16 | S.TPTLVEVSR.N                           | 2 | 1001.292 |
| IPI00022434 | 1      | 13/ 18 | R.FKDLGEENFK.A                          | 1 | 1225.492 |
| IPI00022434 | 0.9937 | 16/ 18 | R.FKDLGEENFK.A                          | 2 | 1226.192 |
| IPI00022434 | 0.9991 | 23/ 36 | K.KQTALVELVK.H                          | 3 | 1128.392 |
| IPI00022434 | 0.9988 | 16/ 18 | K.KQTALVELVK.H                          | 2 | 1128.092 |
| IPI00022434 | 0.9935 | 13/ 18 | K.KQTALVELVK.H                          | 1 | 1127.692 |
| IPI00022434 | 0.9911 | 25/ 56 | K.KVPQVSTPTLVEVSR.N                     | 3 | 1639.592 |
| IPI00022434 | 0.9967 | 21/ 28 | K.KVPQVSTPTLVEVSR.N                     | 2 | 1639.692 |
| IPI00022434 | 0.9803 | 18/ 22 | F.KPLVEEPQNLIK.Q                        | 2 | 1407.792 |
| IPI00022434 | 0.9927 | 13/ 14 | T.PTLVEVSR.N                            | 2 | 900.292  |
| IPI00022434 | 0.9842 | 13/ 14 | K.FQNALLVR.Y                            | 2 | 960.192  |
| IPI00022434 | 0.9999 | 20/ 26 | K.VPQVSTPTLVEVSR.N                      | 2 | 1511.192 |

|             |        |        |                              |   |          |
|-------------|--------|--------|------------------------------|---|----------|
| IPI00022434 | 0.9882 | 13/ 14 | K.FQNALLVR.Y                 | 2 | 959.892  |
| IPI00022434 | 0.9985 | 18/ 22 | F.SALEVDETYVPK.E             | 2 | 1350.392 |
| IPI00022434 | 0.9626 | 33/ 56 | K.KVPQVSTPTLVEVSR.N          | 3 | 1640.292 |
| IPI00022434 | 0.9641 | 21/ 52 | K.VPQVSTPTLVEVSR.N           | 3 | 1511.192 |
| IPI00022434 | 0.9922 | 14/ 16 | K.QTALVELVK.H                | 2 | 1000.092 |
| IPI00022434 | 0.9947 | 21/ 28 | K.KVPQVSTPTLVEVSR.N          | 2 | 1638.792 |
| IPI00022434 | 0.9998 | 19/ 26 | K.VPQVSTPTLVEVSR.N           | 2 | 1511.392 |
| IPI00022434 | 0.9998 | 21/ 26 | K.VPQVSTPTLVEVSR.N           | 2 | 1511.892 |
| IPI00022434 | 0.9694 | 12/ 26 | K.VPQVSTPTLVEVSR.N           | 1 | 1510.692 |
| IPI00022434 | 0.9488 | 18/ 24 | V.PQVSTPTLVEVSR.N            | 2 | 1412.092 |
| IPI00022434 | 0.9553 | 17/ 20 | K.PLVEEPQNLIK.Q              | 2 | 1278.992 |
| IPI00022434 | 0.9944 | 14/ 18 | K.KQTALVELVK.H               | 2 | 1128.592 |
| IPI00022434 | 0.9989 | 20/ 28 | K.KVPQVSTPTLVEVSR.N          | 2 | 1638.992 |
| IPI00022434 | 0.9979 | 19/ 26 | K.VPQVSTPTLVEVSR.N           | 2 | 1514.192 |
| IPI00022434 | 0.9977 | 14/ 28 | K.KVPQVSTPTLVEVSR.N          | 2 | 1639.392 |
| IPI00022434 | 0.9868 | 21/ 24 | C.FSALEVDETYVPK.E            | 2 | 1497.392 |
| IPI00022434 | 0.9999 | 19/ 22 | K.AVM[147.19]DDFAAF<br>VEK.C | 2 | 1358.792 |
| IPI00022434 | 0.959  | 14/ 18 | V.M[147.19]DDFAAFVE<br>K.C   | 2 | 1187.992 |
| IPI00022434 | 0.999  | 18/ 22 | K.AVM[147.19]DDFAAF<br>VEK.C | 2 | 1360.992 |
| IPI00022434 | 1      | 12/ 22 | K.AVM[147.19]DDFAAF<br>VEK.C | 1 | 1359.592 |
| IPI00022434 | 0.9886 | 17/ 22 | K.AVM[147.19]DDFAAF<br>VEK.C | 2 | 1357.492 |
| IPI00022434 | 0.9671 | 21/ 26 | K.VFDEFKPLVEEPQN.L           | 2 | 1691.492 |
| IPI00022434 | 0.9569 | 21/ 24 | K.VFDEFKPLVEEPQ.N            | 2 | 1575.892 |
| IPI00022434 | 0.9965 | 18/ 22 | K.AVM[147.19]DDFAAF<br>VEK.C | 2 | 1360.192 |
| IPI00022434 | 0.9999 | 17/ 22 | K.AVM[147.19]DDFAAF<br>VEK.C | 2 | 1360.592 |
| IPI00022434 | 0.932  | 12/ 16 | K.QTALVELVK.H                | 1 | 1000.692 |
| IPI00022434 | 0.9772 | 12/ 16 | K.QTALVELVK.H                | 1 | 1000.592 |
| IPI00022434 | 0.997  | 16/ 32 | K.VFDEFKPLVEEPQNLIK<br>.Q    | 2 | 2044.592 |
| IPI00022434 | 0.9811 | 15/ 22 | K.AVM[147.19]DDFAAF<br>VEK.C | 2 | 1358.992 |
| IPI00022434 | 0.9844 | 12/ 14 | K.FQNALLVR.Y                 | 2 | 961.792  |

|             |        |          |                                                            |   |          |
|-------------|--------|----------|------------------------------------------------------------|---|----------|
| IPI00022434 | 0.9997 | 19/ 24   | K.QNC[160.14]ELFEQL<br>GEYK.F                              | 2 | 1658.492 |
| IPI00022434 | 0.9876 | 13/ 14   | K.FQNALLVR.Y                                               | 2 | 960.992  |
| IPI00022434 | 0.947  | 13/ 14   | K.FQNALLVR.Y                                               | 2 | 960.992  |
| IPI00022434 |        | 1 22/ 28 | K.KVPQVSTPTLVEVSR.N                                        | 2 | 1640.892 |
| IPI00022434 | 0.9973 | 19/ 26   | K.VPQVSTPTLVEVSR.N<br>K.AVM[147.19]DDFAAF                  | 2 | 1512.692 |
| IPI00022434 | 0.9996 | 17/ 22   | VEK.C                                                      | 2 | 1359.092 |
| IPI00022434 | 0.9999 | 20/ 24   | K.QNC[160.14]ELFEQL<br>GEYK.F                              | 2 | 1657.592 |
| IPI00022434 | 0.9916 | 36/ 64   | K.VFDEFKPLVEEPQNLIK<br>.Q                                  | 3 | 2046.492 |
| IPI00022434 | 0.9999 | 21/ 32   | K.VFDEFKPLVEEPQNLIK<br>.Q                                  | 2 | 2044.892 |
| IPI00022434 | 0.9893 | 13/ 14   | K.FQNALLVR.Y                                               | 2 | 960.092  |
| IPI00022434 | 0.9586 | 13/ 14   | T.PTLVEVSR.N                                               | 2 | 900.292  |
| IPI00022434 | 0.9545 | 14/ 16   | K.QTALVELVK.H                                              | 2 | 1000.192 |
| IPI00022434 |        | 1 22/ 28 | K.KVPQVSTPTLVEVSR.N                                        | 2 | 1639.792 |
| IPI00022434 | 0.9915 | 28/ 56   | K.KVPQVSTPTLVEVSR.N                                        | 3 | 1640.492 |
| IPI00022434 | 0.9989 | 20/ 26   | K.VPQVSTPTLVEVSR.N                                         | 2 | 1512.092 |
| IPI00022434 | 0.9852 | 16/ 26   | K.KVPQVSTPTLVEVS.R                                         | 2 | 1483.992 |
| IPI00022434 | 0.9947 | 13/ 18   | K.EFNAETFTFH.A                                             | 2 | 1241.492 |
| IPI00022434 | 0.9989 | 22/ 24   | C.FSALEVDETYVPK.E<br>K.AVM[147.19]DDFAAF                   | 2 | 1498.692 |
| IPI00022434 | 0.9994 | 19/ 22   | VEK.C                                                      | 2 | 1358.092 |
| IPI00022434 | 0.9676 | 18/ 22   | K.AVM[147.19]DDFAAF<br>VEK.C                               | 2 | 1361.292 |
| IPI00022434 | 0.9611 | 13/ 22   | K.AVM[147.19]DDFAAF<br>VEK.C                               | 1 | 1357.692 |
| IPI00022434 | 0.9997 | 19/ 24   | K.QNC[160.14]ELFEQL<br>GEYK.F                              | 2 | 1657.692 |
| IPI00022434 | 0.9992 | 18/ 30   | K.VFDEFKPLVEEPQNLI.<br>K                                   | 2 | 1916.792 |
| IPI00022434 | 0.9822 | 17/ 22   | K.AVMDDFAAFVEK.C<br>K.VFDEFKPLVEEPQNLIK                    | 2 | 1341.792 |
| IPI00022434 | 0.9904 | 21/ 32   | .Q                                                         | 2 | 2046.192 |
| IPI00022434 | 0.9769 | 22/ 28   | F.DEFKPLVEEPQNLIK.Q<br>K.VFDEFKPLVEEPQNLIK                 | 2 | 1798.792 |
| IPI00022434 | 0.9935 | 24/ 64   | .Q                                                         | 3 | 2046.192 |
| IPI00022434 | 0.9984 | 38/ 80   | R.M[147.19]PC[160.14]<br>]AEDYLSVVLNQLC[160.<br>14]VLHEK.T | 3 | 2535.392 |



|             |        |        |                                           |   |          |
|-------------|--------|--------|-------------------------------------------|---|----------|
| IPI00022434 | 0.9998 | 36/ 64 | K.VFDEFKPLVEEPQNLIK<br>.Q                 | 3 | 2046.092 |
| IPI00022434 | 0.9944 | 27/ 56 | K.KVPQVSTPTLVEVSR.N                       | 3 | 1641.092 |
| IPI00022434 | 0.993  | 11/ 16 | K.QTALVELVK.H                             | 2 | 1000.692 |
| IPI00022434 | 1      | 20/ 26 | K.VPQVSTPTLVEVSR.N<br>K.AVM[147.19]DDFAAF | 2 | 1512.692 |
| IPI00022434 | 0.993  | 18/ 22 | VEK.C<br>K.QNC[160.14]ELFEQL              | 2 | 1360.592 |
| IPI00022434 | 0.9981 | 15/ 24 | GEYK.F                                    | 2 | 1657.692 |
| IPI00022434 | 0.9998 | 17/ 22 | K.AVMDDFAAFVEK.C                          | 2 | 1342.292 |
| IPI00022434 | 0.9913 | 13/ 14 | K.FQNALLVR.Y                              | 2 | 961.392  |
| IPI00022434 | 0.9385 | 9/ 10  | K.TPVSDR.V<br>K.C[160.14]C[160.14]T       | 2 | 674.592  |
| IPI00022434 | 0.9992 | 15/ 16 | ESLVNR.R<br>V.VLNQLC[160.14]VLHE          | 2 | 1138.492 |
| IPI00022434 | 0.9866 | 21/ 40 | K.T                                       | 3 | 1353.092 |
| IPI00022434 | 0.9572 | 30/ 56 | K.KVPQVSTPTLVEVSR.N                       | 3 | 1640.492 |
| IPI00022434 | 0.9951 | 13/ 14 | K.FQNALLVR.Y                              | 2 | 960.792  |
| IPI00022434 | 0.9624 | 16/ 18 | P.LVEEPQNLIK.Q                            | 2 | 1181.892 |
| IPI00022434 | 0.9801 | 13/ 14 | T.PTLVEVSR.N                              | 2 | 899.892  |
| IPI00022434 | 1      | 22/ 28 | K.KVPQVSTPTLVEVSR.N                       | 2 | 1640.792 |
| IPI00022434 | 0.9575 | 13/ 16 | K.QTALVELVK.H                             | 2 | 999.992  |
| IPI00022434 | 0.9991 | 21/ 26 | K.VPQVSTPTLVEVSR.N<br>R.RPC[160.14]FSALEV | 2 | 1512.592 |
| IPI00022434 | 0.9992 | 21/ 30 | DETYVPK.E<br>E.TFTFHADIC[160.14]T         | 2 | 1910.892 |
| IPI00022434 | 0.9948 | 22/ 52 | LSEK.E<br>K.AVM[147.19]DDFAAF             | 3 | 1670.992 |
| IPI00022434 | 0.9972 | 18/ 22 | VEK.C                                     | 2 | 1359.392 |
| IPI00022434 | 0.999  | 22/ 24 | C.FSALEVDETYVPK.E<br>K.AVM[147.19]DDFAAF  | 2 | 1498.692 |
| IPI00022434 | 0.9999 | 18/ 22 | VEK.C<br>P.C[160.14]FSALEVDET             | 2 | 1358.492 |
| IPI00022434 | 0.9995 | 23/ 26 | YVPK.E<br>K.AVM[147.19]DDFAAF             | 2 | 1657.392 |
| IPI00022434 | 1      | 14/ 22 | VEK.C<br>V.M[147.19]DDFAAFVE              | 1 | 1359.592 |
| IPI00022434 | 0.9331 | 14/ 18 | K.C<br>K.AVM[147.19]DDFAAF                | 2 | 1189.492 |
| IPI00022434 | 0.9978 | 18/ 22 | VEK.C<br>K.QNC[160.14]ELFEQL              | 2 | 1361.492 |
| IPI00022434 | 0.9999 | 20/ 24 | GEYK.F<br>K.QNC[160.14]ELFEQL             | 2 | 1657.792 |
| IPI00022434 | 0.975  | 26/ 48 | GEYK.F                                    | 3 | 1658.492 |

|             |        |        |                                                            |   |          |
|-------------|--------|--------|------------------------------------------------------------|---|----------|
| IPI00022434 | 0.9988 | 24/ 28 | R.PC[160.14]FSALEVDE<br>TYVPK.E                            | 2 | 1754.592 |
| IPI00022434 | 0.984  | 25/ 72 | K.EFNAETFTFHADIC[16<br>0.14]TLSEK.E                        | 3 | 2260.292 |
| IPI00022434 | 0.9756 | 18/ 22 | K.AVM[147.19]DDFAAF<br>VEK.C                               | 2 | 1358.292 |
| IPI00022434 | 0.9996 | 17/ 22 | K.AVMDDFAAFVEK.C                                           | 2 | 1343.692 |
| IPI00022434 | 0.9994 | 18/ 24 | K.QNC[160.14]ELFEQL<br>GEYK.F                              | 2 | 1657.592 |
| IPI00022434 | 0.9993 | 21/ 28 | F.DEFKPLVEEPQNLIK.Q                                        | 2 | 1798.892 |
| IPI00022434 | 0.9999 | 21/ 32 | K.VFDEFKPLVEEPQNLIK<br>.Q                                  | 2 | 2045.092 |
| IPI00022434 | 1      | 20/ 32 | K.VFDEFKPLVEEPQNLIK<br>.Q                                  | 2 | 2048.292 |
| IPI00022434 | 0.9998 | 29/ 64 | K.VFDEFKPLVEEPQNLIK<br>.Q                                  | 3 | 2046.692 |
| IPI00022434 | 0.988  | 34/ 64 | K.VFDEFKPLVEEPQNLIK<br>.Q                                  | 3 | 2046.492 |
| IPI00022434 | 0.9623 | 16/ 20 | V.VLNQLC[160.14]VLHE<br>K.T                                | 2 | 1354.092 |
| IPI00022434 | 0.9995 | 29/ 72 | P.C[160.14]AEDYLSVVL<br>NQLC[160.14]VLHEK.T                | 3 | 2290.192 |
| IPI00022434 | 1      | 39/ 80 | R.M[147.19]PC[160.14<br>]AEDYLSVVLNQLC[160.<br>14]VLHEK.T  | 3 | 2535.392 |
| IPI00022434 | 0.9443 | 31/ 84 | K.RM[147.19]PC[160.1<br>4]AEDYLSVVLNQLC[16<br>0.14]VLHEK.T | 3 | 2691.792 |
| IPI00022434 | 0.9996 | 28/ 64 | K.VFDEFKPLVEEPQNLIK<br>.Q                                  | 3 | 2045.892 |
| IPI00022434 | 0.9926 | 15/ 22 | K.AVM[147.19]DDFAAF<br>VEK.C                               | 2 | 1359.992 |
| IPI00022434 | 0.9469 | 12/ 14 | K.FQNALLVR.Y                                               | 2 | 961.192  |
| IPI00022434 | 0.9998 | 18/ 22 | K.AVM[147.19]DDFAAF<br>VEK.C                               | 2 | 1358.692 |
| IPI00022434 | 0.9992 | 17/ 24 | K.QNC[160.14]ELFEQL<br>GEYK.F                              | 2 | 1659.992 |
| IPI00022434 | 0.9949 | 30/ 80 | R.M[147.19]PC[160.14<br>]AEDYLSVVLNQLC[160.<br>14]VLHEK.T  | 3 | 2535.392 |
| IPI00022434 | 0.9914 | 13/ 14 | K.FQNALLVR.Y                                               | 2 | 961.292  |
| IPI00022434 | 0.9999 | 33/ 64 | K.VFDEFKPLVEEPQNLIK<br>.Q                                  | 3 | 2045.692 |
| IPI00022434 | 0.9997 | 18/ 22 | K.AVM[147.19]DDFAAF<br>VEK.C                               | 2 | 1358.392 |
| IPI00022434 | 0.9999 | 30/ 64 | K.VFDEFKPLVEEPQNLIK<br>.Q                                  | 3 | 2046.992 |

|             |        |        |                                                   |   |          |
|-------------|--------|--------|---------------------------------------------------|---|----------|
|             |        |        | K.C[160.14]C[160.14]A<br>AADPHEC[160.14]YAK.<br>V | 2 | 1552.892 |
| IPI00022434 | 0.9606 | 16/ 24 |                                                   | 2 | 1128.992 |
| IPI00022434 | 0.9952 | 14/ 18 | K.KQTALVELVK.H                                    | 2 | 960.292  |
| IPI00022434 | 0.9874 | 13/ 14 | K.FQNALLVR.Y                                      | 2 | 1068.792 |
| IPI00022434 | 0.9364 | 15/ 18 | K.KVPQVSTPTL.V                                    | 2 | 900.792  |
| IPI00022434 | 0.9512 | 13/ 14 | T.PTLVEVSR.N                                      | 2 |          |
| IPI00022434 | 0.9918 | 22/ 28 | K.KVPQVSTPTLVEVSR.N                               | 2 | 1639.392 |
| IPI00022434 | 0.9587 | 15/ 16 | R.FKDLGEENF.K                                     | 2 | 1098.192 |
| IPI00022434 | 0.9772 | 13/ 14 | K.FQNALLVR.Y                                      | 2 | 961.192  |
| IPI00022434 | 0.9764 | 27/ 56 | K.KVPQVSTPTLVEVSR.N                               | 3 | 1640.192 |
| IPI00022434 | 0.9972 | 16/ 26 | K.KVPQVSTPTLVEVS.R                                | 2 | 1484.592 |
| IPI00022434 | 0.9997 | 22/ 26 | K.VPQVSTPTLVEVSR.N                                | 2 | 1511.692 |
| IPI00022434 | 0.9924 | 16/ 26 | K.KVPQVSTPTLVEVS.R                                | 2 | 1483.592 |
| IPI00022434 | 0.9979 | 19/ 24 | K.KVPQVSTPTLVEV.S<br>R.RPC[160.14]FSALEV          | 2 | 1397.792 |
| IPI00022434 | 0.9946 | 16/ 30 | DETYVPK.E                                         | 2 | 1910.692 |
| IPI00022434 | 0.9952 | 22/ 24 | C.FSALEVDETYVPK.E                                 | 2 | 1498.692 |
| IPI00022434 | 0.9974 | 23/ 26 | P.C[160.14]FSALEVDET<br>YVPK.E                    | 2 | 1658.492 |
| IPI00022434 | 0.9546 | 14/ 22 | K.AVM[147.19]DDFAAF<br>VEK.C                      | 1 | 1357.592 |
| IPI00022434 | 0.9987 | 18/ 22 | K.AVM[147.19]DDFAAF<br>VEK.C                      | 2 | 1358.492 |
| IPI00022434 | 0.9988 | 20/ 24 | K.QNC[160.14]ELFEQL<br>GEYK.F                     | 2 | 1658.992 |
| IPI00022434 | 0.9865 | 22/ 48 | K.QNC[160.14]ELFEQL<br>GEYK.F                     | 3 | 1658.892 |
| IPI00022434 | 0.9999 | 34/ 64 | K.VFDEFKPLVEEPQNLIK<br>.Q                         | 3 | 2046.292 |
| IPI00022434 | 0.9929 | 19/ 28 | K.VFDEFKPLVEEPQNL.I                               | 2 | 1803.892 |
| IPI00022434 | 0.994  | 17/ 22 | K.AVMDDFAAFVEK.C<br>K.QNC[160.14]ELFEQL           | 2 | 1342.892 |
| IPI00022434 | 0.9963 | 19/ 22 | GEYK.K<br>K.VFDEFKPLVEEPQNLIK                     | 2 | 1531.492 |
| IPI00022434 | 0.9939 | 35/ 64 | .Q<br>K.VFDEFKPLVEEPQNLIK                         | 3 | 2046.592 |
| IPI00022434 | 0.9499 | 21/ 32 | .Q                                                | 2 | 2045.992 |
| IPI00022434 | 0.9983 | 19/ 28 | F.DEFKPLVEEPQNLIK.Q<br>K.VFDEFKPLVEEPQNLIK        | 2 | 1798.792 |
| IPI00022434 | 0.9987 | 27/ 64 | .Q                                                | 3 | 2046.192 |

|             |        |        |                                                              |   |          |
|-------------|--------|--------|--------------------------------------------------------------|---|----------|
| IPI00022434 | 0.9637 | 17/ 30 | K.VFDEFKPLVEEPQNLI.<br>K                                     | 2 | 1917.092 |
| IPI00022434 | 0.9599 | 27/ 72 | K.EFNAETFTFHADIC[16<br>0.14]TLSEK.E                          | 3 | 2260.992 |
| IPI00022434 | 0.9979 | 19/ 30 | K.VFDEFKPLVEEPQNLI.<br>K                                     | 2 | 1917.392 |
| IPI00022434 | 0.9929 | 19/ 30 | K.VFDEFKPLVEEPQNLI.<br>K                                     | 2 | 1917.892 |
| IPI00022434 | 0.9983 | 26/ 64 | K.VFDEFKPLVEEPQNLIK<br>.Q                                    | 3 | 2046.392 |
| IPI00022434 | 0.9937 | 13/ 14 | K.FQNALLVR.Y                                                 | 2 | 961.192  |
| IPI00022434 | 0.9597 | 20/ 40 | T.AFHDNEETFLK.K                                              | 3 | 1350.692 |
| IPI00022434 | 0.9971 | 14/ 16 | K.SLHTLFGDK.L                                                | 2 | 1017.492 |
| IPI00022434 | 0.9964 | 14/ 18 | K.LVNEVTEFAK.T                                               | 2 | 1149.192 |
| IPI00022434 | 0.9973 | 23/ 44 | C.TAFHDNEETFLK.K                                             | 3 | 1452.292 |
| IPI00022434 | 0.9995 | 16/ 18 | K.LVNEVTEFAK.T                                               | 2 | 1148.292 |
| IPI00022434 | 0.9932 | 13/ 18 | K.LVNEVTEFAK.T                                               | 1 | 1148.592 |
| IPI00022434 | 0.9959 | 15/ 18 | K.LVNEVTEFAK.T                                               | 2 | 1151.992 |
| IPI00022434 | 0.9987 | 16/ 18 | K.LVNEVTEFAK.T                                               | 2 | 1149.192 |
| IPI00022434 | 0.9983 | 16/ 18 | K.LVNEVTEFAK.T                                               | 2 | 1149.392 |
| IPI00022434 | 0.9714 | 13/ 18 | K.LVNEVTEFAK.T                                               | 1 | 1149.492 |
| IPI00022434 | 0.9979 | 15/ 18 | K.LVNEVTEFAK.T                                               | 2 | 1149.792 |
| IPI00022434 | 0.9994 | 16/ 18 | K.LVNEVTEFAK.T                                               | 2 | 1151.292 |
| IPI00022434 | 0.9969 | 16/ 18 | K.LVNEVTEFAK.T                                               | 2 | 1150.892 |
| IPI00022434 | 0.9999 | 16/ 18 | K.LVNEVTEFAK.T                                               | 2 | 1150.092 |
| IPI00022434 | 0.9896 | 13/ 18 | K.LVNEVTEFAK.T                                               | 1 | 1148.492 |
| IPI00022434 | 0.9997 | 15/ 18 | K.LVNEVTEFAK.T                                               | 2 | 1149.692 |
| IPI00022434 | 0.9932 | 14/ 18 | K.LVNEVTEFAK.T                                               | 1 | 1148.692 |
| IPI00022434 | 0.9813 | 12/ 18 | K.LVNEVTEFAK.T<br>K.SLHTLFGDKLC[160.1<br>4]TVAT.L            | 1 | 1150.592 |
| IPI00022434 | 0.9031 | 19/ 28 | K.SLHTLFGDKLC[160.1<br>4]TVATLR.E                            | 2 | 1662.592 |
| IPI00022434 | 0.9982 | 29/ 64 | K.SLHTLFGDKLC[160.1<br>4]TVATLR.E                            | 3 | 1932.892 |
| IPI00022434 | 0.9983 | 29/ 64 | K.SLHTLFGDKLC[160.1<br>4]TVATLR.E                            | 3 | 1933.192 |
| IPI00022434 | 0.9994 | 21/ 30 | K.SLHTLFGDKLC[160.1<br>4]TVATL.R                             | 2 | 1778.792 |
| IPI00022434 | 0.9401 | 19/ 24 | K.ALVLIAFAQYLQQ.C                                            | 2 | 1477.692 |
| IPI00022434 | 0.9999 | 16/ 18 | K.LVNEVTEFAK.T                                               | 2 | 1150.492 |
| IPI00022434 | 0.9905 | 12/ 18 | K.LVNEVTEFAK.T<br>K.ALVLIAFAQYLQQC[16<br>0.14]PFEDHVK.L      | 1 | 1148.592 |
| IPI00022434 | 0.9759 | 22/ 80 | R.NEC[160.14]FLQHK.<br>D                                     | 3 | 2492.492 |
| IPI00022434 | 0.9954 | 11/ 14 | K.DDNPMLPR.L                                                 | 2 | 940.492  |
| IPI00022434 | 0.9392 | 11/ 14 | R.NEC[160.14]FLQHK.<br>D                                     | 2 | 1075.992 |
| IPI00022434 | 0.9114 | 11/ 14 | K.LC[160.14]TVATLR.E<br>R.LVRPEVDVM[147.19]<br>C[160.14]TA.F | 2 | 934.492  |
| IPI00022434 | 0.9919 | 15/ 22 |                                                              | 2 | 1405.392 |

|             |        |        |                                       |   |          |
|-------------|--------|--------|---------------------------------------|---|----------|
| IPI00022434 | 0.9917 | 14/ 18 | K.LVNEVTEFAK.T                        | 2 | 1150.392 |
| IPI00022434 | 0.9823 | 13/ 18 | K.LVNEVTEFAK.T                        | 1 | 1150.692 |
| IPI00022434 | 0.9929 | 13/ 18 | K.LVNEVTEFAK.T                        | 1 | 1148.692 |
| IPI00022434 | 1      | 16/ 18 | K.LVNEVTEFAK.T                        | 2 | 1149.592 |
| IPI00022434 | 0.999  | 16/ 18 | K.LVNEVTEFAK.T                        | 2 | 1150.092 |
| IPI00022434 | 0.9984 | 18/ 24 | R.LVRPEVDVM[147.19]<br>C[160.14]TAF.H | 2 | 1552.392 |
| IPI00022434 | 0.9804 | 18/ 24 | K.SLHTLFGDKLC[160.1<br>4]TV.A         | 2 | 1490.592 |
| IPI00022434 | 0.998  | 26/ 64 | K.SLHTLFGDKLC[160.1<br>4]TVATLR.E     | 3 | 1932.092 |
| IPI00022434 | 0.9978 | 31/ 64 | K.SLHTLFGDKLC[160.1<br>4]TVATLR.E     | 3 | 1933.792 |
| IPI00022434 | 0.9982 | 32/ 64 | K.SLHTLFGDKLC[160.1<br>4]TVATLR.E     | 3 | 1932.492 |
| IPI00022434 | 0.9855 | 21/ 30 | K.SLHTLFGDKLC[160.1<br>4]TVATL.R      | 2 | 1776.792 |
| IPI00022434 | 0.9988 | 21/ 30 | K.SLHTLFGDKLC[160.1<br>4]TVATL.R      | 2 | 1776.792 |
| IPI00022434 | 0.9588 | 17/ 24 | K.ALVLIAFAQYLQQ.C                     | 2 | 1478.192 |
| IPI00022434 | 0.9444 | 11/ 12 | R.NEC[160.14]FLQH.K                   | 2 | 947.492  |
| IPI00022434 | 0.9903 | 30/ 80 | K.QEPERNEC[160.14]FL<br>QHKDDNPNLPR.L | 3 | 2637.492 |
| IPI00022434 | 0.9882 | 14/ 22 | R.LVRPEVDVM[147.19]<br>C[160.14]TA.F  | 2 | 1406.592 |
| IPI00022434 | 0.9911 | 13/ 18 | K.LVNEVTEFAK.T                        | 1 | 1148.592 |
| IPI00022434 | 1      | 13/ 18 | K.LVNEVTEFAK.T                        | 1 | 1150.692 |
| IPI00022434 | 0.9997 | 16/ 18 | K.LVNEVTEFAK.T                        | 2 | 1149.592 |
| IPI00022434 | 0.9991 | 16/ 18 | K.LVNEVTEFAK.T                        | 2 | 1149.592 |
| IPI00022434 | 0.9056 | 19/ 28 | K.SLHTLFGDKLC[160.1<br>4]TVAT.L       | 2 | 1662.692 |
| IPI00022434 | 0.9495 | 18/ 26 | K.SLHTLFGDKLC[160.1<br>4]TVA.T        | 2 | 1561.492 |
| IPI00022434 | 1      | 18/ 30 | K.SLHTLFGDKLC[160.1<br>4]TVATL.R      | 2 | 1775.892 |
| IPI00022434 | 0.9998 | 21/ 30 | K.SLHTLFGDKLC[160.1<br>4]TVATL.R      | 2 | 1776.792 |
| IPI00022434 | 0.9871 | 15/ 18 | K.LVNEVTEFAK.T                        | 2 | 1148.592 |
| IPI00022434 | 0.9956 | 18/ 40 | R.LAKTYETTLEK.C                       | 3 | 1297.792 |
| IPI00022434 | 0.9983 | 14/ 16 | S.LAADFVESK.D                         | 2 | 979.192  |
| IPI00022434 | 0.9886 | 25/ 40 | R.FPKAEFAEVSK.L                       | 3 | 1252.592 |
| IPI00022434 | 0.9877 | 11/ 12 | K.LVTDLTK.V                           | 2 | 789.292  |
| IPI00022434 | 0.9997 | 19/ 24 | K.DVFLGM[147.19]FLYE<br>YAR.R         | 2 | 1639.992 |
| IPI00022434 | 0.9998 | 19/ 24 | K.DVFLGM[147.19]FLYE<br>YAR.R         | 2 | 1639.192 |
| IPI00022434 | 0.9982 | 17/ 24 | K.DVFLGM[147.19]FLYE<br>YAR.R         | 2 | 1640.592 |

|             |        |        |                                             |   |          |
|-------------|--------|--------|---------------------------------------------|---|----------|
| IPI00022434 | 0.9997 | 19/ 24 | K.DVFLGM[147.19]FLYE<br>YAR.R               | 2 | 1640.992 |
| IPI00022434 | 0.9938 | 17/ 20 | R.HPDYSVLLLLR.L                             | 2 | 1311.792 |
| IPI00022434 | 0.9947 | 28/ 56 | K.AEFAEVSKLVTDLTK.V<br>M.PADLPSLAADFVESK.   | 3 | 1652.292 |
| IPI00022434 | 0.9875 | 25/ 28 | D<br>K.DVFLGM[147.19]FLYE                   | 2 | 1561.092 |
| IPI00022434 | 0.9998 | 19/ 24 | YAR.R<br>K.DVFLGM[147.19]FLYE               | 2 | 1639.592 |
| IPI00022434 | 1      | 27/ 48 | YAR.R<br>K.DVFLGM[147.19]FLYE               | 3 | 1640.992 |
| IPI00022434 | 0.9955 | 18/ 24 | YAR.R<br>K.DVFLGM[147.19]FLYE               | 2 | 1642.692 |
| IPI00022434 | 0.9812 | 18/ 24 | YAR.R<br>K.DVFLGM[147.19]FLYE               | 2 | 1639.292 |
| IPI00022434 | 0.9988 | 19/ 24 | YAR.R<br>K.DVFLGM[147.19]FLYE               | 2 | 1641.092 |
| IPI00022434 | 0.9965 | 19/ 24 | YAR.R<br>K.DVFLGM[147.19]FLYE               | 2 | 1640.892 |
| IPI00022434 | 0.9998 | 19/ 24 | YAR.R<br>K.DVFLGM[147.19]FLYE               | 2 | 1640.792 |
| IPI00022434 | 0.999  | 19/ 24 | YAR.R<br>K.DVFLGM[147.19]FLYE               | 2 | 1640.692 |
| IPI00022434 | 0.9997 | 19/ 24 | YAR.R<br>K.DVFLGM[147.19]FLYE               | 2 | 1640.792 |
| IPI00022434 | 0.9649 | 15/ 22 | YA.R                                        | 2 | 1483.992 |
| IPI00022434 | 0.9256 | 10/ 14 | K.TYETTLEK.C<br>K.LKEC[160.14]C[160.        | 2 | 984.892  |
| IPI00022434 | 0.9926 | 23/ 44 | 14]EKPLLEK.S<br>K.YIC[160.14]ENQDSIS        | 3 | 1547.492 |
| IPI00022434 | 0.9992 | 20/ 22 | SK.L                                        | 2 | 1443.192 |
| IPI00022434 | 0.9046 | 9/ 12  | K.LVTDLTK.V                                 | 1 | 788.692  |
| IPI00022434 | 0.9998 | 27/ 44 | R.RHPDYSVLLLLR.L                            | 3 | 1468.992 |
| IPI00022434 | 0.9718 | 24/ 40 | R.HPDYSVLLLLR.L                             | 3 | 1312.892 |
| IPI00022434 | 0.9248 | 17/ 20 | R.HPDYSVLLLLR.L<br>M.PADLPSLAADFVESK.       | 2 | 1313.092 |
| IPI00022434 | 0.9982 | 25/ 28 | D                                           | 2 | 1560.692 |
| IPI00022434 | 0.9834 | 29/ 56 | K.AEFAEVSKLVTDLTK.V<br>K.DVFLGM[147.19]FLYE | 3 | 1652.092 |
| IPI00022434 | 0.9997 | 20/ 24 | YAR.R<br>K.DVFLGM[147.19]FLYE               | 2 | 1640.892 |
| IPI00022434 | 0.9651 | 19/ 24 | YAR.R<br>K.DVFLGM[147.19]FLYE               | 2 | 1640.692 |
| IPI00022434 | 0.9998 | 19/ 24 | YAR.R<br>K.DVFLGM[147.19]FLYE               | 2 | 1639.992 |
| IPI00022434 | 1      | 19/ 24 | YAR.R                                       | 2 | 1640.392 |

|             |        |        |                                                         |   |          |
|-------------|--------|--------|---------------------------------------------------------|---|----------|
| IPI00022434 | 1      | 18/ 24 | K.DVFLGM[147.19]FLYE<br>YAR.R                           | 2 | 1641.592 |
| IPI00022434 | 1      | 19/ 24 | K.DVFLGM[147.19]FLYE<br>YAR.R                           | 2 | 1640.592 |
| IPI00022434 | 0.9992 | 19/ 24 | K.DVFLGM[147.19]FLYE<br>YAR.R                           | 2 | 1639.892 |
| IPI00022434 | 0.9655 | 10/ 14 | K.AEFAEVSK.L                                            | 1 | 879.692  |
| IPI00022434 | 0.913  | 24/ 44 | K.LKEC[160.14]C[160.<br>14]EKPLLEK.S                    | 3 | 1548.492 |
| IPI00022434 | 0.9153 | 9/ 12  | K.LVTDLTK.V                                             | 1 | 788.892  |
| IPI00022434 | 0.9765 | 16/ 20 | R.HPDYSVLLLLR.L                                         | 2 | 1311.792 |
| IPI00022434 | 0.9998 | 19/ 24 | K.DVFLGM[147.19]FLYE<br>YAR.R                           | 2 | 1639.292 |
| IPI00022434 | 0.9979 | 28/ 48 | K.DVFLGM[147.19]FLYE<br>YAR.R                           | 3 | 1640.492 |
| IPI00022434 | 0.9844 | 15/ 18 | K.DVFLGM[147.19]FLYE<br>.Y                              | 2 | 1248.892 |
| IPI00022434 | 0.9997 | 19/ 24 | K.DVFLGM[147.19]FLYE<br>YAR.R                           | 2 | 1639.992 |
| IPI00022434 | 0.9506 | 18/ 22 | K.DVFLGM[147.19]FLYE<br>YA.R                            | 2 | 1483.592 |
| IPI00022434 | 0.9991 | 19/ 24 | K.DVFLGM[147.19]FLYE<br>YAR.R                           | 2 | 1638.992 |
| IPI00022434 | 0.9998 | 18/ 24 | K.DVFLGM[147.19]FLYE<br>YAR.R                           | 2 | 1639.592 |
| IPI00022434 | 0.9951 | 13/ 14 | K.KYLYEIAR.R                                            | 2 | 1054.692 |
| IPI00022434 | 0.9325 | 9/ 12  | K.YLYEIAR.R                                             | 1 | 926.492  |
| IPI00022434 | 0.9947 | 11/ 12 | K.YLYEIAR.R                                             | 2 | 927.392  |
| IPI00022434 | 0.9799 | 12/ 12 | K.YLYEIAR.R                                             | 2 | 926.892  |
| IPI00022434 | 0.9892 | 11/ 12 | K.YLYEIAR.R                                             | 2 | 927.892  |
| IPI00022434 | 0.9885 | 11/ 12 | K.YLYEIAR.R                                             | 2 | 927.692  |
| IPI00022434 | 0.9992 | 28/ 72 | K.AAFTEC[160.14]C[16<br>0.14]QAADKAAC[160.1<br>4]LLPK.L | 3 | 2125.092 |
| IPI00022434 | 0.9999 | 24/ 36 | K.AAFTEC[160.14]C[16<br>0.14]QAADKAAC[160.1<br>4]LLPK.L | 2 | 2124.592 |
| IPI00022434 | 0.9994 | 27/ 52 | R.HPYFYAPELLFFAK.R                                      | 3 | 1744.792 |
| IPI00022434 | 0.9929 | 21/ 26 | R.HPYFYAPELLFFAK.R                                      | 2 | 1743.792 |
| IPI00022434 | 0.941  | 18/ 24 | H.PYFYAPELLFFAK.R                                       | 2 | 1605.892 |
| IPI00022434 | 0.9864 | 31/ 72 | K.AAFTEC[160.14]C[16<br>0.14]QAADKAAC[160.1<br>4]LLPK.L | 3 | 2126.192 |
| IPI00022434 | 0.9999 | 16/ 22 | K.AAFTEC[160.14]C[16<br>0.14]QAADK.A                    | 2 | 1370.992 |
| IPI00022434 | 0.9221 | 11/ 12 | K.AAC[160.14]LLPK.L                                     | 2 | 771.492  |
| IPI00022434 | 0.9669 | 12/ 12 | K.YLYEIAR.R                                             | 2 | 927.392  |

|             |        |        |                                                   |   |          |
|-------------|--------|--------|---------------------------------------------------|---|----------|
| IPI00022434 | 0.999  | 25/ 72 | K.AAFTEC[160.14]C[160.14]QAADKAAC[160.14]LLPK.L   | 3 | 2125.592 |
| IPI00022434 | 0.9991 | 29/ 72 | K.AAFTEC[160.14]C[160.14]QAADKAAC[160.14]LLPK.L   | 3 | 2125.392 |
| IPI00022434 | 1      | 24/ 36 | K.AAFTEC[160.14]C[160.14]QAADKAAC[160.14]LLPK.L   | 2 | 2125.092 |
| IPI00022434 | 0.9692 | 26/ 76 | K.AAFTEC[160.14]C[160.14]QAADKAAC[160.14]LLPKL.D  | 3 | 2239.892 |
| IPI00022434 | 0.9999 | 34/ 80 | R.YKAAFTEC[160.14]C[160.14]QAADKAAC[160.14]LLPK.L | 3 | 2416.392 |
| IPI00022434 | 0.9995 | 16/ 20 | Y.FYAPELLFFAK.R                                   | 2 | 1345.792 |
| IPI00022434 | 0.9931 | 28/ 52 | R.HPYFYAPELLFFAK.R                                | 3 | 1744.292 |
| IPI00022434 | 1      | 27/ 56 | R.HPYFYAPELLFFAKR.Y                               | 3 | 1900.892 |
| IPI00022434 | 0.9875 | 20/ 22 | P.YFYAPELLFFAK.R                                  | 2 | 1509.992 |
| IPI00022434 | 0.9979 | 11/ 12 | K.YLYEIAR.R                                       | 2 | 927.492  |
| IPI00022434 | 0.9925 | 12/ 12 | K.YLYEIAR.R                                       | 2 | 927.592  |
| IPI00022434 | 0.9477 | 11/ 12 | K.AAC[160.14]LLPK.L                               | 2 | 772.892  |
| IPI00022434 | 0.9984 | 11/ 12 | K.YLYEIAR.R                                       | 2 | 927.792  |
| IPI00022434 | 0.9994 | 24/ 72 | K.AAFTEC[160.14]C[160.14]QAADKAAC[160.14]LLPK.L   | 3 | 2125.492 |
| IPI00022434 | 0.9032 | 28/ 72 | K.AAFTEC[160.14]C[160.14]QAADKAAC[160.14]LLPK.L   | 3 | 2127.092 |
| IPI00022434 | 0.9999 | 36/ 80 | R.YKAAFTEC[160.14]C[160.14]QAADKAAC[160.14]LLPK.L | 3 | 2416.692 |
| IPI00022434 | 0.9994 | 31/ 72 | K.AAFTEC[160.14]C[160.14]QAADKAAC[160.14]LLPK.L   | 3 | 2126.092 |
| IPI00022434 | 0.9957 | 32/ 76 | K.AAFTEC[160.14]C[160.14]QAADKAAC[160.14]LLPKL.D  | 3 | 2239.492 |
| IPI00022434 | 1      | 22/ 36 | K.AAFTEC[160.14]C[160.14]QAADKAAC[160.14]LLPK.L   | 2 | 2125.892 |
| IPI00022434 | 0.9818 | 19/ 32 | A.FTEC[160.14]C[160.14]QAADKAAC[160.14]LLPK.L     | 2 | 1982.792 |
| IPI00022434 | 0.9998 | 16/ 20 | Y.FYAPELLFFAK.R                                   | 2 | 1345.192 |
| IPI00022434 | 0.9995 | 20/ 22 | P.YFYAPELLFFAK.R                                  | 2 | 1508.692 |



|             |        |        |                                           |   |          |
|-------------|--------|--------|-------------------------------------------|---|----------|
| IPI00022463 | 0.999  | 17/ 18 | K.DSGFQM[147.19]NQL<br>R.G                | 2 | 1212.192 |
| IPI00022463 | 0.9231 | 11/ 14 | K.YLGEEYVK.A                              | 2 | 1000.492 |
| IPI00022463 | 0.9963 | 15/ 20 | K.EGYGYTGAFR.C                            | 2 | 1284.092 |
| IPI00022463 | 0.9302 | 14/ 20 | K.SASDLTWDNLK.G<br>K.M[147.19]YLGYEYVT    | 2 | 1249.592 |
| IPI00022463 | 1      | 19/ 22 | AIR.N                                     | 2 | 1495.692 |
| IPI00022463 | 0.986  | 15/ 26 | K.EDPQTFYYAVAVVK.K<br>K.SVIPSDGPSVAC[160. | 2 | 1629.892 |
| IPI00022463 | 0.9881 | 15/ 26 | 14]VK.K<br>K.M[147.19]YLGYEYVT            | 2 | 1416.692 |
| IPI00022463 | 0.9988 | 20/ 22 | AIR.N<br>K.IEC[160.14]VSAETTE             | 2 | 1494.892 |
| IPI00022463 | 0.9902 | 23/ 28 | DC[160.14]IAK.I<br>R.C[160.14]LVEKGDVA    | 2 | 1725.392 |
| IPI00022463 | 0.996  | 25/ 44 | FVK.H<br>K.SVIPSDGPSVAC[160.              | 3 | 1366.092 |
| IPI00022463 | 0.9983 | 17/ 26 | 14]VK.K                                   | 2 | 1415.692 |
| IPI00022463 | 0.978  | 13/ 18 | E.GYYGYTGAFR.C<br>I.PSDGPSVAC[160.14]     | 2 | 1154.292 |
| IPI00022463 | 0.9716 | 17/ 20 | VK.K                                      | 2 | 1117.992 |
| IPI00022463 | 0.9996 | 18/ 20 | K.EGYGYTGAFR.C                            | 2 | 1283.492 |
| IPI00022463 | 0.9999 | 16/ 20 | K.SASDLTWDNLK.G<br>R.FDEFFSEGC[160.14]    | 2 | 1249.592 |
| IPI00022463 | 0.9974 | 19/ 26 | APGSK.K<br>K.M[147.19]YLGYEYVT            | 2 | 1577.492 |
| IPI00022463 | 0.9982 | 20/ 22 | AIR.N                                     | 2 | 1496.292 |
| IPI00022463 | 0.999  | 23/ 26 | K.EDPQTFYYAVAVVK.K<br>R.TAGWNIPM[147.19]G | 2 | 1629.992 |
| IPI00022463 | 0.9982 | 17/ 26 | LLYNK.I                                   | 2 | 1593.692 |
| IPI00022463 | 0.9976 | 13/ 14 | K.YLGEEYVK.A<br>K.SVIPSDGPSVAC[160.       | 2 | 1000.192 |
| IPI00022463 | 0.9881 | 12/ 26 | 14]VK.K<br>R.C[160.14]LVEKGDVA            | 2 | 1415.392 |
| IPI00022463 | 0.9992 | 25/ 44 | FVK.H<br>K.M[147.19]YLGYEYVT              | 3 | 1365.992 |
| IPI00022463 | 0.9997 | 20/ 22 | AIR.N<br>K.M[147.19]YLGYEYVT              | 2 | 1494.792 |
| IPI00022463 | 0.9999 | 20/ 22 | AIR.N                                     | 2 | 1495.092 |
| IPI00022463 | 0.9235 | 11/ 14 | K.DSAHGFLK.V<br>R.WC[160.14]AVSEHEA       | 2 | 874.892  |
| IPI00022463 | 0.9562 | 17/ 40 | TK.C<br>K.IEC[160.14]VSAETTE              | 3 | 1318.692 |
| IPI00022463 | 0.9878 | 22/ 28 | DC[160.14]IAK.I<br>R.C[160.14]LVEKGDVA    | 2 | 1725.492 |
| IPI00022463 | 0.9987 | 26/ 44 | FVK.H                                     | 3 | 1365.992 |

|             |        |        |                                           |   |          |
|-------------|--------|--------|-------------------------------------------|---|----------|
| IPI00022463 | 0.9995 | 16/ 22 | R.C[160.14]LVEKGDVA<br>FVK.H              | 2 | 1364.592 |
| IPI00022463 | 0.9981 | 17/ 26 | K.SVIPSDGPSVAC[160.<br>14]VK.K            | 2 | 1415.592 |
| IPI00022463 | 0.9742 | 15/ 18 | E.GYYGYTGAFR.C                            | 2 | 1154.192 |
| IPI00022463 | 0.9985 | 17/ 20 | K.EGYYGYTGAFR.C                           | 2 | 1284.792 |
| IPI00022463 | 0.9286 | 16/ 20 | K.SASDLTWDNLK.G                           | 2 | 1248.892 |
| IPI00022463 | 0.9687 | 26/ 48 | D.PQTFYYAVAVVK.D<br>K.C[160.14]STSSLLEAC  | 3 | 1514.592 |
| IPI00022463 | 0.9996 | 21/ 24 | [160.14]TFR.R<br>R.FDEFFSEGC[160.14]      | 2 | 1532.892 |
| IPI00022463 | 0.9901 | 24/ 26 | APGSK.K                                   | 2 | 1578.492 |
| IPI00022463 | 0.9985 | 20/ 22 | D.PQTFYYAVAVVK.K<br>K.DLLFRDDTVC[160.14]  | 2 | 1385.592 |
| IPI00022463 | 0.9968 | 19/ 24 | ]LAK.L<br>K.M[147.19]YLGYEYVT             | 2 | 1565.792 |
| IPI00022463 | 1      | 20/ 22 | AIR.N                                     | 2 | 1493.992 |
| IPI00022463 | 0.9738 | 18/ 22 | K.MYLGYEYVTAIR.N                          | 2 | 1477.792 |
| IPI00022463 | 0.9733 | 19/ 22 | D.PQTFYYAVAVVK.K                          | 2 | 1387.792 |
| IPI00022463 | 0.9997 | 20/ 22 | K.MYLGYEYVTAIR.N                          | 2 | 1479.792 |
| IPI00022463 | 0.9989 | 22/ 26 | K.EDPQTFYYAVAVVK.K                        | 2 | 1629.592 |
| IPI00022463 | 1      | 31/ 52 | K.EDPQTFYYAVAVVK.K<br>R.TAGWNIPM[147.19]G | 3 | 1630.492 |
| IPI00022463 | 0.9432 | 19/ 26 | LLYNK.I<br>R.SAGWNIPIGLLYC[160            | 2 | 1593.792 |
| IPI00022463 | 0.9967 | 35/ 72 | .14]DLPEPR.K<br>K.M[147.19]YLGYEYVT       | 3 | 2173.092 |
| IPI00022463 | 0.9988 | 19/ 22 | AIR.N<br>K.DSGFQM[147.19]NQL              | 2 | 1494.292 |
| IPI00022463 | 0.977  | 16/ 18 | R.G<br>K.IEC[160.14]VSAETTE               | 2 | 1211.892 |
| IPI00022463 | 0.9996 | 23/ 28 | DC[160.14]IAK.I<br>R.C[160.14]LVEKGDVA    | 2 | 1725.692 |
| IPI00022463 | 0.9972 | 17/ 22 | FVK.H<br>I.PSDGPSVAC[160.14]              | 2 | 1365.792 |
| IPI00022463 | 1      | 13/ 20 | VK.K<br>R.C[160.14]LVEKGDVA               | 1 | 1115.592 |
| IPI00022463 | 0.9959 | 27/ 44 | FVK.H<br>K.SVIPSDGPSVAC[160.              | 3 | 1366.192 |
| IPI00022463 | 0.9942 | 16/ 26 | 14]VK.K                                   | 2 | 1416.492 |
| IPI00022463 | 0.9989 | 18/ 20 | K.EGYYGYTGAFR.C                           | 2 | 1283.892 |
| IPI00022463 | 1      | 17/ 20 | K.SASDLTWDNLK.G<br>R.FDEFFSEGC[160.14]    | 2 | 1249.192 |
| IPI00022463 | 1      | 24/ 26 | APGSK.K<br>K.C[160.14]STSSLLEAC           | 2 | 1577.492 |
| IPI00022463 | 0.9456 | 21/ 24 | [160.14]TFR.R                             | 2 | 1531.092 |
| IPI00022463 | 0.9988 | 20/ 22 | D.PQTFYYAVAVVK.K                          | 2 | 1386.592 |

|             |        |        |                                           |   |          |
|-------------|--------|--------|-------------------------------------------|---|----------|
| IPI00022463 | 0.9971 | 20/ 22 | K.M[147.19]YLGYEYVT<br>AIR.N              | 2 | 1497.592 |
| IPI00022463 | 0.9998 | 20/ 22 | K.M[147.19]YLGYEYVT<br>AIR.N              | 2 | 1493.892 |
| IPI00022463 | 0.9961 | 25/ 52 | K.EDPQTFYYAVAVVK.K                        | 3 | 1630.492 |
| IPI00022463 | 0.9989 | 23/ 26 | K.EDPQTFYYAVAVVK.K                        | 2 | 1628.892 |
| IPI00022463 | 0.9998 | 20/ 22 | K.MYLGYEYVTAIR.N                          | 2 | 1478.692 |
| IPI00022463 | 0.9888 | 19/ 26 | R.TAGWNIPM[147.19]G<br>LLYNK.I            | 2 | 1594.792 |
| IPI00022488 | 1      | 28/ 56 | N.VAEGETKPPDPVTER.<br>C                   | 3 | 1642.992 |
| IPI00022488 | 0.9998 | 34/ 68 | A.HGNVAEGETKPPDPVT<br>ER.C                | 3 | 1951.192 |
| IPI00022488 | 0.9805 | 28/ 64 | H.GNVAEGETKPPDPVTE<br>R.C                 | 3 | 1815.292 |
| IPI00022488 | 0.993  | 16/ 20 | K.GGYTLVSGYPK.R                           | 2 | 1141.592 |
| IPI00022488 | 0.9623 | 18/ 20 | K.NFPSPVDAAFR.Q                           | 2 | 1220.292 |
| IPI00022488 | 0.9753 | 15/ 18 | R.YYC[160.14]FQGNQF<br>L.R                | 2 | 1340.892 |
| IPI00022488 | 0.9889 | 27/ 44 | K.EVGTPHGIILDSVDAA<br>FIC[160.14]PGSS.R   | 2 | 2341.892 |
| IPI00022875 | 0.9139 | 25/ 56 | D.VAGLFLANSSEALER.A                       | 3 | 1577.292 |
| IPI00022895 | 0.9951 | 17/ 20 | R.ATWSGAVLAGR.D                           | 2 | 1088.092 |
| IPI00022895 | 1      | 39/ 64 | K.VTLTC[160.14]VAPLS<br>GVDFQLR.R         | 3 | 1876.992 |
| IPI00022895 | 0.9664 | 16/ 30 | K.NGVAQEPVHLDSPAIK<br>.H                  | 2 | 1677.392 |
| IPI00022895 | 0.997  | 14/ 18 | R.LETPDFQLFK.N                            | 2 | 1237.792 |
| IPI00022895 | 0.9623 | 21/ 38 | K.SLPAPWLSM[147.19]<br>APVSWITPGLK.T      | 2 | 2166.492 |
| IPI00022895 | 0.9745 | 31/ 76 | K.SLPAPWLSM[147.19]<br>APVSWITPGLK.T      | 3 | 2166.792 |
| IPI00022895 | 0.9981 | 24/ 38 | K.SLPAPWLSM[147.19]<br>APVSWITPGLK.T      | 2 | 2169.592 |
| IPI00022974 | 0.9094 | 16/ 18 | R.FYTIEILKVE.-                            | 2 | 1255.492 |
| IPI00022974 | 0.9868 | 14/ 16 | Q.IAAVVDVIR.E                             | 2 | 955.292  |
| IPI00022974 | 0.9175 | 17/ 36 | K.IIIKNFDIPK.S                            | 3 | 1201.992 |
| IPI00022974 | 0.9778 | 13/ 18 | S.IPLQGAFNYK.Y                            | 2 | 1150.492 |
| IPI00022974 | 0.9944 | 19/ 24 | L.ISSIPLQGAFNYK.Y<br>R.ELGIC[160.14]PDDAA | 2 | 1437.592 |
| IPI00022974 | 0.9981 | 24/ 28 | VIPIK.N                                   | 2 | 1610.892 |
| IPI00022974 | 0.9704 | 23/ 28 | R.ELGIC[160.14]PDDAA<br>VIPIK.N           | 2 | 1611.192 |
| IPI00022974 | 0.9738 | 19/ 28 | R.ELGIC[160.14]PDDAA<br>VIPIK.N           | 2 | 1611.492 |
| IPI00022974 | 0.992  | 19/ 22 | R.TVQIAAVVDVIR.E                          | 2 | 1282.892 |

|             |        |          |                                              |   |          |
|-------------|--------|----------|----------------------------------------------|---|----------|
| IPI00022974 | 0.9992 | 30/ 72   | K.SVRPNDEVTAVLAVQT<br>ELK.E                  | 3 | 2071.392 |
| IPI00022974 | 0.9969 | 35/ 76   | N.DEVTAVLAVQTELKEC[<br>160.14]M[147.19]VVK.  | 3 | 2278.692 |
| IPI00022974 | 0.9153 | 16/ 18   | T<br>R.FYTIEILKVE.-                          | 2 | 1254.192 |
| IPI00022974 | 0.9988 | 25/ 28   | T.YLISS IPLQGAFNYK.Y                         | 2 | 1714.992 |
| IPI00022974 | 0.9982 | 24/ 30   | K.TYLISS IPLQGAFNYK.Y                        | 2 | 1816.192 |
| IPI00022974 |        | 1 34/ 60 | K.TYLISS IPLQGAFNYK.Y                        | 3 | 1816.392 |
| IPI00022974 | 0.9896 | 19/ 26   | K.TYLISS IPLQGAFN.Y                          | 2 | 1525.092 |
| IPI00022974 | 0.992  | 32/ 60   | K.TYLISS IPLQGAFNYK.Y                        | 3 | 1817.592 |
| IPI00022974 | 0.9993 | 17/ 30   | K.TYLISS IPLQGAFNYK.Y                        | 2 | 1816.992 |
| IPI00022974 | 0.9998 | 19/ 30   | K.TYLISS IPLQGAFNYK.Y                        | 2 | 1816.192 |
| IPI00022974 | 0.9877 | 21/ 28   | R.ELGIC[160.14]PDDAA<br>VIPIK.N              | 2 | 1612.692 |
| IPI00022974 | 0.9999 | 24/ 30   | K.TYLISS IPLQGAFNYK.Y                        | 2 | 1815.792 |
| IPI00022974 | 0.9989 | 20/ 28   | K.TYLISS IPLQGAFNY.K<br>R.FC[160.14]TGLTQIET | 2 | 1687.992 |
| IPI00022977 | 0.9486 | 15/ 22   | LF.K                                         | 2 | 1429.592 |
| IPI00022977 | 0.914  | 14/ 20   | K.VLTPELYAELR.A<br>R.FC[160.14]TGLTQIET      | 2 | 1303.492 |
| IPI00022977 |        | 1 20/ 24 | LFK.S                                        | 2 | 1558.992 |
| IPI00023020 | 0.956  | 12/ 14   | Q.DLLSHEQK.G                                 | 2 | 969.392  |
| IPI00023020 | 0.9965 | 21/ 48   | R.LPSEFSQFPHGQK.G                            | 3 | 1502.292 |
| IPI00023020 | 0.9226 | 14/ 18   | R.EQDLLSHEQK.G<br>K.VQTSLC[160.14]PAH        | 2 | 1226.792 |
| IPI00023020 | 0.9435 | 12/ 18   | Q.D                                          | 2 | 1140.592 |
| IPI00023020 | 0.9986 | 24/ 48   | R.LPSEFSQFPHGQK.G                            | 3 | 1502.592 |
| IPI00023020 | 0.9876 | 20/ 22   | S.YVLQTEELVANK.Q                             | 2 | 1406.092 |
| IPI00023020 | 0.9964 | 19/ 24   | D.IFSTQDELLVYNK.N<br>K.QGGSQSSYVLQTEELV      | 2 | 1569.392 |
| IPI00023020 | 0.9993 | 35/ 72   | ANK.Q                                        | 3 | 2038.692 |
| IPI00023020 | 0.9912 | 21/ 26   | K.DIFSTQDELLVYNK.N                           | 2 | 1686.092 |
| IPI00023020 | 0.9351 | 24/ 28   | K.DIFSTQDELLVYNKN.Q                          | 2 | 1799.992 |
| IPI00023020 | 0.9951 | 26/ 52   | K.DIFSTQDELLVYNK.N                           | 3 | 1685.992 |
| IPI00023020 | 0.9773 | 15/ 26   | K.DIFSTQDELLVYNK.N                           | 1 | 1685.892 |
| IPI00023020 | 0.9872 | 22/ 26   | K.DIFSTQDELLVYNK.N                           | 2 | 1685.392 |
| IPI00023020 | 0.9938 | 22/ 26   | K.DIFSTQDELLVYNK.N                           | 2 | 1685.592 |
| IPI00023020 | 0.9931 | 21/ 26   | K.DIFSTQDELLVYNK.N                           | 2 | 1685.692 |
| IPI00023020 | 0.9788 | 20/ 24   | K.DIFSTQDELLVYN.K                            | 2 | 1556.892 |

|             |        |        |                      |   |          |
|-------------|--------|--------|----------------------|---|----------|
| IPI00023020 | 0.9698 | 15/ 18 | K.DIFSTQDELL.V       | 2 | 1180.692 |
| IPI00023020 | 0.947  | 16/ 20 | K.DIFSTQDELLV.Y      | 2 | 1279.092 |
| IPI00023020 | 0.9087 | 19/ 22 | K.DIFSTQDELLVY.N     | 2 | 1442.192 |
| IPI00023020 | 0.9137 | 15/ 22 | K.DIFSTQDELLVY.N     | 2 | 1443.592 |
| IPI00023020 | 0.9949 | 19/ 22 | K.DIFSTQDELLVY.N     | 2 | 1443.492 |
| IPI00023020 | 0.9952 | 20/ 22 | K.DIFSTQDELLVY.N     | 2 | 1442.492 |
| IPI00023020 | 0.9645 | 15/ 26 | K.DIFSTQDELLVY.NK.N  | 2 | 1685.592 |
| IPI00023020 | 0.9977 | 18/ 22 | K.DIFSTQDELLVY.N     | 2 | 1443.392 |
| IPI00023020 | 0.9916 | 17/ 26 | K.DIFSTQDELLVY.NK.N  | 2 | 1684.692 |
| IPI00023020 | 0.9934 | 19/ 26 | K.DIFSTQDELLVY.NK.N  | 2 | 1684.692 |
|             |        |        | K.VQTSLC[160.14]PAH  |   |          |
| IPI00023020 | 0.9812 | 13/ 18 | Q.D                  | 2 | 1140.492 |
| IPI00023020 | 0.9976 | 22/ 26 | K.DIFSTQDELLVY.NK.N  | 2 | 1684.892 |
| IPI00023151 | 0.9947 | 18/ 24 | R.LIQVDLNNPIAVR.M    | 2 | 1465.992 |
| IPI00023501 | 0.9362 | 18/ 22 | -.MAPVAVWAALAV.G     | 2 | 1198.892 |
| IPI00023504 | 0.9699 | 18/ 20 | K.IIIGNSSVGK.T       | 2 | 1100.092 |
|             |        |        | R.YADDSFTPAFVSTVGI   |   |          |
| IPI00023504 | 1      | 23/ 36 | DFK.V                | 2 | 2080.292 |
|             |        |        | R.YADDSFTPAFVSTVGI   |   |          |
| IPI00023504 | 1      | 28/ 36 | DFK.V                | 2 | 2080.992 |
| IPI00023673 | 0.9784 | 16/ 24 | R.SDLAVPSELALLK.A    | 2 | 1356.492 |
| IPI00023673 | 0.9738 | 14/ 16 | R.IDITLSSVK.C        | 2 | 976.292  |
|             |        |        |                      |   |          |
| IPI00023673 | 0.9917 | 13/ 26 | R.ELSEALGQIFDSQR.G   | 2 | 1593.292 |
|             |        |        | R.IYTSPTWSAFVTDSSW   |   |          |
| IPI00023673 | 0.9979 | 21/ 34 | SA.R                 | 2 | 2005.792 |
|             |        |        | R.IYTSPTWSAFVTDSSW   |   |          |
| IPI00023673 | 1      | 21/ 32 | S.A                  | 2 | 1935.492 |
|             |        |        | R.IYTSPTWSAFVTDSSW   |   |          |
| IPI00023673 | 0.9988 | 20/ 34 | SA.R                 | 2 | 2006.492 |
| IPI00023673 | 0.9928 | 15/ 18 | R.RIDITLSSVK.C       | 2 | 1130.892 |
| IPI00023673 | 0.9965 | 15/ 16 | R.IDITLSSVK.C        | 2 | 975.092  |
| IPI00023673 | 0.9983 | 20/ 24 | R.SDLAVPSELALLK.A    | 2 | 1355.492 |
| IPI00023673 | 0.9964 | 15/ 16 | R.IDITLSSVK.C        | 2 | 975.692  |
|             |        |        | K.TLQALEFH TVPFQLLA. |   |          |
| IPI00023673 | 0.9028 | 18/ 30 | R                    | 2 | 1828.292 |
| IPI00023673 | 0.9254 | 14/ 18 | R.RIDITLSSVK.C       | 2 | 1132.092 |
| IPI00023673 | 0.9492 | 15/ 16 | R.IDITLSSVK.C        | 2 | 975.892  |
| IPI00023673 | 0.9985 | 18/ 24 | R.SDLAVPSELALLK.A    | 2 | 1356.892 |
|             |        |        | K.TLQALEFH TVPFQLLA. |   |          |
| IPI00023673 | 0.9837 | 19/ 30 | R                    | 2 | 1829.392 |
|             |        |        | R.IYTSPTWSAFVTDSSW   |   |          |
| IPI00023673 | 0.9885 | 17/ 32 | S.A                  | 2 | 1935.992 |
|             |        |        | R.IYTSPTWSAFVTDSSW   |   |          |
| IPI00023673 | 0.9882 | 17/ 34 | SA.R                 | 2 | 2005.992 |
| IPI00023673 | 0.9877 | 14/ 16 | R.IDITLSSVK.C        | 2 | 976.892  |
|             |        |        | K.TLQALEFH TVPFQLLA. |   |          |
| IPI00023673 | 0.9641 | 19/ 30 | R                    | 2 | 1830.792 |
| IPI00023673 | 0.9957 | 15/ 16 | R.IDITLSSVK.C        | 2 | 975.192  |

|             |        |        |                                           |   |          |
|-------------|--------|--------|-------------------------------------------|---|----------|
| IPI00023673 | 0.9964 | 18/ 24 | R.SDLAVPSELALLK.A<br>K.TLQALEFHTVPPFQLLA. | 2 | 1355.992 |
| IPI00023673 | 0.9761 | 18/ 30 | R                                         | 2 | 1829.192 |
| IPI00024175 | 0.9926 | 22/ 52 | R.LYQTDPSGTYHAWK.A<br>K.ALNVEPDGTGLTC[160 | 3 | 1667.992 |
| IPI00024915 | 0.9973 | 26/ 88 | .14]SLAPNIISQL.-<br>R.FSM[147.19]VVQDGI   | 3 | 2384.392 |
| IPI00024915 | 0.9997 | 18/ 20 | VK.A<br>K.ALNVEPDGTGLTC[160               | 2 | 1239.992 |
| IPI00024915 | 0.9992 | 29/ 88 | .14]SLAPNIISQL.-                          | 3 | 2384.092 |
| IPI00024915 | 0.9413 | 13/ 20 | R.LLADPTGAFGK.E                           | 2 | 1090.892 |
| IPI00025318 | 0.9997 | 20/ 24 | R.VYIASSSGSTAIK.K                         | 2 | 1284.792 |
| IPI00025415 | 0.9887 | 12/ 12 | R.HLNC[160.14]GEK.G                       | 2 | 857.692  |
| IPI00025415 | 0.9916 | 18/ 20 | Y.VLQTEELVVNK.Q                           | 2 | 1271.992 |
| IPI00025415 | 0.998  | 17/ 20 | H.LGGSQQLLNYK.Q                           | 2 | 1221.792 |
| IPI00025415 | 0.9983 | 20/ 22 | S.YVLQTEELVVNK.Q                          | 2 | 1435.992 |
| IPI00025415 | 0.9773 | 19/ 24 | D.IFTTQDELLVYNK.N<br>R.TQGGSQSSYVLQTEEL   | 2 | 1583.392 |
| IPI00025415 | 0.9996 | 23/ 76 | VVNK.Q<br>K.DIFTTQDELLVYNKNQ              | 3 | 2167.292 |
| IPI00025415 | 0.9958 | 26/ 76 | HQTK.N<br>R.TQGGSQSSYVLQTEEL              | 3 | 2436.992 |
| IPI00025415 | 0.9952 | 27/ 38 | VVNK.Q                                    | 2 | 2167.992 |
| IPI00025415 | 0.999  | 22/ 26 | K.DIFTTQDELLVYNK.N                        | 2 | 1699.992 |
| IPI00025415 | 0.9997 | 22/ 26 | K.DIFTTQDELLVYNK.N                        | 2 | 1699.392 |
| IPI00025415 | 0.9581 | 23/ 28 | K.DIFTTQDELLVYNKN.Q                       | 2 | 1814.492 |
| IPI00025415 | 0.9684 | 27/ 52 | K.DIFTTQDELLVYNK.N                        | 3 | 1701.092 |
| IPI00025415 | 0.998  | 21/ 26 | K.DIFTTQDELLVYNK.N                        | 2 | 1699.192 |
| IPI00025415 | 0.9998 | 19/ 26 | K.DIFTTQDELLVYNK.N                        | 2 | 1698.692 |
| IPI00025415 | 0.9944 | 18/ 20 | K.DIFTTQDELLV.Y                           | 2 | 1293.592 |
| IPI00025415 | 0.9927 | 16/ 22 | K.DIFTTQDELLVY.N                          | 2 | 1457.792 |
| IPI00025415 | 0.9988 | 17/ 26 | K.DIFTTQDELLVYNK.N                        | 2 | 1698.192 |
| IPI00025415 | 0.9994 | 21/ 26 | K.DIFTTQDELLVYNK.N                        | 2 | 1698.892 |
| IPI00025415 | 0.9905 | 19/ 22 | S.YVLQTEELVVNK.Q<br>R.TQGGSQSSYVLQTEEL    | 2 | 1435.092 |
| IPI00025415 | 0.9992 | 20/ 36 | VVN.K                                     | 2 | 2039.592 |
| IPI00025415 | 0.991  | 19/ 26 | K.DIFTTQDELLVYNK.N                        | 2 | 1698.792 |
| IPI00025415 | 0.9434 | 16/ 20 | K.DIFTTQDELLV.Y                           | 2 | 1293.592 |
| IPI00025426 | 0.9963 | 14/ 16 | K.ATVLNYPK.C                              | 2 | 1018.692 |
| IPI00025426 | 0.9997 | 20/ 24 | R.NQGNTWLTAFLK.T                          | 2 | 1493.092 |
| IPI00025426 | 0.9999 | 20/ 24 | R.NQGNTWLTAFLK.T<br>R.AFQPPFVELTM[147.1   | 2 | 1492.692 |
| IPI00025426 | 0.9998 | 24/ 32 | 9]PYSVIR.G<br>R.AFQPPFVELTM[147.1         | 2 | 2061.792 |
| IPI00025426 | 0.9964 | 28/ 64 | 9]PYSVIR.G                                | 3 | 2061.792 |
| IPI00025427 | 0.9998 | 19/ 22 | R.YPVVPVHLDTTI.-                          | 2 | 1354.992 |

|             |        |        |                                                    |   |          |
|-------------|--------|--------|----------------------------------------------------|---|----------|
| IPI00025427 | 0.9935 | 15/ 22 | R.YPVVPVHLDTTI.-                                   | 2 | 1353.492 |
| IPI00025447 | 0.9998 | 34/ 92 | R.VETGVLKPGM[147.19<br>]VVTFAPVNVTTTEVK.S          | 3 | 2532.092 |
| IPI00025874 | 0.982  | 24/ 56 | R.YDYQRQPDSGISSIR.<br>S                            | 3 | 1786.692 |
| IPI00026197 | 0.9996 | 27/ 34 | G.DIVM[147.19]TQSPD<br>SLAVSLGER.A                 | 2 | 1934.792 |
| IPI00026259 | 0.9926 | 19/ 26 | C.SSPLPLVVNTWPFK.N<br>K.DILLPFQGQLDSIPVSN          | 2 | 1584.892 |
| IPI00026270 | 0.9738 | 36/100 | PSC[160.14]PM[147.19<br>]IPLY.R                    | 3 | 2930.792 |
| IPI00026272 | 0.9928 | 23/ 34 | V.TIAQGGVLPNIQAVLLP<br>K.K                         | 2 | 1832.092 |
| IPI00026272 | 0.9994 | 37/ 72 | R.VTIAQGGVLPNIQAVLL<br>PK.K                        | 3 | 1932.192 |
| IPI00027223 | 1      | 30/ 64 | K.KISGGSVVEM[147.19<br>]QGDEM[147.19]TR.I          | 3 | 1856.192 |
| IPI00027223 | 0.9999 | 20/ 30 | K.ISGGSVVEM[147.19]<br>QGDEM[147.19]TR.I           | 2 | 1727.492 |
| IPI00027230 | 0.9999 | 24/ 36 | R.LISLTDENALSGNEELT<br>VK.I                        | 2 | 2046.192 |
| IPI00027230 | 0.9948 | 21/ 76 | K.ESDDPMAYIHFTAEGE<br>VTFK.S                       | 3 | 2288.592 |
| IPI00027230 | 0.9998 | 33/120 | K.MTEAQEDGQSTSELIG<br>QFGVGFYSAFLVADK.V            | 3 | 3325.692 |
| IPI00027230 | 1      | 24/ 36 | R.LISLTDENALSGNEELT<br>VK.I                        | 2 | 2046.092 |
| IPI00027230 | 0.9998 | 29/120 | K.MTEAQEDGQSTSELIG<br>QFGVGFYSAFLVADK.V            | 3 | 3326.492 |
| IPI00027230 | 0.9433 | 26/ 84 | R.GTTITLVLKEEASDYLE<br>LDTIK.N                     | 3 | 2452.792 |
| IPI00027230 | 0.9994 | 27/ 36 | R.LISLTDENALSGNEELT<br>VK.I                        | 2 | 2046.092 |
| IPI00027230 | 0.976  | 28/ 84 | R.GTTITLVLKEEASDYLE<br>LDTIK.N                     | 3 | 2453.192 |
| IPI00027230 | 1      | 36/144 | K.MTEAQEDGQSTSELIG<br>QFGVGFYSAFLVADK.VIV<br>TSK.H | 3 | 3954.792 |
| IPI00027230 | 0.9572 | 33/ 84 | R.GTTITLVLKEEASDYLE<br>LDTIK.N                     | 3 | 2453.592 |
| IPI00027230 | 0.9999 | 46/120 | K.MTEAQEDGQSTSELIG<br>QFGVGFYSAFLVADK.V            | 3 | 3326.892 |

|             |        |        |                                            |   |          |
|-------------|--------|--------|--------------------------------------------|---|----------|
| IPI00027230 | 0.9999 | 23/ 30 | A.DDEVVDVDGTVEEDLG<br>K.S                  | 2 | 1734.692 |
| IPI00027230 | 0.9997 | 25/ 36 | R.LISLTDENALSGNEELT<br>VK.I                | 2 | 2046.092 |
| IPI00027230 | 0.9997 | 18/ 36 | R.LISLTDENALSGNEELT<br>VK.I                | 2 | 2046.792 |
| IPI00027230 | 0.9982 | 29/ 84 | R.GTTITLVLKEEASDYLE<br>LDTIK.N             | 3 | 2454.592 |
| IPI00027230 | 0.9341 | 28/ 84 | R.GTTITLVLKEEASDYLE<br>LDTIK.N             | 3 | 2452.592 |
| IPI00027230 | 0.9999 | 35/ 80 | R.LTESPC[160.14]ALVA<br>SQYGWSGNMER.I      | 3 | 2357.892 |
| IPI00027230 | 1      | 34/ 80 | R.LTESPC[160.14]ALVA<br>SQYGWSGNMER.I      | 3 | 2357.892 |
| IPI00027255 | 0.9997 | 16/ 24 | R.ALGQNPTNAEVLK.V<br>K.EGGLGPLNIPLLADVT.   | 2 | 1354.292 |
| IPI00027350 | 0.9278 | 21/ 30 | R<br>R.SDPVTLNVLYGPDVPTI                   | 2 | 1578.592 |
| IPI00027412 | 0.9972 | 26/ 40 | SPSK.A<br>R.VDGNSLIVGYVIGTQQ               | 2 | 2199.892 |
| IPI00027412 | 0.9972 | 45/100 | ATPGPAYSGR.E<br>R.SDPVTLNVLYGPDVPTI        | 3 | 2621.992 |
| IPI00027412 | 0.9958 | 26/ 40 | SPSK.A<br>R.SDPVTLNVLYGPDVPTI              | 2 | 2199.892 |
| IPI00027412 | 0.993  | 29/ 80 | SPSK.A                                     | 3 | 2200.292 |
| IPI00027444 | 0.994  | 17/ 20 | R.LGVQDLFNSSK.A                            | 2 | 1207.692 |
| IPI00027444 | 0.9985 | 16/ 18 | K.FAYGYIEDLK.C                             | 2 | 1217.992 |
| IPI00027444 | 0.9912 | 20/ 26 | K.TYNFLPEFLVSTQK.T                         | 2 | 1686.992 |
| IPI00027444 | 0.9916 | 17/ 20 | R.LGVQDLFNSSK.A<br>K.VIEHIM[147.19]EDLD    | 2 | 1207.892 |
| IPI00027462 | 0.9989 | 18/ 28 | TNADK.Q                                    | 2 | 1760.692 |
| IPI00027462 | 0.9949 | 20/ 28 | R.NIETIINTFHQYSVK.L                        | 2 | 1806.892 |
| IPI00027462 | 0.9962 | 19/ 28 | R.NIETIINTFHQYSVK.L                        | 2 | 1806.392 |
| IPI00027462 | 0.9943 | 17/ 28 | R.NIETIINTFHQYSVK.L                        | 2 | 1809.492 |
| IPI00027462 | 0.9948 | 11/ 14 | R.LTWASHEK.M                               | 2 | 970.892  |
| IPI00027462 | 0.966  | 19/ 32 | R.KDLQNFLKK.E                              | 3 | 1134.592 |
| IPI00027462 | 0.9997 | 19/ 28 | R.NIETIINTFHQYSVK.L<br>K.QLSFEFIM[147.19]L | 2 | 1807.092 |
| IPI00027462 | 0.9985 | 20/ 24 | M[147.19]AR.L                              | 2 | 1646.492 |
| IPI00027462 | 0.9983 | 16/ 24 | I.ETIINTFHQYSVK.L                          | 2 | 1580.892 |
| IPI00027462 | 0.9973 | 20/ 28 | R.NIETIINTFHQYSVK.L                        | 2 | 1807.692 |
| IPI00027462 | 0.997  | 20/ 28 | R.NIETIINTFHQYSVK.L                        | 2 | 1806.792 |



|             |        |          |                                                      |   |          |
|-------------|--------|----------|------------------------------------------------------|---|----------|
| IPI00027462 | 0.9932 | 19/ 28   | R.NIETIINTFHQYSVK.L                                  | 2 | 1808.792 |
| IPI00027462 | 0.9985 | 19/ 28   | R.NIETIINTFHQYSVK.L                                  | 2 | 1806.992 |
| IPI00027497 | 0.9972 | 23/ 32   | K.TLAQLNPESLFIASK.<br>T                              | 2 | 1831.792 |
| IPI00027509 |        | 1 22/ 28 | K.LGLGADVAQVTGALR.<br>S                              | 2 | 1440.992 |
| IPI00027806 | 0.9847 | 14/ 20   | K.AVYLVLC[160.14]NYSP<br>K.G                         | 2 | 1313.692 |
| IPI00027806 | 0.9991 | 15/ 20   | K.AVYLVLC[160.14]NYSP<br>K.G                         | 2 | 1313.092 |
| IPI00027827 | 0.9184 | 13/ 14   | R.VTGVVLFQ.<br>K.YQGLC[160.14]PPVP                   | 2 | 890.892  |
| IPI00028147 | 0.9994 | 15/ 18   | R.T<br>K.GVILYSDPADYFAPGV                            | 2 | 1186.292 |
| IPI00028514 | 0.9998 | 20/ 32   | K.S<br>K.GVILYSDPADYFAPGV                            | 2 | 1811.692 |
| IPI00028514 | 0.9999 | 22/ 32   | K.S<br>K.ALSM[147.19]C[160.<br>14]PPSPLGC[160.14]EL  | 2 | 1811.792 |
| IPI00029236 | 0.9986 | 20/ 30   | VK.E<br>K.ALSM[147.19]C[160.<br>14]PPSPLGC[160.14]EL | 2 | 1776.392 |
| IPI00029236 | 0.9987 | 17/ 30   | VK.E<br>K.ITGTM[147.19]PPLPL                         | 2 | 1774.792 |
| IPI00029260 | 0.9959 | 19/ 38   | EATGLALSSL.R<br>R.SVPSDIFQIQATTIYAN                  | 2 | 1997.892 |
| IPI00029658 | 0.9998 | 28/ 88   | TINTFR.I<br>K.SIDVAC[160.14]HPG                      | 3 | 2600.892 |
| IPI00029739 | 0.9964 | 17/ 26   | YALPK.A<br>I.DVAC[160.14]HPGYAL                      | 2 | 1526.592 |
| IPI00029739 | 0.9806 | 17/ 22   | PK.A<br>R.DDM[147.19]TVC[16<br>0.14]VADFGLSKK.I      | 2 | 1327.892 |
| IPI00029756 | 0.9673 | 16/ 28   | K.KEPNLFS[167.08]HD<br>AVVR.E                        | 2 | 1702.292 |
| IPI00029773 | 0.9576 | 16/ 24   | R.LC[160.14]QDLGPGA<br>FR.L                          | 2 | 1593.592 |
| IPI00029863 | 0.9978 | 18/ 20   | R.LC[160.14]QDLGPGA<br>FR.L                          | 2 | 1233.492 |
| IPI00029863 | 0.9452 | 16/ 20   | FR.L<br>G.EIVLTQSPGTLSLSPGE                          | 2 | 1232.992 |
| IPI00030205 | 0.9546 | 25/ 34   | R.A<br>R.FSGSGSGTDFTLTISR.                           | 2 | 1884.792 |
| IPI00030205 | 0.9999 | 23/ 30   | L<br>R.FSGSGSGTDFTLTISR.                             | 2 | 1632.692 |
| IPI00030205 | 0.9997 | 21/ 30   | L<br>R.FSGSGSGTDFTLTISR.                             | 2 | 1633.992 |
| IPI00030205 |        | 1 22/ 30 | L<br>L                                               | 2 | 1632.592 |

|             |        |        |                                              |   |          |
|-------------|--------|--------|----------------------------------------------|---|----------|
| IPI00031121 | 0.9946 | 15/ 18 | R.SNAQGIDLNR.N                               | 2 | 1087.992 |
| IPI00031169 | 0.9748 | 17/ 20 | K.YIIIGDTGVGK.S                              | 2 | 1135.492 |
| IPI00031461 | 0.979  | 13/ 20 | K.FVSISDLLVPK.D                              | 2 | 1217.792 |
| IPI00031523 | 0.974  | 17/ 22 | K.ADLINNLGTIAK.S                             | 2 | 1242.492 |
| IPI00032179 | 0.9179 | 14/ 20 | R.DIPM[147.19]NPM[147.19]C[160.14]IYR.S      | 2 | 1441.492 |
| IPI00032220 | 0.9975 | 20/ 28 | P.FVQGLALYTPVVLPR.S                          | 2 | 1673.292 |
| IPI00032220 | 0.995  | 20/ 30 | K.VLSALQAVQGLLVAQG.R                         | 2 | 1568.292 |
| IPI00032258 | 0.9595 | 17/ 30 | R.LLATLC[160.14]SAEVC[160.14]QC[160.14]AEG.K | 2 | 1781.692 |
| IPI00032258 | 0.9746 | 19/ 36 | R.EC[160.14]VGFEAVQEVVGLVQPA.S               | 2 | 2029.092 |
| IPI00032258 | 0.9984 | 27/ 38 | K.VGLSGM[147.19]AIA DVTLLSGFHAL.R            | 2 | 1988.392 |
| IPI00032258 | 0.9933 | 13/ 16 | K.AEFQDALEK.L                                | 2 | 1050.092 |
| IPI00032258 | 0.9995 | 16/ 18 | R.VGDTLNLNLR.A                               | 2 | 1115.592 |
| IPI00032258 | 0.9989 | 19/ 22 | K.LNM[147.19]GITDLQGLR.L                     | 2 | 1347.292 |
| IPI00032258 | 0.9999 | 26/ 52 | R.YIYGKPVQGVAYVR.F                           | 3 | 1613.992 |
| IPI00032258 | 0.939  | 14/ 20 | K.GLC[160.14]VATPVQLR.V                      | 2 | 1213.592 |
| IPI00032258 | 0.9186 | 22/ 36 | K.KYVLPNFEVK.I                               | 3 | 1237.392 |
| IPI00032258 | 0.999  | 17/ 24 | R.GSFEFPVGDAVSK.V                            | 2 | 1339.792 |
| IPI00032258 | 0.9941 | 25/ 52 | R.GPEVQLVAHSPWLK.D                           | 3 | 1561.792 |
| IPI00032258 | 1      | 36/100 | K.LHLETDSLALVALGALD TALAAGSK.S               | 3 | 2614.892 |
| IPI00032258 | 0.9989 | 45/100 | R.LLLFSPSVVHLGVPLSVGVQLQDVPR.G               | 3 | 2770.892 |
| IPI00032258 | 0.9836 | 28/ 52 | R.YIYGKPVQGVAYVR.F                           | 3 | 1615.392 |
| IPI00032258 | 0.9998 | 17/ 24 | R.GSFEFPVGDAVSK.V                            | 2 | 1339.992 |
| IPI00032258 | 0.9732 | 17/ 22 | R.YIYGKPVQGVAY.V                             | 2 | 1358.492 |
| IPI00032258 | 0.99   | 15/ 20 | K.GLC[160.14]VATPVQLR.V                      | 2 | 1213.592 |
| IPI00032258 | 0.9971 | 17/ 24 | R.GSFEFPVGDAVSK.V                            | 2 | 1339.092 |
| IPI00032258 | 0.9969 | 24/ 52 | R.GPEVQLVAHSPWLK.D                           | 3 | 1561.192 |
| IPI00032258 | 0.998  | 19/ 24 | R.TTNIQGINLLFSS.R                            | 2 | 1408.892 |
| IPI00032258 | 0.9588 | 15/ 22 | R.TTNIQGINLLFS.S                             | 2 | 1320.192 |
| IPI00032258 | 0.9999 | 20/ 22 | R.DFALLSLQVPLK.D                             | 2 | 1343.492 |
| IPI00032258 | 0.9776 | 19/ 26 | R.HLVPGAPFLLQALV.R                           | 2 | 1475.292 |

|             |        |        |                                          |   |          |
|-------------|--------|--------|------------------------------------------|---|----------|
| IPI00032258 | 0.9998 | 36/100 | K.LHLETDSLALVALGALD<br>TALYAAGSK.S       | 3 | 2613.992 |
| IPI00032258 | 0.9993 | 21/ 28 | K.VLSLAQEQVGG SPEK.<br>L                 | 2 | 1542.192 |
| IPI00032258 | 1      | 22/ 28 | K.VLSLAQEQVGG SPEK.<br>L                 | 2 | 1541.592 |
| IPI00032258 | 0.9998 | 35/ 96 | R.VTASDPLDTLGSEGAL<br>SPGGVASLL.R        | 3 | 2327.892 |
| IPI00032258 | 0.9999 | 26/ 48 | R.VTASDPLDTLGSEGAL<br>SPGGVASLL.R        | 2 | 2327.892 |
| IPI00032258 | 0.9857 | 25/ 64 | R.PVAFSVVPTAAAAVSL<br>K.V                | 3 | 1628.392 |
| IPI00032258 | 0.9997 | 27/ 32 | R.PVAFSVVPTAAAAVSL<br>K.V                | 2 | 1628.292 |
| IPI00032258 | 0.9995 | 31/ 64 | R.PVAFSVVPTAAAAVSL<br>K.V                | 3 | 1628.192 |
| IPI00032258 | 0.987  | 25/ 32 | R.PVAFSVVPTAAAAVSL<br>K.V                | 2 | 1628.292 |
| IPI00032258 | 0.9995 | 32/ 64 | R.PVAFSVVPTAAAAVSL<br>K.V                | 3 | 1628.992 |
| IPI00032258 | 0.9981 | 26/ 32 | R.PVAFSVVPTAAAAVSL<br>K.V                | 2 | 1627.892 |
| IPI00032258 | 0.9408 | 18/ 22 | R.DSSTWLTAFLK.V                          | 2 | 1367.592 |
| IPI00032292 | 0.9895 | 12/ 16 | R.SEEFLIAGK.L                            | 2 | 992.892  |
| IPI00032293 | 0.9963 | 23/ 56 | Q.PNLDNC[160.14]PFH<br>DQPHLK.R          | 3 | 1833.492 |
| IPI00032293 | 1      | 15/ 20 | R.ALDFAVGEYNK.A                          | 2 | 1226.192 |
| IPI00032325 | 0.9705 | 19/ 22 | K.TQVVAGTNYIYK.V                         | 2 | 1355.892 |
| IPI00032325 | 0.9944 | 19/ 22 | K.TQVVAGTNYIYK.V                         | 2 | 1356.592 |
| IPI00032325 | 0.9979 | 27/ 52 | K.TNETYGKLEAVQYK.T                       | 3 | 1644.592 |
| IPI00032325 | 0.9664 | 19/ 22 | K.TQVVAGTNYIYK.V                         | 2 | 1355.892 |
| IPI00032325 | 1      | 19/ 22 | K.TQVVAGTNYIYK.V                         | 2 | 1357.592 |
| IPI00032328 | 0.9964 | 14/ 20 | K.ENFLFLTPDC[160.14]<br>K.S              | 2 | 1386.092 |
| IPI00032328 | 0.9982 | 22/ 34 | R.DIPTNSPELEETLHTIT<br>.K                | 2 | 2012.092 |
| IPI00032328 | 0.9965 | 16/ 20 | K.ENFLFLTPDC[160.14]<br>K.S              | 2 | 1383.592 |
| IPI00032328 | 0.9535 | 18/ 26 | R.IASFSQNC[160.14]DI<br>YPGK.D           | 2 | 1600.692 |
| IPI00032328 | 0.9961 | 16/ 30 | K.KIYPTVNC[160.14]QP<br>LGM[147.19]ISL.M | 2 | 1849.792 |
| IPI00032328 | 0.992  | 21/ 34 | R.DIPTNSPELEETLHTIT<br>.K                | 2 | 2010.692 |
| IPI00032328 | 0.9987 | 17/ 20 | K.ENFLFLTPDC[160.14]<br>K.S              | 2 | 1383.092 |
| IPI00032633 | 0.9008 | 13/ 20 | K.KILLLEAGPKK.V                          | 2 | 1210.392 |

|             |        |        |                      |   |          |
|-------------|--------|--------|----------------------|---|----------|
| IPI00032808 | 0.9981 | 16/ 22 | R.DAADQNFDYM[147.1   | 2 | 1480.692 |
| IPI00032808 | 0.9455 | 18/ 20 | 9]FK.L               | 2 | 1100.692 |
| IPI00032808 | 0.9995 | 18/ 22 | K.LLLIGNSSVGK.T      | 2 | 1480.392 |
| IPI00033583 | 0.9999 | 18/ 30 | R.DAADQNFDYM[147.1   | 2 | 1675.792 |
| IPI00037448 | 0.9848 | 26/ 92 | 9]FK.L               | 3 | 2468.992 |
| IPI00045547 | 0.9458 | 17/ 24 | R.ADLTGISPSPNLYLSK.I | 2 | 1219.292 |
| IPI00045547 | 0.9949 | 15/ 24 | K.IAAAGLDVTSPEPLPTN  | 2 | 1219.292 |
| IPI00060800 | 0.9982 | 14/ 16 | HPLTLK.N             | 2 | 926.992  |
| IPI00061200 | 0.9386 | 19/ 22 | R.SGTSASLAISGLR.S    | 2 | 1479.692 |
| IPI00061977 | 0.9922 | 14/ 18 | K.SGTSASLAISGLR.S    | 2 | 1212.592 |
| IPI00061977 | 0.9952 | 38/120 | R.VSVGLLLVK.S        | 3 | 3419.492 |
| IPI00061977 | 0.9935 | 17/ 18 | R.FLEQQNQVLETK.W     | 2 | 1212.892 |
| IPI00061977 | 0.9983 | 16/ 18 | R.WLQGSQELPR.E       | 2 | 1213.092 |
| IPI00061977 | 0.9987 | 39/ 84 | R.WLQGSQELPR.E       | 3 | 2451.592 |
| IPI00061977 | 1      | 41/120 | K.SGNTFRPEVHLLPPPSE  | 3 | 3419.392 |
| IPI00061977 | 0.9997 | 17/ 18 | ELALNELVTLTC[160.14] | 2 | 1214.292 |
| IPI00061977 | 0.9985 | 19/ 32 | LA.R                 | 2 | 1835.592 |
| IPI00061977 | 0.9979 | 19/ 32 | R.WLQGSQELPR.E       | 2 | 1835.892 |
| IPI00061977 | 1      | 22/ 32 | R.WLQGSQELPR.E       | 2 | 1836.392 |
| IPI00061977 | 0.9929 | 26/ 64 | H.LLPPPSEELALNELVTLT | 3 | 1835.692 |
| IPI00061977 | 0.9889 | 20/ 32 | C[160.14]LAR.G       | 2 | 1836.292 |
| IPI00061977 | 0.9998 | 22/ 32 | K.SGNTFRPEVHLLPPPSE  | 2 | 1835.692 |
| IPI00061977 | 0.992  | 24/ 64 | ELALNELVTLTC[160.14] | 3 | 1838.692 |
| IPI00061977 | 0.9993 | 24/ 64 | LA.R                 | 3 | 1836.892 |
| IPI00061977 | 1      | 22/ 32 | R.WLQGSQELPR.E       | 2 | 1836.292 |
| IPI00061977 | 0.9998 | 19/ 28 | R.QEPSQGTTTTFAVTSILR | 2 | 1540.692 |
| IPI00061977 | 0.9998 | 22/ 28 | .V                   | 2 | 1539.992 |
|             |        |        | R.DASGVTFTWTPSSGK.   |   |          |
|             |        |        | S                    |   |          |
|             |        |        | R.DASGVTFTWTPSSGK.   |   |          |
|             |        |        | S                    |   |          |

|             |        |        |                                                                      |   |          |
|-------------|--------|--------|----------------------------------------------------------------------|---|----------|
| IPI00061977 | 0.9997 | 37/116 | R.NFPPSQDASGDLYTTS<br>SQLTLPATQC[160.14]L<br>AGK.S                   | 3 | 3169.292 |
| IPI00061977 | 0.9997 | 32/116 | R.NFPPSQDASGDLYTTS<br>SQLTLPATQC[160.14]L<br>AGK.S                   | 3 | 3169.592 |
| IPI00061977 | 0.9982 | 39/116 | R.NFPPSQDASGDLYTTS<br>SQLTLPATQC[160.14]L<br>AGK.S                   | 3 | 3169.492 |
| IPI00061977 | 1      | 21/ 58 | R.NFPPSQDASGDLYTTS<br>SQLTLPATQC[160.14]L<br>AGK.S                   | 2 | 3169.392 |
| IPI00061977 | 0.9653 | 43/116 | R.NFPPSQDASGDLYTTS<br>SQLTLPATQC[160.14]L<br>AGK.S                   | 3 | 3171.092 |
| IPI00061977 | 0.9999 | 38/116 | R.NFPPSQDASGDLYTTS<br>SQLTLPATQC[160.14]L<br>AGK.S                   | 3 | 3170.892 |
| IPI00061977 | 0.9999 | 21/ 28 | R.DASGVTFTWTPSSGK.<br>S<br>R.NFPPSQDASGDLYTTS<br>SQLTLPATQC[160.14]L | 2 | 1541.592 |
| IPI00061977 | 0.9998 | 38/116 | R.NFPPSQDASGDLYTTS<br>SQLTLPATQC[160.14]L<br>AGK.S                   | 3 | 3169.792 |
| IPI00061977 | 1      | 22/ 58 | R.NFPPSQDASGDLYTTS<br>SQLTLPATQC[160.14]L<br>AGK.S                   | 2 | 3169.092 |
| IPI00061977 | 0.9667 | 39/116 | R.NFPPSQDASGDLYTTS<br>SQLTLPATQC[160.14]L<br>AGK.S                   | 3 | 3169.792 |
| IPI00061977 | 1      | 20/ 58 | R.NFPPSQDASGDLYTTS<br>SQLTLPATQC[160.14]L<br>AGK.S                   | 2 | 3169.392 |
| IPI00061977 | 0.9997 | 39/116 | R.NFPPSQDASGDLYTTS<br>SQLTLPATQC[160.14]L<br>AGK.S                   | 3 | 3170.092 |
| IPI00061977 | 0.9996 | 23/ 28 | R.DASGVTFTWTPSSGK.<br>S<br>R.NFPPSQDASGDLYTTS<br>SQLTLPATQC[160.14]L | 2 | 1540.092 |
| IPI00061977 | 1      | 35/116 | R.NFPPSQDASGDLYTTS<br>SQLTLPATQC[160.14]L<br>AGK.S                   | 3 | 3170.492 |
| IPI00061977 | 0.9996 | 36/116 | R.NFPPSQDASGDLYTTS<br>SQLTLPATQC[160.14]L<br>AGK.S                   | 3 | 3169.292 |
| IPI00061977 | 0.9864 | 37/116 | R.NFPPSQDASGDLYTTS<br>SQLTLPATQC[160.14]L<br>AGK.S                   | 3 | 3170.092 |
| IPI00061977 | 0.9996 | 22/ 28 | K.GTTVTVSSASPTSPK.V                                                  | 2 | 1419.192 |

|             |        |        |                                      |   |          |
|-------------|--------|--------|--------------------------------------|---|----------|
| IPI00073772 | 0.9999 | 15/ 32 | R.GTGELTQLLNSLC[160<br>.14]TAVK.A    | 2 | 1804.692 |
| IPI00099615 | 0.9275 | 11/ 18 | R.VEYTMYPGK.D                        | 2 | 1216.192 |
| IPI00100453 | 0.9697 | 12/ 14 | R.EPLYVSWR.N                         | 2 | 1049.692 |
| IPI00154742 | 0.9993 | 23/ 28 | K.YAASSYLSLTPEQWK.S                  | 2 | 1743.792 |
| IPI00154742 | 0.9457 | 24/ 28 | K.YAASSYLSLTPEQWK.S                  | 2 | 1744.792 |
| IPI00154742 | 0.968  | 24/ 56 | K.YAASSYLSLTPEQWK.S                  | 3 | 1745.092 |
| IPI00154742 | 0.9994 | 24/ 28 | K.YAASSYLSLTPEQWK.S                  | 2 | 1743.692 |
| IPI00154742 | 0.99   | 25/ 56 | K.YAASSYLSLTPEQWK.S                  | 3 | 1744.892 |
| IPI00154742 | 0.9996 | 20/ 28 | K.YAASSYLSLTPEQWK.S                  | 2 | 1743.592 |
| IPI00154742 | 0.9996 | 24/ 28 | K.YAASSYLSLTPEQWK.S                  | 2 | 1744.592 |
| IPI00154742 | 0.9587 | 23/ 28 | K.YAASSYLSLTPEQWK.S                  | 2 | 1745.192 |
| IPI00154742 | 0.9992 | 28/ 38 | K.ATLVC[160.14]LISDF<br>YPGAVTVAWK.A | 2 | 2211.692 |
| IPI00154742 | 0.9998 | 28/ 38 | K.ATLVC[160.14]LISDF<br>YPGAVTVAWK.A | 2 | 2211.092 |
| IPI00154742 | 0.9997 | 38/ 76 | K.ATLVC[160.14]LISDF<br>YPGAVTVAWK.A | 3 | 2212.292 |
| IPI00154742 | 0.9994 | 24/ 36 | K.AAPSVTLFPPSSEELQA<br>NK.A          | 2 | 1986.692 |
| IPI00164623 | 0.9912 | 20/ 40 | R.KVLLDGVQNP.R.A                     | 3 | 1239.192 |
| IPI00164623 | 0.9896 | 17/ 18 | K.VLLDGVQNP.R.A                      | 2 | 1110.392 |
| IPI00164623 | 0.9987 | 15/ 16 | K.TGLQEVEVK.A                        | 2 | 1002.192 |
| IPI00164623 | 0.9968 | 22/ 26 | R.IPIEDGSGEVVLSR.K                   | 2 | 1470.392 |
| IPI00164623 | 0.9996 | 13/ 16 | R.YTYLIM[147.19]NK.<br>G             | 2 | 1223.592 |
| IPI00164623 | 0.9973 | 22/ 28 | R.TVM[147.19]VNIENP<br>EGIPVK.Q      | 2 | 1655.292 |
| IPI00164623 | 0.9999 | 27/ 42 | R.VPVAVQGEDTVQSLTQ<br>GDGVAK.L       | 2 | 2197.092 |
| IPI00164623 | 0.9989 | 33/ 84 | R.VPVAVQGEDTVQSLTQ<br>GDGVAK.L       | 3 | 2198.792 |
| IPI00164623 | 0.9153 | 24/ 52 | R.LVAYYTLIGASGQR.E                   | 3 | 1511.992 |
| IPI00164623 | 0.9919 | 21/ 26 | R.LVAYYTLIGASGQR.E                   | 2 | 1510.692 |
| IPI00164623 | 0.9808 | 18/ 24 | K.SSLSVPYVIVPLK.T                    | 2 | 1401.492 |
| IPI00164623 | 0.9992 | 18/ 24 | K.SSLSVPYVIVPLK.T                    | 2 | 1400.992 |
| IPI00164623 | 0.9988 | 22/ 26 | R.IPIEDGSGEVVLSR.K                   | 2 | 1470.192 |

|             |        |        |                                              |   |          |
|-------------|--------|--------|----------------------------------------------|---|----------|
| IPI00164623 | 0.9928 | 12/ 14 | K.FYYIYNEK.G                                 | 2 | 1139.492 |
| IPI00164623 | 0.9991 | 18/ 22 | K.TIYTPGSTVLRY.I                             | 2 | 1371.392 |
| IPI00164623 | 0.999  | 22/ 28 | R.TVM[147.19]VNIENP<br>EGIPVK.Q              | 2 | 1655.492 |
| IPI00164623 | 0.9998 | 32/ 60 | R.VELLHNPAFC[160.14]<br>SLATTK.R             | 3 | 1801.892 |
| IPI00164623 | 0.9999 | 23/ 30 | R.SGIPIVTSPYQIHFTK.T<br>R.VELLHNPAFC[160.14] | 2 | 1788.992 |
| IPI00164623 | 0.9979 | 18/ 28 | SLATT.K                                      | 2 | 1673.492 |
| IPI00164623 | 0.9998 | 29/ 48 | I.PIVTSPYQIHFTK.T                            | 3 | 1531.692 |
| IPI00164623 | 0.9987 | 21/ 30 | K.EYVLPSEFVIVEPTEK.F<br>R.YYTYLIM[147.19]NK. | 2 | 1879.492 |
| IPI00164623 | 0.9995 | 14/ 16 | G                                            | 2 | 1223.892 |
| IPI00164623 | 0.9979 | 12/ 14 | K.FYYIYNEK.G                                 | 2 | 1139.392 |
| IPI00164623 | 0.9876 | 20/ 28 | R.TVM[147.19]VNIENP<br>EGIPVK.Q              | 2 | 1656.892 |
| IPI00164623 | 0.9976 | 23/ 30 | R.VELLHNPAFC[160.14]<br>SLATTK.R             | 2 | 1801.092 |
| IPI00164623 | 0.9999 | 27/ 68 | K.VRVELLHNPAFC[160.<br>14]SLATTK.R           | 3 | 2056.492 |
| IPI00164623 | 0.9992 | 22/ 26 | R.LVAYYTLIGASGQR.E                           | 2 | 1511.692 |
| IPI00164623 | 0.9995 | 29/ 48 | I.PIVTSPYQIHFTK.T                            | 3 | 1532.092 |
| IPI00164623 | 0.9978 | 22/ 30 | K.EYVLPSEFVIVEPTEK.F                         | 2 | 1880.992 |
| IPI00164623 | 0.9989 | 18/ 22 | K.TIYTPGSTVLRY.I                             | 2 | 1370.492 |
| IPI00164623 | 0.9855 | 33/ 60 | R.VELLHNPAFC[160.14]<br>SLATTK.R             | 3 | 1801.392 |
| IPI00164623 | 0.9793 | 17/ 26 | R.LVAYYTLIGASGQR.E                           | 2 | 1511.592 |
| IPI00164623 | 0.9983 | 28/ 48 | I.PIVTSPYQIHFTK.T                            | 3 | 1532.392 |
| IPI00164623 | 0.9975 | 17/ 24 | K.SSLVPPVIVPLK.T                             | 2 | 1402.992 |
| IPI00164623 | 0.9948 | 21/ 28 | R.SGIPIVTSPYQIHFT.K                          | 2 | 1659.792 |
| IPI00164623 | 0.9174 | 19/ 26 | R.SGIPIVTSPYQIHFT                            | 2 | 1559.592 |
| IPI00164623 | 0.9999 | 22/ 30 | K.EYVLPSEFVIVEPTEK.F<br>K.VHQYFNVELIQPGAVK   | 2 | 1879.892 |
| IPI00164623 | 0.9722 | 22/ 60 | .V                                           | 3 | 1842.292 |
| IPI00164623 | 0.9862 | 25/ 36 | K.VQLSNDFDEYIM[147.<br>19]AIEQTIK.S          | 2 | 2273.092 |
| IPI00164623 | 0.999  | 31/ 72 | K.VQLSNDFDEYIM[147.<br>19]AIEQTIK.S          | 3 | 2273.592 |
| IPI00164623 | 0.9974 | 15/ 18 | K.DFDVPPVVR.W                                | 2 | 1190.392 |
| IPI00165579 | 0.9756 | 26/ 76 | K.NVM[147.19]LLPVGS<br>ADDGAHSQNEK.L         | 3 | 2098.392 |
| IPI00166729 | 0.9898 | 16/ 18 | R.AGEVQPELR.G                                | 2 | 1127.092 |

|             |        |        |                                           |   |          |
|-------------|--------|--------|-------------------------------------------|---|----------|
| IPI00166729 | 0.9993 | 20/ 22 | R.YSLTYIYTGLSK.H<br>D.PPSVVVTSHQAPGEK.    | 2 | 1408.292 |
| IPI00166729 | 0.9883 | 26/ 56 | K                                         | 3 | 1532.892 |
| IPI00166729 | 0.9849 | 15/ 18 | R.AGEVQEPRLR.G<br>K.AYLEEEEC[160.14]PAT   | 2 | 1127.092 |
| IPI00166729 | 0.9959 | 14/ 22 | LR.K                                      | 2 | 1451.092 |
| IPI00166729 | 0.9983 | 21/ 48 | K.YYYDGKDYIEFNK.E<br>K.C[160.14]LAYDFYPGK | 3 | 1719.192 |
| IPI00166729 | 0.998  | 15/ 18 | .I<br>K.C[160.14]LAYDFYPGK                | 2 | 1235.092 |
| IPI00166729 | 0.9985 | 15/ 18 | .I                                        | 2 | 1234.292 |
| IPI00166729 | 0.987  | 16/ 26 | I.PAWVPFDPAAQITK.Q<br>K.HVEDVPAFQALGSLND  | 2 | 1541.392 |
| IPI00166729 | 0.9932 | 29/ 80 | LQFFR.Y<br>K.C[160.14]LAYDFYPGK           | 3 | 2403.992 |
| IPI00166729 | 0.9999 | 15/ 18 | .I                                        | 2 | 1234.692 |
| IPI00166729 | 0.9958 | 20/ 48 | K.YYYDGKDYIEFNK.E<br>K.EIPAWVPFDPAAQITK.  | 3 | 1719.392 |
| IPI00166729 | 0.9995 | 21/ 30 | Q                                         | 2 | 1785.792 |
| IPI00166729 | 1      | 25/ 52 | R.AKAYLEEEEC[160.14]P<br>ATLR.K           | 3 | 1651.592 |
| IPI00166729 | 0.9415 | 17/ 22 | K.AYLEEEEC[160.14]PAT<br>LR.K             | 2 | 1454.092 |
| IPI00166729 | 0.9996 | 18/ 22 | K.AYLEEEEC[160.14]PAT<br>LR.K             | 2 | 1450.792 |
| IPI00166729 | 0.9975 | 14/ 18 | K.C[160.14]LAYDFYPGK<br>.I                | 2 | 1233.692 |
| IPI00166729 | 0.9977 | 19/ 22 | R.YSLTYIYTGLSK.H<br>K.EIPAWVPFDPAAQITK.   | 2 | 1408.692 |
| IPI00166729 | 0.9995 | 22/ 30 | Q<br>K.AYLEEEEC[160.14]PAT                | 2 | 1784.192 |
| IPI00166729 | 0.9998 | 18/ 22 | LR.K<br>K.C[160.14]LAYDFYPGK              | 2 | 1451.492 |
| IPI00166729 | 0.9965 | 15/ 18 | .I                                        | 2 | 1233.192 |
| IPI00166729 | 0.9991 | 19/ 22 | R.YSLTYIYTGLSK.H<br>K.EIPAWVPFDPAAQITK.   | 2 | 1410.092 |
| IPI00166729 | 0.9997 | 21/ 30 | Q<br>K.AYLEEEEC[160.14]PAT                | 2 | 1782.392 |
| IPI00166729 | 0.9403 | 20/ 24 | LRK.Y                                     | 2 | 1579.692 |
| IPI00166729 | 0.9728 | 24/ 44 | K.QKWEAEPVYVQR.A<br>R.AKAYLEEEEC[160.14]P | 3 | 1534.492 |
| IPI00166729 | 0.9538 | 22/ 52 | ATLR.K<br>K.AYLEEEEC[160.14]PAT           | 3 | 1653.092 |
| IPI00166729 | 0.9991 | 19/ 22 | LR.K                                      | 2 | 1451.692 |
| IPI00166729 | 0.9997 | 15/ 18 | K.WEAEPVYVQR.A<br>K.NILDRQDPPSVVVTSH      | 2 | 1275.992 |
| IPI00166729 | 0.9951 | 40/ 84 | QAPGEK.K                                  | 3 | 2387.092 |
| IPI00166729 | 1      | 21/ 48 | K.YYYDGKDYIEFNK.E                         | 3 | 1719.292 |



|             |        |        |                                             |   |          |
|-------------|--------|--------|---------------------------------------------|---|----------|
| IPI00166729 | 0.9995 | 15/ 18 | K.C[160.14]LAYDFYPGK<br>.I                  | 2 | 1235.292 |
| IPI00166729 | 0.989  | 13/ 18 | K.C[160.14]LAYDFYPGK<br>.I                  | 1 | 1232.592 |
| IPI00166729 | 0.9999 | 18/ 22 | R.YSLTYIYTGLSK.H                            | 2 | 1408.392 |
| IPI00166729 | 1      | 11/ 22 | R.YSLTYIYTGLSK.H                            | 1 | 1409.792 |
| IPI00166729 | 0.9835 | 12/ 22 | R.YSLTYIYTGLSK.H                            | 1 | 1407.792 |
| IPI00166729 | 0.9997 | 19/ 22 | R.YSLTYIYTGLSK.H<br>K.C[160.14]LAYDFYPGK    | 2 | 1409.392 |
| IPI00166729 | 0.9779 | 12/ 18 | .I                                          | 1 | 1233.692 |
| IPI00166729 | 0.9967 | 20/ 26 | I.PAWVPFDPAQAQITK.Q<br>K.EIPAWVPFDPAQAQITK. | 2 | 1540.892 |
| IPI00166729 | 1      | 18/ 30 | Q                                           | 1 | 1782.992 |
| IPI00166729 | 0.999  | 15/ 18 | K.C[160.14]LAYDFYPGK<br>.I                  | 2 | 1233.592 |
| IPI00166729 | 0.9891 | 14/ 18 | K.C[160.14]LAYDFYPGK<br>.I                  | 2 | 1234.792 |
| IPI00166729 | 0.9981 | 16/ 22 | R.YSLTYIYTGLSK.H                            | 2 | 1408.592 |
| IPI00166729 | 0.9984 | 20/ 30 | K.EIPAWVPFDPAQAQITK.<br>Q                   | 2 | 1784.092 |
| IPI00166729 | 0.9997 | 28/ 56 | D.PPSVVVTSHQAPGEK.<br>K                     | 3 | 1533.692 |
| IPI00166729 | 1      | 18/ 22 | K.AYLEEEEC[160.14]PAT<br>LR.K               | 2 | 1450.992 |
| IPI00166729 | 0.9587 | 16/ 20 | W.VPFDPAQAQITK.Q                            | 2 | 1185.992 |
| IPI00166729 | 0.998  | 15/ 18 | K.C[160.14]LAYDFYPGK<br>.I                  | 2 | 1234.792 |
| IPI00166729 | 0.9991 | 15/ 18 | K.C[160.14]LAYDFYPGK<br>.I                  | 2 | 1234.192 |
| IPI00166729 | 0.9976 | 19/ 22 | R.YSLTYIYTGLSK.H                            | 2 | 1409.292 |
| IPI00166729 | 0.9996 | 22/ 30 | K.EIPAWVPFDPAQAQITK.<br>Q                   | 2 | 1783.592 |
| IPI00166729 | 0.9993 | 20/ 26 | I.PAWVPFDPAQAQITK.Q<br>K.EIPAWVPFDPAQAQITK. | 2 | 1540.992 |
| IPI00166729 | 0.9998 | 21/ 30 | Q                                           | 2 | 1783.792 |
| IPI00166729 | 0.9979 | 14/ 30 | K.EIPAWVPFDPAQAQITK.<br>Q                   | 2 | 1783.092 |
| IPI00166729 | 0.9972 | 18/ 22 | K.AYLEEEEC[160.14]PAT<br>LR.K               | 2 | 1453.492 |
| IPI00166729 | 0.9978 | 15/ 20 | W.VPFDPAQAQITK.Q                            | 2 | 1186.892 |
| IPI00166729 | 0.9997 | 15/ 18 | K.C[160.14]LAYDFYPGK<br>.I                  | 2 | 1233.992 |
| IPI00166729 | 0.9987 | 19/ 22 | R.YSLTYIYTGLSK.H                            | 2 | 1408.692 |
| IPI00166729 | 0.9997 | 22/ 30 | K.EIPAWVPFDPAQAQITK.<br>Q                   | 2 | 1783.692 |
| IPI00166858 | 0.9861 | 13/ 26 | R.VVYSPGEPLAGTVR.V                          | 2 | 1444.992 |

|             |        |        |                                               |   |          |
|-------------|--------|--------|-----------------------------------------------|---|----------|
| IPI00166866 | 0.9592 | 38/ 80 | K.KGDTFSC[160.14]M[147.19]VGHEALPLAFTQ<br>K.T | 3 | 2353.792 |
| IPI00166866 | 0.9424 | 38/ 80 | K.KGDTFSC[160.14]M[147.19]VGHEALPLAFTQ<br>K.T | 3 | 2355.392 |
| IPI00166866 | 0.9189 | 31/ 76 | K.GDTFSC[160.14]M[147.19]VGHEALPLAFTQ<br>.T   | 3 | 2225.992 |
| IPI00167811 | 0.9484 | 23/ 30 | R.YLPSSSTPLTLSFFVK.V                          | 2 | 1787.892 |
| IPI00168479 | 0.9996 | 14/ 22 | K.LFGYEPTIYYPK.R                              | 2 | 1490.792 |
| IPI00168728 | 0.979  | 12/ 18 | K.NQVSLTC[160.14]LVK<br>.G                    | 1 | 1160.692 |
| IPI00168728 | 0.9991 | 16/ 18 | K.NQVSLTC[160.14]LVK<br>.G                    | 2 | 1161.792 |
| IPI00168728 | 0.9232 | 15/ 18 | K.NQVSLTC[160.14]LVK<br>.G                    | 2 | 1161.692 |
| IPI00168728 | 0.985  | 13/ 18 | K.NQVSLTC[160.14]LVK<br>.G                    | 2 | 1161.192 |
| IPI00168728 | 0.999  | 16/ 18 | K.NQVSLTC[160.14]LVK<br>.G                    | 2 | 1161.692 |
| IPI00168728 | 0.9984 | 15/ 18 | K.NQVSLTC[160.14]LVK<br>.G                    | 2 | 1161.492 |
| IPI00168728 | 0.9034 | 14/ 18 | K.NQVSLTC[160.14]LVK<br>.G                    | 2 | 1162.092 |
| IPI00168728 | 0.9695 | 13/ 18 | K.NQVSLTC[160.14]LVK<br>.G                    | 2 | 1161.092 |
| IPI00168728 | 0.9986 | 15/ 18 | K.NQVSLTC[160.14]LVK<br>.G                    | 2 | 1162.092 |
| IPI00168728 | 0.9911 | 15/ 18 | K.NQVSLTC[160.14]LVK<br>.G                    | 2 | 1161.292 |
| IPI00168728 | 0.9205 | 17/ 20 | K.NQVSLTC[160.14]LVK<br>G.F                   | 2 | 1218.392 |
| IPI00168728 | 0.926  | 16/ 20 | K.NQVSLTC[160.14]LVK<br>G.F                   | 2 | 1218.492 |
| IPI00168728 | 0.9675 | 17/ 20 | G.F                                           | 2 | 1218.592 |
| IPI00168728 | 0.9298 | 13/ 20 | R.EPQVYTLPPSR.E<br>R.VSVLTVLHQDWLNG           | 2 | 1286.792 |
| IPI00168728 | 0.9894 | 18/ 30 | K.E                                           | 2 | 1808.092 |
| IPI00168728 | 0.9995 | 22/ 32 | A.PELLGGPSVFLFPPKPK<br>.D                     | 2 | 1823.792 |
| IPI00168728 | 0.9988 | 25/ 32 | A.PELLGGPSVFLFPPKPK<br>.D                     | 2 | 1823.892 |
| IPI00168728 | 0.9931 | 17/ 38 | R.C[160.14]PAPELLGGP<br>SVFLFPPKPK.D          | 2 | 2150.292 |
| IPI00168728 | 0.9979 | 22/ 32 | A.PELLGGPSVFLFPPKPK<br>.D                     | 2 | 1823.492 |

|             |        |        |                                      |   |          |
|-------------|--------|--------|--------------------------------------|---|----------|
| IPI00168728 | 1      | 23/ 32 | A.PELLGGPSVFLFPPKPK<br>.D            | 2 | 1822.992 |
| IPI00168728 | 0.9997 | 24/ 36 | C.PAPELLGGPSVFLFPPK<br>PK.D          | 2 | 1990.892 |
| IPI00168728 | 0.9999 | 30/ 68 | P.APELLGGPSVFLFPPKPK<br>K.D          | 3 | 1895.792 |
| IPI00168728 | 0.9988 | 24/ 32 | A.PELLGGPSVFLFPPKPK<br>.D            | 2 | 1823.092 |
| IPI00168728 | 0.9999 | 32/ 76 | R.C[160.14]PAPELLGGP<br>SVFLFPPKPK.D | 3 | 2151.992 |
| IPI00168728 | 0.9971 | 23/ 32 | A.PELLGGPSVFLFPPKPK<br>.D            | 2 | 1822.992 |
| IPI00168728 | 0.9999 | 29/ 76 | R.C[160.14]PAPELLGGP<br>SVFLFPPKPK.D | 3 | 2152.092 |
| IPI00168728 | 0.9841 | 28/ 64 | A.PELLGGPSVFLFPPKPK<br>.D            | 3 | 1823.492 |
| IPI00168728 | 0.9991 | 20/ 38 | R.C[160.14]PAPELLGGP<br>SVFLFPPKPK.D | 2 | 2154.092 |
| IPI00168728 | 0.9806 | 18/ 38 | R.C[160.14]PAPELLGGP<br>SVFLFPPKPK.D | 2 | 2149.892 |
| IPI00168728 | 0.9847 | 22/ 32 | A.PELLGGPSVFLFPPKPK<br>.D            | 2 | 1822.492 |
| IPI00168728 | 0.9814 | 31/ 64 | A.PELLGGPSVFLFPPKPK<br>.D            | 3 | 1825.492 |
| IPI00168728 | 0.9938 | 22/ 32 | A.PELLGGPSVFLFPPKPK<br>.D            | 2 | 1822.992 |
| IPI00168728 | 0.9918 | 23/ 32 | A.PELLGGPSVFLFPPKPK<br>.D            | 2 | 1824.292 |
| IPI00168728 | 0.9974 | 20/ 32 | A.PELLGGPSVFLFPPKPK<br>.D            | 2 | 1824.092 |
| IPI00168728 | 0.9999 | 33/ 76 | R.C[160.14]PAPELLGGP<br>SVFLFPPKPK.D | 3 | 2152.492 |
| IPI00168728 | 0.972  | 15/ 36 | C.PAPELLGGPSVFLFPPK<br>PK.D          | 2 | 1991.392 |
| IPI00168728 | 0.9811 | 18/ 38 | R.C[160.14]PAPELLGGP<br>SVFLFPPKPK.D | 2 | 2150.592 |
| IPI00168728 | 0.9993 | 20/ 38 | R.C[160.14]PAPELLGGP<br>SVFLFPPKPK.D | 2 | 2153.992 |
| IPI00168728 | 0.9968 | 15/ 22 | K.GPSVFPLAPC[160.14]<br>SR.S         | 2 | 1287.492 |
| IPI00168728 | 0.9876 | 15/ 22 | K.GPSVFPLAPC[160.14]<br>SR.S         | 2 | 1287.692 |
| IPI00168728 | 0.9868 | 14/ 22 | K.GPSVFPLAPC[160.14]<br>SR.S         | 2 | 1286.992 |
| IPI00168728 | 0.9884 | 16/ 22 | K.GPSVFPLAPC[160.14]<br>SR.S         | 2 | 1287.692 |
| IPI00168728 | 0.9958 | 15/ 22 | K.GPSVFPLAPC[160.14]<br>SR.S         | 2 | 1287.292 |

|             |        |        |                            |   |          |
|-------------|--------|--------|----------------------------|---|----------|
| IPI00168728 | 0.9972 | 20/ 26 | R.STSGGTAALGC[160.14]LVK.D | 2 | 1320.792 |
| IPI00168728 | 0.9993 | 20/ 26 | R.STSGGTAALGC[160.14]LVK.D | 2 | 1321.492 |
| IPI00168728 | 0.9992 | 18/ 26 | R.STSGGTAALGC[160.14]LVK.D | 2 | 1322.792 |
| IPI00168728 | 0.9901 | 21/ 26 | R.STSGGTAALGC[160.14]LVK.D | 2 | 1321.592 |
| IPI00168728 | 0.9999 | 21/ 26 | R.STSGGTAALGC[160.14]LVK.D | 2 | 1322.292 |
| IPI00169383 | 0.9526 | 21/ 30 | K.AC[160.14]ANPAAGS        | 2 | 1612.292 |
| IPI00178767 | 1      | 24/ 32 | VILLENL.R                  | 2 | 1682.792 |
| IPI00178926 | 0.9899 | 21/ 36 | K.S                        | 2 | 1682.792 |
| IPI00178926 | 0.9988 | 23/ 28 | R.FVYHLS DLC[160.14]       | 3 | 1282.892 |
| IPI00178926 | 0.9993 | 22/ 28 | K.K                        | 2 | 1656.792 |
| IPI00178926 | 0.9939 | 25/ 40 | K.C[160.14]YTAVVPLVY       | 2 | 1656.692 |
| IPI00178926 | 0.9197 | 21/ 36 | GGETK.M                    | 3 | 1410.492 |
| IPI00178926 | 0.9946 | 22/ 28 | R.FVYHLS DLC[160.14]       | 3 | 1282.492 |
| IPI00179185 | 0.9998 | 17/ 18 | KK.C                       | 2 | 1655.992 |
| IPI00179291 | 1      | 22/ 30 | R.FVYHLS DLC[160.14]       | 2 | 1069.592 |
| IPI00179330 | 0.9808 | 13/ 16 | R.GSLTFEPLTLVPIQTK.M       | 2 | 1743.792 |
| IPI00179330 | 0.9847 | 12/ 16 | R.TLSDYNIQK.E              | 2 | 1081.592 |
| IPI00179330 | 0.9992 | 17/ 30 | R.TLSDYNIQK.E              | 2 | 1081.692 |
| IPI00179330 | 0.9999 | 20/ 30 | K.TITLEVEPSDTIENVK.        | 2 | 1789.392 |
| IPI00179330 | 0.9993 | 17/ 30 | A                          | 2 | 1788.792 |
| IPI00179330 | 0.9999 | 23/ 30 | K.TITLEVEPSDTIENVK.        | 2 | 1789.092 |
| IPI00179330 | 0.9996 | 23/ 30 | A                          | 2 | 1789.092 |
| IPI00179330 | 1      | 23/ 30 | K.TITLEVEPSDTIENVK.        | 2 | 1788.792 |
| IPI00179330 | 0.9999 | 22/ 30 | A                          | 2 | 1787.992 |
| IPI00179330 | 0.9996 | 21/ 30 | K.TITLEVEPSDTIENVK.        | 2 | 1789.092 |
| IPI00180956 | 0.9899 | 15/ 16 | A                          | 2 | 1787.092 |
|             |        |        | R.VLDELTLAR.A              | 2 | 1028.792 |

|             |        |          |                                 |   |          |
|-------------|--------|----------|---------------------------------|---|----------|
| IPI00186308 | 0.9916 | 13/ 22   | R.AQLIQMS[167.08]WT<br>ALR.A    | 2 | 1498.692 |
| IPI00215914 | 0.9993 | 18/ 20   | R.ILM[147.19]VGLDAA<br>GK.T     | 2 | 1103.992 |
| IPI00215925 | 0.9157 | 23/ 56   | R.NYDHILSTGC[160.14<br>]APPGK.N | 3 | 1630.492 |
| IPI00215979 | 0.9527 | 14/ 20   | K.VC[160.14]DVPLDQL<br>PR.S     | 2 | 1312.792 |
| IPI00215983 |        | 1 32/ 68 | K.HDTSLKPISVSYNPATA<br>K.E      | 3 | 1929.592 |
| IPI00215983 |        | 1 34/ 68 | K.HDTSLKPISVSYNPATA<br>K.E      | 3 | 1928.592 |
| IPI00215983 | 0.9522 | 12/ 16   | K.VLDALQAIK.T                   | 2 | 970.692  |
| IPI00215983 | 0.9983 | 18/ 22   | K.ADGLAVIGVLM[147.1<br>9]K.V    | 2 | 1202.492 |
| IPI00215997 | 0.9989 | 14/ 18   | K.KDVLETFTVK.S                  | 2 | 1179.592 |
| IPI00216057 | 0.9989 | 16/ 32   | R.LENYPIPEPGPNEVLLR<br>.M       | 2 | 1950.992 |
| IPI00216691 | 0.998  | 12/ 14   | K.TLVLLM[147.19]GK.E            | 2 | 890.292  |
| IPI00216691 | 0.9967 | 19/ 26   | R.SSFYVNGLTLGGQK.C              | 2 | 1471.392 |
| IPI00216691 | 0.9998 | 21/ 26   | R.DSLLQDGEFSM[147.1<br>9]DLR.T  | 2 | 1641.292 |
| IPI00216691 | 0.9999 | 23/ 30   | K.TFVNITPAEVGVLVGK.<br>D        | 2 | 1643.692 |
| IPI00216691 | 0.9729 | 22/ 30   | K.TFVNITPAEVGVLVGK.<br>D        | 2 | 1644.092 |
| IPI00216691 | 0.993  | 20/ 26   | R.SSFYVNGLTLGGQK.C              | 2 | 1472.192 |
| IPI00216773 | 0.9794 | 16/ 20   | K.KLVAASQAALG.L                 | 2 | 1027.792 |
| IPI00216773 | 0.9949 | 18/ 20   | K.LVAASQAALGL.-                 | 2 | 1013.292 |
| IPI00216773 | 0.9906 | 17/ 20   | K.LVAASQAALGL.-                 | 2 | 1013.492 |
| IPI00216773 | 0.9996 | 16/ 20   | K.LVAASQAALGL.-                 | 2 | 1013.592 |
| IPI00216773 | 0.9021 | 15/ 20   | K.LVAASQAALGL.-                 | 2 | 1013.692 |
| IPI00216773 | 0.9909 | 17/ 20   | K.LVAASQAALGL.-                 | 2 | 1014.092 |
| IPI00216773 | 0.9935 | 14/ 20   | K.LVAASQAALGL.-                 | 2 | 1013.092 |
| IPI00216773 | 0.9946 | 17/ 20   | K.LVAASQAALGL.-                 | 2 | 1014.092 |
| IPI00216773 | 0.9991 | 18/ 20   | K.LVAASQAALGL.-                 | 2 | 1012.792 |
| IPI00216773 | 0.9964 | 17/ 22   | K.KLVAASQAALGL.-                | 2 | 1141.792 |
| IPI00216773 | 0.9997 | 17/ 20   | K.LVAASQAALGL.-                 | 2 | 1012.992 |
| IPI00216773 | 0.9938 | 16/ 20   | K.LVAASQAALGL.-                 | 2 | 1012.992 |
| IPI00216773 | 0.9978 | 18/ 20   | K.LVAASQAALGL.-                 | 2 | 1012.192 |
| IPI00216773 | 0.9943 | 16/ 20   | K.LVAASQAALGL.-                 | 2 | 1013.492 |
| IPI00216773 | 0.9977 | 16/ 22   | K.KLVAASQAALGL.-                | 2 | 1141.092 |
| IPI00216773 | 0.9692 | 17/ 20   | K.LVAASQAALGL.-                 | 2 | 1013.392 |
| IPI00216773 | 0.9989 | 16/ 20   | K.LVAASQAALGL.-                 | 2 | 1012.992 |
| IPI00216773 | 0.9453 | 10/ 20   | K.LVAASQAALGL.-                 | 2 | 1013.192 |
| IPI00216773 | 0.9214 | 10/ 22   | K.KLVAASQAALGL.-                | 1 | 1140.792 |

|             |        |        |                      |   |          |
|-------------|--------|--------|----------------------|---|----------|
| IPI00216773 | 0.9719 | 17/ 22 | K.KLVAASQAALGL.-     | 2 | 1144.092 |
| IPI00216773 | 0.9999 | 17/ 20 | K.LVAASQAALGL.-      | 2 | 1013.792 |
| IPI00216773 | 0.9995 | 16/ 20 | K.LVAASQAALGL.-      | 2 | 1013.992 |
| IPI00216773 | 0.9847 | 17/ 20 | K.LVAASQAALGL.-      | 2 | 1014.792 |
| IPI00216773 | 0.9913 | 18/ 20 | K.LVAASQAALGL.-      | 2 | 1013.392 |
| IPI00216773 | 0.9962 | 17/ 22 | K.KLVAASQAALGL.-     | 2 | 1141.392 |
| IPI00217232 | 0.955  | 12/ 14 | R.LVAVATLR.N         | 2 | 842.392  |
| IPI00217471 | 0.9417 | 16/ 18 | R.LLVVYPWTQR.F       | 2 | 1276.392 |
| IPI00217471 | 0.9396 | 16/ 18 | R.LLVVYPWTQR.F       | 2 | 1276.692 |
| IPI00217471 | 0.9095 | 16/ 18 | R.LLVVYPWTQR.F       | 2 | 1275.592 |
|             |        |        | K.NHEEEM[147.19]LAL  |   |          |
| IPI00217963 | 0.9009 | 14/ 18 | R.G                  | 2 | 1258.492 |
|             |        |        |                      |   |          |
| IPI00217963 | 0.9978 | 21/ 26 | R.APSTYGGGLSVSSR.F   | 2 | 1338.692 |
| IPI00217963 | 0.9996 | 17/ 20 | K.ASLENSLEETK.G      | 2 | 1220.492 |
|             |        |        | E.MAEEAGEENFFIFGM[   |   |          |
| IPI00218130 | 0.939  | 17/ 30 | 147.19]R.V           | 2 | 1895.992 |
|             |        |        | K.YDPSLKPLSVSYDQAT   |   |          |
| IPI00218414 | 0.9952 | 27/ 72 | SLR.I                | 3 | 2140.592 |
|             |        |        | K.AVQQPDGLAVLGIFLK.  |   |          |
| IPI00218414 | 0.9999 | 24/ 30 | V                    | 2 | 1668.992 |
|             |        |        | K.DTTTPIQSM[147.19]  |   |          |
|             |        |        | M[147.19]C[160.14]QY |   |          |
| IPI00218736 | 0.98   | 17/ 26 | L.A                  | 2 | 1720.492 |
|             |        |        | A.SC[160.14]YFIPNEGV |   |          |
| IPI00218911 | 0.9922 | 22/ 30 | PGDSTR.M             | 2 | 1799.192 |
|             |        |        | A.SC[160.14]YFIPNEGV |   |          |
| IPI00218911 | 0.9981 | 17/ 30 | PGDSTR.M             | 2 | 1799.292 |
|             |        |        | A.SC[160.14]YFIPNEGV |   |          |
| IPI00218911 | 0.9875 | 24/ 30 | PGDSTR.M             | 2 | 1798.892 |
|             |        |        | A.SC[160.14]YFIPNEGV |   |          |
| IPI00218911 | 1      | 24/ 30 | PGDSTR.M             | 2 | 1799.492 |
|             |        |        | A.SC[160.14]YFIPNEGV |   |          |
| IPI00218911 | 0.9915 | 22/ 30 | PGDSTR.M             | 2 | 1798.692 |
|             |        |        | A.SC[160.14]YFIPNEGV |   |          |
| IPI00218911 | 0.9999 | 17/ 30 | PGDSTR.M             | 2 | 1798.492 |
|             |        |        | A.SC[160.14]YFIPNEGV |   |          |
| IPI00218911 | 0.9992 | 25/ 30 | PGDSTR.M             | 2 | 1799.392 |
|             |        |        | K.GGPGSAVSPYPTFNPS   |   |          |
| IPI00218918 | 1      | 31/ 92 | SDVAALHK.A           | 3 | 2356.592 |
| IPI00218918 | 0.9913 | 17/ 24 | K.GVDEATIIDILTK.R    | 2 | 1387.792 |
|             |        |        | K.WGDAGAEYVVESTGV    |   |          |
| IPI00219018 | 0.9936 | 34/ 80 | FTTMEK.A             | 3 | 2278.792 |
|             |        |        | K.WGDAGAEYVVESTGV    |   |          |
| IPI00219018 | 0.9959 | 30/ 80 | FTTM[147.19]EK.A     | 3 | 2293.292 |
|             |        |        | K.WGDAGAEYVVESTGV    |   |          |
| IPI00219018 | 0.9675 | 31/ 80 | FTTMEK.A             | 3 | 2276.192 |
|             |        |        | K.WGDAGAEYVVESTGV    |   |          |
| IPI00219018 | 0.9965 | 23/ 40 | FTTMEK.A             | 2 | 2276.892 |

|             |        |        |                                                        |   |          |
|-------------|--------|--------|--------------------------------------------------------|---|----------|
| IPI00219018 | 0.9952 | 30/ 80 | K.WGDAGAEYVVESTGV<br>FTTMEK.A                          | 3 | 2277.092 |
| IPI00219018 | 0.9594 | 29/ 80 | K.WGDAGAEYVVESTGV<br>FTTMEK.A                          | 3 | 2277.292 |
| IPI00219018 | 0.9999 | 25/ 32 | K.IISNASC[160.14]TTN<br>C[160.14]LAPLAK.V              | 2 | 1833.592 |
| IPI00219018 | 0.902  | 17/ 28 | R.GALQNIIPASTGAAK.A                                    | 2 | 1412.692 |
| IPI00219018 | 0.9999 | 24/ 32 | K.IISNASC[160.14]TTN<br>C[160.14]LAPLAK.V              | 2 | 1833.492 |
| IPI00219018 | 0.9594 | 17/ 28 | R.GALQNIIPASTGAAK.A                                    | 2 | 1411.492 |
| IPI00219018 | 0.9985 | 31/ 92 | K.VIHDNFGIVEGLM[147<br>.19]TTVHAITATQK.T               | 3 | 2613.392 |
| IPI00219682 | 0.9948 | 16/ 30 | K.GPGLFFILPC[160.14]<br>TDSFIK.V                       | 2 | 1811.892 |
| IPI00219682 | 0.9686 | 23/ 36 | K.NSTIVFPLPIDM[147.1<br>9]LQGIIGA.K                    | 2 | 2015.692 |
| IPI00219757 | 0.9979 | 16/ 20 | -.PPYTVVYFPVR.G                                        | 2 | 1338.592 |
| IPI00219757 | 0.9845 | 16/ 20 | -.PPYTVVYFPVR.G                                        | 2 | 1337.592 |
| IPI00220120 | 0.9614 | 30/ 36 | C.EVQLLESGGGLVQPGG<br>SLR.L                            | 2 | 1896.792 |
| IPI00220120 | 0.97   | 30/ 36 | C.EVQLLESGGGLVQPGG<br>SLR.L                            | 2 | 1896.692 |
| IPI00220327 | 0.9998 | 15/ 18 | K.NM[147.19]QDM[147<br>.19]VEDYR.N                     | 2 | 1332.192 |
| IPI00220327 | 1      | 25/ 60 | R.GGGGGGYGSGGSSY<br>GSGGGSYGSGGGGGGG<br>R.G            | 2 | 2383.492 |
| IPI00220327 | 0.9984 | 51/120 | R.GGGGGGYGSGGSSY<br>GSGGGSYGSGGGGGGG<br>R.G            | 3 | 2384.592 |
| IPI00220327 | 0.957  | 12/ 16 | R.SLVNLGGSK.S                                          | 2 | 873.792  |
| IPI00220327 | 0.9619 | 20/ 44 | R.TNAENEFVTIKK.D                                       | 3 | 1393.292 |
| IPI00220327 | 0.9957 | 17/ 18 | K.YEELQITAGR.H                                         | 2 | 1179.292 |
| IPI00220327 | 0.9904 | 18/ 20 | R.TNAENEFVTIK.K                                        | 2 | 1266.692 |
| IPI00220327 | 0.9909 | 18/ 28 | K.QISNLQQSISDAEQR.<br>G                                | 2 | 1716.692 |
| IPI00220327 | 0.9992 | 20/ 22 | K.LNDLEDALQQAK.E<br>K.NM[147.19]QDM[147<br>.19]VEDYR.N | 2 | 1357.392 |
| IPI00220327 | 0.9989 | 15/ 18 | K.YEELQITAGR.H                                         | 2 | 1332.392 |
| IPI00220327 | 0.996  | 17/ 18 | K.YEELQITAGR.H<br>K.QISNLQQSISDAEQR.                   | 2 | 1179.292 |
| IPI00220327 | 0.9991 | 19/ 28 | G                                                      | 2 | 1716.392 |
| IPI00220327 | 0.9997 | 18/ 22 | K.SLNNQFASFIDK.V                                       | 2 | 1382.692 |

|             |        |          |                                            |   |          |
|-------------|--------|----------|--------------------------------------------|---|----------|
| IPI00220327 |        | 1 25/ 60 | R.GGGGGGYGSGGSSY<br>GSGGGSYSGGGGGGG<br>R.G | 2 | 2383.692 |
| IPI00220327 | 0.9952 | 49/120   | R.GGGGGGYGSGGSSY<br>GSGGGSYSGGGGGGG<br>R.G | 3 | 2384.392 |
| IPI00220327 | 0.992  | 13/ 16   | R.SLVNLGGSK.S                              | 2 | 873.992  |
| IPI00220327 | 0.9892 | 17/ 18   | K.YEELQITAGR.H                             | 2 | 1179.392 |
| IPI00220327 | 0.9742 | 16/ 20   | R.TNAENEFVTIK.K                            | 2 | 1265.492 |
| IPI00220327 | 0.9894 | 15/ 18   | K.NM[147.19]QDM[147<br>.19]VEDYR.N         | 2 | 1331.492 |
| IPI00220327 | 0.9239 | 15/ 18   | K.NM[147.19]QDM[147<br>.19]VEDYR.N         | 2 | 1331.892 |
| IPI00220327 | 0.9993 | 27/ 60   | R.GGGGGGYGSGGSSY<br>GSGGGSYSGGGGGGG<br>R.G | 2 | 2384.392 |
| IPI00220327 | 0.9964 | 47/120   | R.GGGGGGYGSGGSSY<br>GSGGGSYSGGGGGGG<br>R.G | 3 | 2383.892 |
| IPI00220327 | 0.9984 | 16/ 20   | R.TNAENEFVTIK.K                            | 2 | 1267.392 |
| IPI00220327 | 0.9996 | 18/ 22   | K.SLNNQFASFIDK.V                           | 2 | 1384.592 |
| IPI00220327 | 0.9998 | 19/ 22   | R.SLDLDSIIAEVK.A                           | 2 | 1301.792 |
| IPI00220706 | 0.9996 | 21/ 22   | K.M[147.19]VTAVASAL<br>SSR.Y               | 2 | 1209.092 |
| IPI00220706 |        | 1 22/ 24 | K.VNVEDAGGETLGR.L                          | 2 | 1316.192 |
| IPI00220766 | 0.9975 | 14/ 18   | K.DFLLQQTM[147.19]L<br>R.V                 | 2 | 1281.092 |
| IPI00220993 | 0.9907 | 14/ 16   | R.AIFTGYYGK.G                              | 2 | 1019.592 |
| IPI00221224 | 0.946  | 14/ 20   | K.DLTALSNM[147.19]LP<br>K.G                | 2 | 1218.792 |
| IPI00221224 | 0.9999 | 21/ 30   | R.ENSLFDPLSSSSSNK.<br>E                    | 2 | 1724.692 |
| IPI00221224 | 0.9963 | 16/ 30   | R.QYMPWEAALSSLSYFK<br>.L                   | 2 | 1921.792 |
| IPI00221224 | 0.9971 | 16/ 20   | K.DLTALSNM[147.19]LP<br>K.G                | 2 | 1217.892 |
| IPI00221224 | 0.9658 | 16/ 20   | K.DLTALSNMLPK.G                            | 2 | 1203.492 |
| IPI00221224 | 0.9886 | 14/ 18   | F.IVSEFDYVEK.Q                             | 2 | 1228.792 |
| IPI00221224 | 0.9859 | 12/ 20   | K.DLTALSNM[147.19]LP<br>K.G                | 2 | 1217.992 |
| IPI00221224 | 0.9983 | 23/ 30   | R.ENSLFDPLSSSSSNK.<br>E                    | 2 | 1725.592 |
| IPI00221224 | 0.9188 | 13/ 20   | K.DLTALSNMLPK.G                            | 2 | 1202.192 |
| IPI00242956 | 0.9989 | 15/ 22   | K.LDSLVAQQLQSK.N                           | 2 | 1329.092 |
| IPI00242956 | 0.9964 | 16/ 18   | R.VSYVGLVTVR.A                             | 2 | 1093.292 |
| IPI00242956 | 0.9743 | 17/ 18   | R.VSYVGLVTVR.A                             | 2 | 1092.492 |



|             |        |        |                                                              |   |          |
|-------------|--------|--------|--------------------------------------------------------------|---|----------|
| IPI00242956 | 0.9996 | 39/124 | K.FDFQGTC[160.14]NY<br>VLATTGC[160.14]PGVS<br>TQGLTPFTVTTK.N | 3 | 3470.492 |
| IPI00242956 | 0.9484 | 24/124 | K.FDFQGTC[160.14]NY<br>VLATTGC[160.14]PGVS<br>TQGLTPFTVTTK.N | 3 | 3468.992 |
| IPI00242956 | 0.9968 | 16/ 30 | R.VNGVLTALPVSVADGR<br>.I                                     | 2 | 1567.992 |
| IPI00242956 | 0.9934 | 18/ 30 | R.VNGVLTALPVSVADGR<br>.I                                     | 2 | 1567.992 |
| IPI00242956 | 0.9987 | 42/124 | K.FDFQGTC[160.14]NY<br>VLATTGC[160.14]PGVS<br>TQGLTPFTVTTK.N | 3 | 3470.792 |
| IPI00242956 | 0.939  | 16/ 20 | K.LPVVLANGQIR.A                                              | 2 | 1179.692 |
| IPI00242956 | 0.9979 | 15/ 18 | R.VAYDLVYYVR.V                                               | 2 | 1260.092 |
| IPI00242956 | 0.9912 | 15/ 18 | R.VAYDLVYYVR.V                                               | 2 | 1260.292 |
| IPI00242956 | 0.9967 | 15/ 18 | R.VAYDLVYYVR.V                                               | 2 | 1261.192 |
| IPI00242956 | 0.9985 | 15/ 18 | R.VAYDLVYYVR.V                                               | 2 | 1260.692 |
| IPI00242956 | 0.9979 | 15/ 18 | R.VAYDLVYYVR.V                                               | 2 | 1261.892 |
| IPI00242956 | 0.9979 | 14/ 18 | R.VAYDLVYYVR.V                                               | 2 | 1260.092 |
| IPI00242956 | 0.9985 | 15/ 18 | R.VAYDLVYYVR.V                                               | 2 | 1260.092 |
| IPI00242956 | 0.9949 | 15/ 18 | R.VAYDLVYYVR.V                                               | 2 | 1260.992 |
| IPI00242956 | 0.9999 | 15/ 18 | R.VAYDLVYYVR.V                                               | 2 | 1260.892 |
| IPI00246058 | 1      | 23/ 30 | R.SVIEQGGIQTVDQLIK.<br>E                                     | 2 | 1727.692 |
| IPI00247063 | 0.9985 | 19/ 24 | K.ALYGTTSETATWR.R<br>R.LPIDENQLALEM[147.<br>19]NK.V          | 2 | 1456.692 |
| IPI00247063 | 0.9984 | 21/ 26 | K.ALYGTTSETATWR.R                                            | 2 | 1643.992 |
| IPI00247063 | 0.9987 | 20/ 24 | R.ALLSYDGLNQR.V                                              | 2 | 1455.892 |
| IPI00259102 | 0.9954 | 16/ 20 | R.ALLSYDGLNQR.V                                              | 2 | 1249.592 |
| IPI00289831 | 0.9999 | 20/ 24 | R.SPQGLGAFTPVVR.Q                                            | 2 | 1328.692 |
| IPI00289831 | 0.9994 | 15/ 24 | R.SPQGLGAFTPVVR.Q                                            | 2 | 1328.792 |
| IPI00289983 | 0.9524 | 15/ 16 | K.RATQIPSYK.K                                                | 2 | 1063.592 |
| IPI00289983 | 0.9837 | 11/ 14 | R.ATQIPSYK.K                                                 | 1 | 907.492  |
| IPI00289983 | 0.9913 | 10/ 14 | R.ATQIPSYK.K                                                 | 1 | 905.892  |
| IPI00289983 | 0.9555 | 13/ 14 | R.ATQIPSYK.K                                                 | 2 | 906.692  |
| IPI00289983 | 0.9382 | 12/ 12 | K.FLNESYK.H                                                  | 2 | 899.692  |
| IPI00289983 | 0.9786 | 13/ 16 | K.RATQIPSYK.K                                                | 2 | 1062.392 |
| IPI00289983 | 0.9926 | 16/ 18 | R.FQELESETLK.S                                               | 2 | 1223.392 |
| IPI00289983 | 0.9908 | 14/ 18 | R.FQELESETLK.S                                               | 1 | 1222.592 |
| IPI00289983 | 0.9641 | 16/ 18 | R.FQELESETLK.S                                               | 2 | 1223.392 |
| IPI00289983 | 0.9947 | 25/ 60 | K.LIM[147.19]YSAHDTT<br>VSGLQM[147.19].A                     | 3 | 1800.492 |

|             |        |          |                                                                |   |          |
|-------------|--------|----------|----------------------------------------------------------------|---|----------|
| IPI00289983 | 0.9994 | 33/ 60   | R.FQELESETLKSEEFQK.<br>R                                       | 3 | 1971.692 |
| IPI00289983 | 0.9189 | 24/ 30   | K.LIM[147.19]YSAHDTT                                           | 2 | 1799.492 |
| IPI00289983 |        | 1 11/ 16 | VSGLQM[147.19].A                                               | 1 | 993.492  |
| IPI00289983 | 0.9974 | 26/ 60   | R.SPIDTFPTD.P<br>R.HGDRSPIDTFPTDPIK.<br>E                      | 3 | 1796.592 |
| IPI00289983 | 0.9984 | 15/ 28   | R.LQGGVLVNEILNHM[1                                             | 2 | 1682.292 |
| IPI00289983 | 0.9616 | 11/ 14   | 47.19]K.R<br>K.DFIATLGK.L                                      | 1 | 863.492  |
| IPI00289983 | 0.9987 | 24/ 60   | R.HGDRSPIDTFPTDPIK.<br>E                                       | 3 | 1795.692 |
| IPI00289983 | 0.9765 | 13/ 14   | H.YELGEYIR.K                                                   | 2 | 1042.792 |
| IPI00289983 | 0.993  | 21/ 56   | R.LQGGVLVNEILNHM[1                                             | 3 | 1681.892 |
| IPI00289983 | 0.9568 | 13/ 14   | 47.19]K.R<br>K.DFIATLGK.L                                      | 2 | 863.792  |
| IPI00289983 | 0.9611 | 11/ 14   | K.DFIATLGK.L                                                   | 1 | 865.492  |
| IPI00289983 | 0.998  | 16/ 22   | R.SPIDTFPTDPIK.E                                               | 2 | 1329.792 |
| IPI00289983 | 0.9996 | 14/ 18   | K.GEYFVEM[147.19]YY<br>R.N                                     | 2 | 1372.192 |
| IPI00289983 | 0.9937 | 14/ 18   | K.GEYFVEM[147.19]YY<br>R.N                                     | 2 | 1375.392 |
| IPI00289983 | 0.9734 | 13/ 22   | R.SPIDTFPTDPIK.E                                               | 1 | 1329.692 |
| IPI00289983 | 0.9993 | 16/ 22   | R.SPIDTFPTDPIK.E                                               | 2 | 1330.092 |
| IPI00289983 | 0.998  | 17/ 22   | R.SPIDTFPTDPIK.E                                               | 2 | 1330.792 |
| IPI00289983 | 0.9813 | 13/ 14   | K.DFIATLGK.L                                                   | 2 | 864.192  |
| IPI00289983 | 0.99   | 15/ 22   | R.SPIDTFPTDPIK.E                                               | 2 | 1330.592 |
| IPI00289983 | 0.995  | 10/ 12   | K.FVTLVFR.H                                                    | 2 | 881.292  |
| IPI00289983 | 0.9982 | 19/ 24   | R.LQGGVLVNEILNH.M<br>R.LQGGVLVNEILNHM[1                        | 2 | 1405.192 |
| IPI00289983 | 0.9991 | 21/ 28   | 47.19]K.R                                                      | 2 | 1680.692 |
| IPI00289983 | 0.9943 | 20/ 22   | R.LQGGVLVNEILN.H                                               | 2 | 1268.492 |
| IPI00289983 | 0.9942 | 16/ 18   | R.FQELESETLK.S                                                 | 2 | 1223.692 |
| IPI00289983 | 0.9821 | 13/ 22   | R.SPIDTFPTDPIK.E<br>R.FAELVGPVIPQDWSTE<br>C[160.14]M[147.19]TT | 2 | 1330.692 |
| IPI00289983 | 0.9971 | 23/ 40   | N.S                                                            | 2 | 2411.392 |
| IPI00290078 | 0.9581 | 13/ 16   | K.VQFLEQQNK.V<br>R.GQAAVQQLQAEGLSP                             | 2 | 1133.492 |
| IPI00290462 |        | 1 24/ 30 | R.F                                                            | 2 | 1652.492 |
| IPI00290857 | 0.9932 | 15/ 20   | R.TAAENEFVTLK.K<br>R.DTTPLNVLC[160.14]S                        | 2 | 1223.192 |
| IPI00291136 | 0.9934 | 28/ 80   | PGIQVSVGIK.D<br>R.EILSVDC[160.14]STN                           | 3 | 2198.892 |
| IPI00291262 | 0.9997 | 17/ 30   | NPSQAK.L<br>R.EILSVDC[160.14]STN                               | 2 | 1763.092 |
| IPI00291262 | 0.9989 | 18/ 28   | NPSQA.K                                                        | 2 | 1636.292 |
| IPI00291262 | 0.9965 | 19/ 22   | D.PITVTVPEVSR.K                                                | 2 | 1296.692 |

|             |        |        |                                           |   |          |
|-------------|--------|--------|-------------------------------------------|---|----------|
| IPI00291262 | 1      | 23/ 30 | L.FSDPITVTVPVEVSR.<br>K                   | 2 | 1761.792 |
| IPI00291262 | 0.9942 | 24/ 32 | K.LFSDPITVTVPVEVSR<br>.K                  | 2 | 1873.892 |
| IPI00291262 | 0.9073 | 17/ 26 | K.LFSDPITVTVPVE.V<br>R.EILSVDC[160.14]STN | 2 | 1532.492 |
| IPI00291262 | 0.9962 | 17/ 28 | NPSQA.K<br>R.VTTVASHTSDSDVPSG             | 2 | 1635.392 |
| IPI00291262 | 0.9492 | 23/ 42 | VTEVVV.K                                  | 2 | 2185.792 |
| IPI00291262 | 0.9838 | 18/ 22 | D.PITVTVPVEVSR.K<br>K.GVTSVSQIFHSPDLAI    | 2 | 1296.992 |
| IPI00291866 | 0.9889 | 25/ 64 | R.D<br>K.GVTSVSQIFHSPDLAI                 | 3 | 1828.392 |
| IPI00291866 | 0.9999 | 29/ 64 | R.D                                       | 3 | 1828.792 |
| IPI00292530 | 0.9635 | 14/ 18 | K.LDAQASFLPK.E<br>-                       | 2 | 1089.392 |
| IPI00293276 | 0.9986 | 17/ 20 | .PM[147.19]FIVNTNVPR<br>.A<br>-           | 2 | 1303.792 |
| IPI00293276 | 0.9997 | 16/ 20 | .PM[147.19]FIVNTNVPR<br>.A<br>-           | 2 | 1304.892 |
| IPI00293276 | 0.9345 | 15/ 20 | .PM[147.19]FIVNTNVPR<br>.A                | 2 | 1302.892 |
| IPI00293276 | 0.9985 | 15/ 16 | K.LLC[160.14]GLLAER.<br>L<br>-            | 2 | 1044.792 |
| IPI00293276 | 0.9973 | 17/ 20 | .PM[147.19]FIVNTNVPR<br>.A                | 2 | 1302.692 |
| IPI00293665 | 0.9992 | 35/100 | R.ATGGGLSSVGGGSSTI<br>KYTTTSSSSR.K        | 3 | 2406.692 |
| IPI00294653 | 0.9986 | 23/ 30 | R.AGAQLLSSLSGYAYTK.<br>R                  | 2 | 1629.692 |
| IPI00295386 | 0.9998 | 18/ 20 | R.VVNVSSIM[147.19]S<br>VR.A               | 2 | 1206.592 |
| IPI00295386 | 0.9976 | 18/ 20 | R.VVNVSSIM[147.19]S<br>VR.A               | 2 | 1206.892 |
| IPI00295741 | 0.9856 | 19/ 24 | R.LC[160.14]GTFLGGP<br>KPPQ.R             | 2 | 1371.792 |
| IPI00295741 | 0.9982 | 18/ 24 | R.LC[160.14]GTFLGGP<br>KPPQ.R             | 2 | 1371.792 |
| IPI00296286 | 0.9996 | 17/ 22 | R.IGDTVTC[160.14]VC[<br>160.14]QFK.C      | 2 | 1427.692 |
| IPI00296803 | 0.9493 | 12/ 18 | R.QSFASDSSSK.S<br>R.YLIFPNPVC[160.14]L    | 1 | 1044.592 |
| IPI00296922 | 0.9843 | 27/ 32 | EPGISYK.L<br>R.YLIFPNPVC[160.14]L         | 2 | 2009.892 |
| IPI00296922 | 0.9921 | 14/ 32 | EPGISYK.L                                 | 2 | 2010.892 |

|             |        |        |                                                      |   |          |
|-------------|--------|--------|------------------------------------------------------|---|----------|
| IPI00296922 | 0.9324 | 13/ 32 | R.YLIFPNPVC[160.14]L<br>EPGISYK.L                    | 2 | 2010.692 |
| IPI00297444 | 0.9998 | 35/ 76 | R.GATHC[160.14]YDGY<br>IHLSGGGLSTK.M                 | 3 | 2094.592 |
| IPI00297444 | 0.9984 | 24/ 48 | A.LLC[160.14]QFGTVQ<br>HVWK.V                        | 3 | 1615.592 |
| IPI00297444 | 0.9973 | 18/ 24 | A.LLC[160.14]QFGTVQ<br>HVWK.V                        | 2 | 1615.992 |
| IPI00297444 | 0.975  | 13/ 16 | R.GGGIFSNLR.V                                        | 2 | 920.192  |
| IPI00298497 | 0.9998 | 26/ 72 | R.EEAPSLRPAPPPISGGG<br>YR.A                          | 3 | 1952.292 |
| IPI00298497 | 0.9991 | 21/ 28 | R.TPC[160.14]TVSC[16<br>0.14]NIPVVSGK.E              | 2 | 1619.792 |
| IPI00298497 | 0.9948 | 27/ 76 | R.KGGETSEM[147.19]Y<br>LIQPDSVVKPY.R                 | 3 | 2245.492 |
| IPI00298497 | 0.9928 | 24/ 32 | K.HQLYIDETVNSNIPTNL<br>.R                            | 2 | 1971.292 |
| IPI00298547 | 0.9258 | 30/100 | K.EGPDVVVLPGGNLGA<br>QNLSESAAVK.E                    | 3 | 2584.392 |
| IPI00298547 | 1      | 29/ 60 | K.VTVAGLAGKDPVQC[1<br>60.14]SR.D                     | 3 | 1659.592 |
| IPI00298828 | 0.9996 | 25/ 28 | K.FIC[160.14]PLTGLWP<br>INTLK.C                      | 2 | 1772.892 |
| IPI00298828 | 1      | 29/ 64 | R.TC[160.14]PKPDDLPF<br>STVVPLK.T                    | 3 | 1915.392 |
| IPI00298828 | 0.9377 | 26/ 88 | K.WSPELPVC[160.14]A<br>PIIC[160.14]PPPSIPTFA<br>T.L  | 3 | 2551.292 |
| IPI00298828 | 0.9582 | 35/ 92 | K.WSPELPVC[160.14]A<br>PIIC[160.14]PPPSIPTFA<br>TL.R | 3 | 2664.192 |
| IPI00298860 | 0.9971 | 16/ 24 | K.GGSFQLNELQGLK.S                                    | 2 | 1390.592 |
| IPI00298860 | 0.9618 | 20/ 36 | R.THYYAVAVVK.K                                       | 3 | 1151.992 |
| IPI00298860 | 0.994  | 14/ 18 | R.THYYAVAVVK.K                                       | 2 | 1149.992 |
| IPI00298860 | 1      | 22/ 26 | R.SVQWC[160.14]AVS<br>QPEATK.C                       | 2 | 1591.792 |
| IPI00298860 | 0.9974 | 19/ 22 | R.FFSASC[160.14]VPG<br>ADK.G                         | 2 | 1284.692 |
| IPI00298860 | 0.9998 | 22/ 34 | K.DVTVLQNTDGNNNEA<br>WAK.D                           | 2 | 1989.192 |
| IPI00298860 | 0.9999 | 25/ 52 | K.KGGSFQLNELQGLK.S                                   | 3 | 1519.492 |
| IPI00298860 | 0.9985 | 17/ 24 | K.KGGSFQLNELQGLK.S                                   | 2 | 1390.892 |
| IPI00298860 | 0.9972 | 25/ 32 | K.C[160.14]AFSSQEPYF<br>SYSGAFK.C                    | 2 | 1976.692 |
| IPI00298860 | 0.9978 | 34/ 76 | R.FFSASC[160.14]VPG<br>ADKGQFPNLC[160.14]R<br>.L     | 3 | 2260.192 |

|             |        |        |                                          |   |          |
|-------------|--------|--------|------------------------------------------|---|----------|
| IPI00298860 | 0.9999 | 26/ 32 | K.C[160.14]AFSSQEPYF<br>SYSGAFK.C        | 2 | 1975.592 |
| IPI00298860 | 0.9999 | 24/ 32 | K.C[160.14]AFSSQEPYF<br>SYSGAFK.C        | 2 | 1978.792 |
| IPI00298860 | 0.9969 | 25/ 32 | K.C[160.14]AFSSQEPYF<br>SYSGAFK.C        | 2 | 1976.692 |
| IPI00298860 | 0.9999 | 21/ 26 | R.DSPIQC[160.14]IQAI<br>AENR.A           | 2 | 1614.792 |
| IPI00298860 | 1      | 31/ 76 | R.ADAVTLDGGFIYEAGL<br>APYK.L             | 3 | 2072.692 |
| IPI00298860 | 0.9994 | 25/ 32 | K.C[160.14]AFSSQEPYF<br>SYSGAFK.C        | 2 | 1976.692 |
| IPI00298860 | 1      | 29/ 38 | R.ADAVTLDGGFIYEAGL<br>APYK.L             | 2 | 2070.892 |
| IPI00298860 | 1      | 29/ 38 | R.ADAVTLDGGFIYEAGL<br>APYK.L             | 2 | 2071.592 |
| IPI00298860 | 1      | 22/ 26 | R.SVQWC[160.14]AVS<br>QPEATK.C           | 2 | 1591.492 |
| IPI00298860 | 0.9963 | 19/ 22 | R.FFSASC[160.14]VPG<br>ADK.G             | 2 | 1285.692 |
| IPI00298860 | 0.9995 | 27/ 52 | K.KGGSFQLNELQGLK.S                       | 3 | 1519.492 |
| IPI00298860 | 0.999  | 17/ 24 | K.KGGSFQLNELQGLK.S                       | 2 | 1390.692 |
| IPI00298860 | 0.9999 | 27/ 32 | K.C[160.14]AFSSQEPYF<br>SYSGAFK.C        | 2 | 1975.392 |
| IPI00298860 | 0.9991 | 24/ 32 | K.C[160.14]AFSSQEPYF<br>SYSGAFK.C        | 2 | 1975.592 |
| IPI00298860 | 0.9998 | 27/ 38 | R.ADAVTLDGGFIYEAGL<br>APYK.L             | 2 | 2071.592 |
| IPI00298860 | 0.9968 | 19/ 32 | K.C[160.14]AFSSQEPYF<br>SYSGAFK.C        | 2 | 1976.892 |
| IPI00298860 | 1      | 27/ 38 | R.ADAVTLDGGFIYEAGL<br>APYK.L             | 2 | 2071.792 |
| IPI00298860 | 0.9997 | 21/ 38 | R.ADAVTLDGGFIYEAGL<br>APYK.L             | 2 | 2073.492 |
| IPI00298860 | 0.9994 | 16/ 24 | K.KGGSFQLNELQGLK.S<br>R.ADAVTLDGGFIYEAGL | 2 | 1390.592 |
| IPI00298860 | 0.9998 | 27/ 38 | APYK.L<br>R.ADAVTLDGGFIYEAGL             | 2 | 2070.992 |
| IPI00298860 | 0.999  | 26/ 38 | APYK.L                                   | 2 | 2070.892 |
| IPI00298860 | 0.9949 | 20/ 36 | R.THYYAVAVVK.K                           | 3 | 1151.792 |
| IPI00298860 | 0.9999 | 25/ 52 | K.KGGSFQLNELQGLK.S                       | 3 | 1519.792 |
| IPI00298860 | 0.9999 | 26/ 32 | K.C[160.14]AFSSQEPYF<br>SYSGAFK.C        | 2 | 1975.792 |
| IPI00298860 | 0.9992 | 26/ 38 | R.ADAVTLDGGFIYEAGL<br>APYK.L             | 2 | 2070.792 |
| IPI00298860 | 0.9961 | 15/ 18 | R.THYYAVAVVK.K                           | 2 | 1150.192 |

|             |        |        |                                             |   |          |
|-------------|--------|--------|---------------------------------------------|---|----------|
| IPI00298860 | 0.9985 | 22/ 26 | R.SVQWC[160.14]AVS<br>QPEATK.C              | 2 | 1589.892 |
| IPI00298860 | 0.9923 | 15/ 24 | K.GGSFQLNELQGLK.S<br>R.DSPIQC[160.14]IQAI   | 2 | 1391.592 |
| IPI00298860 | 0.9977 | 14/ 26 | AENR.A<br>K.C[160.14]AFSSQEPYF              | 2 | 1614.992 |
| IPI00298860 | 0.9998 | 21/ 32 | SYSGAFK.C<br>R.ADAVTLDGGFIYEAGL             | 2 | 1976.492 |
| IPI00298860 | 1      | 28/ 38 | APYK.L<br>K.C[160.14]AFSSQEPYF              | 2 | 2070.692 |
| IPI00298860 | 0.9967 | 16/ 32 | SYSGAFK.C<br>K.FDEYFSQSC[160.14]            | 2 | 1977.492 |
| IPI00298860 | 0.9997 | 23/ 30 | APGSDPR.S<br>R.C[160.14]LAENAGDV            | 2 | 1862.492 |
| IPI00298860 | 0.9454 | 21/ 24 | AFVK.D                                      | 2 | 1393.492 |
| IPI00298860 | 0.9993 | 24/ 28 | K.YLGPQYVAGITNLKK.C<br>R.VVWC[160.14]AVGE   | 2 | 1664.692 |
| IPI00298860 | 0.9999 | 18/ 22 | QELR.K                                      | 2 | 1445.592 |
| IPI00298860 | 0.9989 | 20/ 24 | L.GPQYVAGITNLKK.C<br>K.NLLFNDNTEC[160.14]   | 2 | 1388.892 |
| IPI00298860 | 1      | 21/ 24 | ]LAR.L<br>R.C[160.14]LAENAGDV               | 2 | 1579.592 |
| IPI00298860 | 0.9667 | 15/ 24 | AFVK.D<br>K.C[160.14]GLVPVLAE               | 2 | 1393.692 |
| IPI00298860 | 0.9998 | 19/ 22 | NYK.S                                       | 2 | 1363.492 |
| IPI00298860 | 0.9889 | 23/ 26 | K.YLGPQYVAGITNLK.K<br>K.SQQSSDPDPNC[160.14] | 2 | 1536.792 |
| IPI00298860 | 0.9996 | 40/100 | VDRPVEGYLAVAVVR<br>.R                       | 3 | 2859.992 |
| IPI00298860 | 1      | 19/ 22 | K.LADFALLC[160.14]LD<br>GK.R                | 2 | 1336.792 |
| IPI00298860 | 0.9998 | 26/ 36 | R.IDSGLYLGSGYFTAIQN<br>LR.K                 | 2 | 2088.192 |
| IPI00298860 | 0.9857 | 37/ 72 | R.IDSGLYLGSGYFTAIQN<br>LR.K                 | 3 | 2089.492 |
| IPI00298860 | 0.9999 | 20/ 24 | R.C[160.14]LAENAGDV<br>AFVK.D               | 2 | 1393.892 |
| IPI00298860 | 0.9983 | 19/ 22 | R.VVWC[160.14]AVGE<br>QELR.K                | 2 | 1445.592 |
| IPI00298860 | 0.9925 | 24/ 28 | K.YLGPQYVAGITNLKK.C<br>K.NLLFNDNTEC[160.14] | 2 | 1665.692 |
| IPI00298860 | 1      | 21/ 24 | ]LAR.L                                      | 2 | 1579.792 |
| IPI00298860 | 1      | 24/ 26 | K.YLGPQYVAGITNLK.K<br>K.LADFALLC[160.14]LD  | 2 | 1536.492 |
| IPI00298860 | 0.9995 | 19/ 22 | GK.R                                        | 2 | 1336.292 |

|             |        |        |                                            |   |          |
|-------------|--------|--------|--------------------------------------------|---|----------|
| IPI00298860 | 0.9966 | 35/ 72 | R.IDSGLYLGSYFTAIQN<br>LR.K                 | 3 | 2089.492 |
| IPI00298860 | 0.9997 | 25/ 36 | R.IDSGLYLGSYFTAIQN<br>LR.K                 | 2 | 2088.992 |
| IPI00298860 | 0.9997 | 18/ 22 | K.LADFALLC[160.14]LD<br>GK.R               | 2 | 1336.392 |
| IPI00298860 | 0.9992 | 17/ 22 | R.VVWC[160.14]AVGE<br>QELR.K               | 2 | 1445.292 |
| IPI00298860 | 0.9977 | 16/ 22 | K.C[160.14]GLVPVLAE<br>NYK.S               | 2 | 1363.692 |
| IPI00298860 | 0.9993 | 24/ 26 | K.YLGPQYVAGITNLK.K<br>K.LADFALLC[160.14]LD | 2 | 1538.092 |
| IPI00298860 | 0.9997 | 19/ 22 | GK.R<br>R.C[160.14]LAENAGDV                | 2 | 1335.792 |
| IPI00298860 | 0.9385 | 21/ 24 | AFVK.D<br>R.VVWC[160.14]AVGE               | 2 | 1392.792 |
| IPI00298860 | 0.9868 | 19/ 22 | QELR.K                                     | 2 | 1445.692 |
| IPI00298860 | 0.9998 | 24/ 28 | K.YLGPQYVAGITNLK.K<br>K.NLLFNDNTEC[160.14  | 2 | 1664.692 |
| IPI00298860 | 0.9999 | 21/ 24 | ]LAR.L<br>K.C[160.14]GLVPVLAE              | 2 | 1579.692 |
| IPI00298860 | 0.9982 | 18/ 22 | NYK.S                                      | 2 | 1362.492 |
| IPI00298860 | 0.9999 | 24/ 26 | K.YLGPQYVAGITNLK.K<br>R.IDSGLYLGSYFTAIQN   | 2 | 1538.892 |
| IPI00298860 | 0.9997 | 26/ 36 | LR.K<br>R.C[160.14]LAENAGDV                | 2 | 2088.792 |
| IPI00298860 | 0.9949 | 20/ 24 | AFVK.D                                     | 2 | 1393.092 |
| IPI00298860 | 0.9811 | 14/ 20 | K.FQLFGSPSGQK.D<br>R.VVWC[160.14]AVGE      | 2 | 1195.492 |
| IPI00298860 | 0.9347 | 18/ 22 | QELR.K                                     | 2 | 1445.992 |
| IPI00298860 | 0.9976 | 21/ 28 | K.YLGPQYVAGITNLK.K<br>K.NLLFNDNTEC[160.14  | 2 | 1665.792 |
| IPI00298860 | 0.9981 | 20/ 24 | ]LAR.L                                     | 2 | 1579.592 |
| IPI00298860 | 0.9987 | 23/ 26 | K.YLGPQYVAGITNLK.K<br>R.SIAQYWLGC[160.14]  | 2 | 1535.892 |
| IPI00298971 | 0.999  | 18/ 28 | PAPGHL.-<br>R.SIAQYWLGC[160.14]            | 2 | 1669.792 |
| IPI00298971 | 0.9999 | 20/ 28 | PAPGHL.-<br>R.ANVAVVSGAPLQGQLV             | 2 | 1669.592 |
| IPI00299086 | 1      | 25/ 34 | AR.P                                       | 2 | 1749.592 |
| IPI00299086 | 0.9408 | 15/ 20 | K.DSTGHVGFIFK.N<br>R.AIGGGLSSVGGGSSTI      | 2 | 1207.592 |
| IPI00299145 | 0.9953 | 26/ 32 | K.Y                                        | 2 | 1447.192 |

|             |        |        |                      |   |          |
|-------------|--------|--------|----------------------|---|----------|
|             |        |        | R.AIGGGLSSVGGGSSTI   |   |          |
| IPI00299145 | 0.9996 | 40/100 | KYTTTTSSSSR.K        | 3 | 2419.092 |
| IPI00299429 | 0.9092 | 9/ 10  | R.FNLVLR.N           | 2 | 761.392  |
| IPI00299547 | 0.9995 | 15/ 20 | K.SYPGLTSYLVR.V      | 2 | 1255.492 |
| IPI00299547 | 0.9888 | 15/ 16 | Y.PGLTSYLVR.V        | 2 | 1005.192 |
|             |        |        | R.TFVPGC[160.14]QPG  |   |          |
| IPI00299547 | 0.999  | 25/ 32 | EFTLGNIK.S           | 2 | 1865.292 |
|             |        |        | K.SLGLPENHIVFPVPIDQ  |   |          |
| IPI00299547 | 0.9992 | 23/ 40 | C[160.14]IDG.-       | 2 | 2319.792 |
|             |        |        | R.TFVPGC[160.14]QPG  |   |          |
| IPI00299547 | 0.9752 | 19/ 30 | EFTLGNI.K            | 2 | 1735.892 |
|             |        |        | R.TFVPGC[160.14]QPG  |   |          |
| IPI00299547 | 1      | 34/ 64 | EFTLGNIK.S           | 3 | 1866.692 |
|             |        |        | R.TFVPGC[160.14]QPG  |   |          |
| IPI00299547 | 0.9974 | 25/ 32 | EFTLGNIK.S           | 2 | 1865.692 |
|             |        |        | K.SLGLPENHIVFPVPIDQ  |   |          |
| IPI00299547 | 0.9997 | 22/ 40 | C[160.14]IDG.-       | 2 | 2321.592 |
|             |        |        | R.TFVPGC[160.14]QPG  |   |          |
| IPI00299547 | 0.9976 | 26/ 32 | EFTLGNIK.S           | 2 | 1864.692 |
|             |        |        | R.NPLFDHAALSAPLPAPS  |   |          |
| IPI00299699 | 0.9976 | 30/ 88 | SPPALP.-             | 3 | 2281.092 |
| IPI00300096 | 0.9566 | 16/ 20 | K.LLIIGDSGVGK.S      | 2 | 1071.292 |
|             |        |        | R.YADDTFTPAFVSTVGI   |   |          |
| IPI00300562 | 0.9999 | 23/ 36 | DFK.V                | 2 | 2094.992 |
|             |        |        | R.YADDTFTPAFVSTVGI   |   |          |
| IPI00300562 | 0.9957 | 21/ 36 | DFK.V                | 2 | 2094.292 |
|             |        |        | R.YADDTFTPAFVSTVGI   |   |          |
| IPI00300562 | 0.9458 | 29/ 36 | DFK.V                | 2 | 2094.892 |
| IPI00300725 | 0.9998 | 15/ 18 | R.SGFSSVSVSR.S       | 2 | 1012.592 |
|             |        |        | K.EVNVSPC[160.14]PT  |   |          |
| IPI00301579 | 0.9994 | 18/ 30 | QPC[160.14]QLSK.G    | 2 | 1843.792 |
|             |        |        | K.AVVHGILM[147.19]G  |   |          |
|             |        |        | VPVPFPIPEPDGC[160.1  |   |          |
| IPI00301579 | 0.9985 | 31/ 88 | 4]K.S                | 3 | 2444.892 |
|             |        |        | G.ILM[147.19]GVPVPFP |   |          |
| IPI00301579 | 0.9995 | 20/ 34 | IPEPDGC[160.14]K.S   | 2 | 1982.692 |
|             |        |        | G.ILM[147.19]GVPVPFP |   |          |
| IPI00301579 | 0.9821 | 27/ 68 | IPEPDGC[160.14]K.S   | 3 | 1983.292 |
| IPI00305457 | 0.9921 | 14/ 18 | K.LSITGTYDLK.S       | 2 | 1110.492 |
|             |        |        | K.VFSNGADLSGVTEEAP   |   |          |
| IPI00305457 | 0.9767 | 26/ 34 | LK.L                 | 2 | 1836.592 |
| IPI00305457 | 0.9998 | 16/ 18 | K.LSITGTYDLK.S       | 2 | 1110.792 |
| IPI00305457 | 0.9997 | 16/ 18 | K.SVLGQLGITK.V       | 2 | 1016.492 |
| IPI00305457 | 0.9991 | 17/ 18 | K.SVLGQLGITK.V       | 2 | 1015.192 |
|             |        |        | K.VFSNGADLSGVTEEAP   |   |          |
| IPI00305457 | 0.9874 | 23/ 34 | LK.L                 | 2 | 1834.892 |



|             |        |        |                                                              |   |          |
|-------------|--------|--------|--------------------------------------------------------------|---|----------|
| IPI00305457 | 0.9998 | 32/ 56 | K.FNKPVFVFLM[147.19]I<br>EQNTK.S                             | 3 | 1873.692 |
| IPI00305457 | 0.9984 | 34/ 76 | K.LSITGTYDLKSVLGQL<br>GITK.V                                 | 3 | 2108.692 |
| IPI00305457 | 0.9998 | 25/ 38 | K.LSITGTYDLKSVLGQL<br>GITK.V                                 | 2 | 2108.292 |
| IPI00305457 | 0.994  | 15/ 18 | K.LSITGTYDLK.S                                               | 2 | 1110.092 |
| IPI00305457 | 0.999  | 16/ 18 | K.SVLGQLGITK.V                                               | 2 | 1015.292 |
| IPI00305457 | 0.9998 | 14/ 18 | K.LSITGTYDLK.S                                               | 2 | 1109.992 |
| IPI00305457 | 0.998  | 16/ 18 | K.SVLGQLGITK.V                                               | 2 | 1015.492 |
| IPI00305457 | 1      | 25/ 34 | K.VFSNGADLSGVTEEAP<br>LK.L                                   | 2 | 1834.592 |
| IPI00305457 | 0.9556 | 26/ 76 | K.LSITGTYDLKSVLGQL<br>GITK.V                                 | 3 | 2107.492 |
| IPI00305457 | 0.9975 | 25/ 38 | K.LSITGTYDLKSVLGQL<br>GITK.V                                 | 2 | 2106.492 |
| IPI00305457 | 0.9904 | 13/ 18 | K.LSITGTYDLK.S                                               | 2 | 1110.192 |
| IPI00305457 | 0.9994 | 17/ 18 | K.SVLGQLGITK.V                                               | 2 | 1016.792 |
| IPI00305461 | 1      | 22/ 36 | K.VVNNSPQPQNVVFDV<br>QIPK.G                                  | 2 | 2123.492 |
| IPI00305461 | 0.9999 | 33/ 72 | K.VVNNSPQPQNVVFDV<br>QIPK.G                                  | 3 | 2123.192 |
| IPI00306543 | 0.997  | 16/ 28 | R.EVQVTM[147.19]C[1<br>60.14]IGAC[160.14]PS<br>QF.R          | 2 | 1742.792 |
| IPI00306543 | 0.9997 | 20/ 30 | K.TDTGVSLQTYDDLAK<br>.D                                      | 2 | 1739.992 |
| IPI00306543 | 0.9998 | 23/ 30 | R.EVQVTM[147.19]C[1<br>60.14]IGAC[160.14]PS<br>QFR.A         | 2 | 1899.492 |
| IPI00306543 | 0.9869 | 19/ 28 | R.EVQVTM[147.19]C[1<br>60.14]IGAC[160.14]PS<br>QF.R          | 2 | 1742.292 |
| IPI00306543 | 0.9983 | 36/ 92 | R.LKPDTVPAPC[160.14]<br>C[160.14]VPASYNPM[1<br>47.19]VLIQK.T | 3 | 2715.392 |
| IPI00306543 | 0.9999 | 24/ 30 | K.TDTGVSLQTYDDLAK<br>.D                                      | 2 | 1739.692 |
| IPI00306543 | 1      | 33/ 92 | R.LKPDTVPAPC[160.14]<br>C[160.14]VPASYNPMVL<br>IQK.T         | 3 | 2700.092 |
| IPI00328493 | 1      | 22/ 26 | S.SVTAADTAVYYC[160.<br>14]AR.D                               | 2 | 1548.592 |
| IPI00328493 | 0.9913 | 21/ 30 | K.LSSVTAADTAVYYC[16<br>0.14]AR.D                             | 2 | 1747.392 |
| IPI00328493 | 0.9926 | 23/ 30 | K.LSSVTAADTAVYYC[16<br>0.14]AR.D                             | 2 | 1748.692 |
| IPI00328493 | 1      | 22/ 26 | S.SVTAADTAVYYC[160.<br>14]AR.D                               | 2 | 1547.692 |

|             |        |          |                                                        |   |          |
|-------------|--------|----------|--------------------------------------------------------|---|----------|
| IPI00328493 | 0.9808 | 25/ 60   | K.LSSVTAADTAVYYC[16<br>0.14]AR.D                       | 3 | 1748.092 |
|             |        |          | -                                                      |   |          |
| IPI00382436 | 0.9997 | 27/ 34   | .SELTQDPAVSVALGQTV<br>R.I                              | 2 | 1870.792 |
|             |        |          | -                                                      |   |          |
| IPI00382436 | 0.9999 | 35/ 68   | .SELTQDPAVSVALGQTV<br>R.I                              | 3 | 1871.992 |
|             |        |          | -                                                      |   |          |
| IPI00382436 | 0.9987 | 26/ 34   | .SELTQDPAVSVALGQTV<br>R.I                              | 2 | 1870.192 |
|             |        |          | -                                                      |   |          |
| IPI00382478 | 0.9842 | 22/ 34   | .EVQLLESGGGLVQPGGS<br>L.R                              | 2 | 1740.692 |
| IPI00382480 | 0.9019 | 25/ 30   | Q.LVESGGGLVQPGGSLR<br>.L                               | 2 | 1525.692 |
|             |        |          | -                                                      |   |          |
| IPI00382480 | 0.9766 | 33/ 72   | .EVQLVESGGGLVQPGG<br>SLR.L                             | 3 | 1882.992 |
| IPI00382606 |        | 1 23/ 26 | K.FNWWYVDGVEVHNAK.<br>T                                | 2 | 1677.792 |
| IPI00382606 | 0.9786 | 23/ 52   | K.FNWWYVDGVEVHNAK.<br>T                                | 3 | 1679.092 |
| IPI00382606 | 0.9995 | 22/ 26   | K.FNWWYVDGVEVHNAK.<br>T                                | 2 | 1678.492 |
| IPI00382606 | 0.9612 | 21/ 52   | K.FNWWYVDGVEVHNAK.<br>T                                | 3 | 1679.092 |
| IPI00382606 | 0.9998 | 21/ 26   | K.FNWWYVDGVEVHNAK.<br>T                                | 2 | 1677.992 |
| IPI00382606 | 0.999  | 21/ 32   | K.TTPPVLDSDGSFFLYSK<br>.L                              | 2 | 1873.792 |
| IPI00382606 | 0.9995 | 20/ 32   | K.TTPPVLDSDGSFFLYSK<br>.L                              | 2 | 1873.892 |
| IPI00382606 | 0.9934 | 25/ 64   | K.TTPPVLDSDGSFFLYSK<br>.L                              | 3 | 1874.792 |
| IPI00382606 | 0.999  | 20/ 32   | K.TTPPVLDSDGSFFLYSK<br>.L                              | 2 | 1874.492 |
| IPI00382606 | 0.9978 | 30/ 64   | K.TTPPVLDSDGSFFLYSK<br>.L                              | 3 | 1875.892 |
| IPI00382606 | 0.9571 | 21/ 32   | K.TTPPVLDSDGSFFLYSK<br>.L                              | 2 | 1873.592 |
| IPI00382606 |        | 1 38/100 | K.THTC[160.14]PPC[16<br>0.14]PAPELLGGPSVFLF<br>PPKPK.D | 3 | 2846.792 |
| IPI00382606 | 0.9997 | 22/ 36   | K.THTC[160.14]PPC[16<br>0.14]PAPELLGGPSVFL             | 2 | 2037.692 |
| IPI00382606 | 0.9684 | 23/ 28   | T.PPVLDSDGSFFLYSK.L                                    | 2 | 1672.792 |

|             |        |        |                                                                                                                            |   |          |
|-------------|--------|--------|----------------------------------------------------------------------------------------------------------------------------|---|----------|
| IPI00382606 | 1      | 33/ 64 | K.TTPPVLDSDGSFFLYSK<br>.L                                                                                                  | 3 | 1874.692 |
| IPI00382606 | 0.9955 | 22/ 32 | K.TTPPVLDSDGSFFLYSK<br>.L                                                                                                  | 2 | 1874.792 |
| IPI00382606 | 0.9999 | 25/ 32 | K.TTPPVLDSDGSFFLYSK<br>.L                                                                                                  | 2 | 1874.292 |
| IPI00382606 | 0.9781 | 16/ 32 | K.TTPPVLDSDGSFFLYSK<br>.L                                                                                                  | 2 | 1873.492 |
| IPI00382606 | 0.992  | 38/100 | K.THTC[160.14]PPC[16<br>0.14]PAPELLGGPSVFLF<br>PPKPK.D                                                                     | 3 | 2845.592 |
| IPI00382606 | 0.974  | 13/ 32 | K.TTPPVLDSDGSFFLYSK<br>.L                                                                                                  | 2 | 1874.192 |
| IPI00382606 | 0.9997 | 21/ 32 | K.TTPPVLDSDGSFFLYSK<br>.L                                                                                                  | 2 | 1872.992 |
| IPI00382606 | 0.9937 | 22/ 32 | K.TTPPVLDSDGSFFLYSK<br>.L                                                                                                  | 2 | 1873.892 |
| IPI00382606 | 0.9879 | 24/ 64 | K.THTC[160.14]PPC[16<br>0.14]PAPELL.G                                                                                      | 3 | 1874.992 |
| IPI00382606 | 0.9966 | 21/ 24 | K.THTC[160.14]PPC[16<br>0.14]PAPELL.G                                                                                      | 2 | 1492.392 |
| IPI00382606 | 0.9997 | 22/ 36 | K.THTC[160.14]PPC[16<br>0.14]PAPELLGGPSVF.L                                                                                | 2 | 2038.192 |
| IPI00382606 | 0.9823 | 20/ 28 | T.PPVLDSDGSFFLYSK.L<br>K.TTPPVLDSDGSFFLYSK                                                                                 | 2 | 1673.092 |
| IPI00382606 | 0.9561 | 23/ 32 | .L                                                                                                                         | 2 | 1875.892 |
| IPI00382606 | 0.9995 | 23/ 28 | T.PPVLDSDGSFFLYSK.L<br>K.TTPPVLDSDGSFFLYSK                                                                                 | 2 | 1671.392 |
| IPI00382606 | 0.9924 | 24/ 32 | .L<br>K.TTPPVLDSDGSFFLYSK                                                                                                  | 2 | 1875.792 |
| IPI00382606 | 0.9689 | 24/ 32 | .L<br>K.TTPPVLDSDGSFFLYSK                                                                                                  | 2 | 1872.592 |
| IPI00382606 | 0.9982 | 22/ 32 | .L<br>K.TTPPVLDSDGSFFLYSK                                                                                                  | 2 | 1873.992 |
| IPI00382606 | 0.9915 | 18/ 32 | .L                                                                                                                         | 2 | 1873.492 |
| IPI00382606 | 0.9999 | 42/116 | K.SC[160.14]DKTHTC[<br>160.14]PPC[160.14]PA<br>PELLGGPSVFLFPPKPK.D<br>K.THTC[160.14]PPC[16<br>0.14]PAPELLGGPSVFLF<br>PPK.P | 3 | 3338.192 |
| IPI00382606 | 0.9976 | 34/ 92 | K.THTC[160.14]PPC[16<br>0.14]PAPELLGGPSVFLF<br>PPKPK.D                                                                     | 3 | 2622.492 |
| IPI00382606 | 0.9213 | 36/100 | PPKPK.D                                                                                                                    | 3 | 2845.292 |

|             |        |        |                                                          |   |          |
|-------------|--------|--------|----------------------------------------------------------|---|----------|
| IPI00382606 | 0.9675 | 38/100 | K.THTC[160.14]PPC[160.14]PAPELLGGPSVFLF<br>PPKPK.D       | 3 | 2846.292 |
| IPI00382606 | 0.9999 | 38/100 | K.THTC[160.14]PPC[160.14]PAPELLGGPSVFLF<br>PPKPK.D       | 3 | 2844.592 |
| IPI00382606 | 0.996  | 39/100 | K.THTC[160.14]PPC[160.14]PAPELLGGPSVFLF<br>PPKPK.D       | 3 | 2845.892 |
| IPI00382606 | 0.9132 | 27/ 88 | T.C[160.14]PPC[160.14]<br>]PAPELLGGPSVFLFPPKPK.D         | 3 | 2507.392 |
| IPI00382606 | 0.9973 | 39/100 | K.THTC[160.14]PPC[160.14]PAPELLGGPSVFLF<br>PPKPK.D       | 3 | 2847.292 |
| IPI00382606 | 0.9998 | 20/ 32 | K.TTPPVLDSDGSFFLYSK<br>.L                                | 2 | 1875.292 |
| IPI00382606 | 0.9987 | 22/ 28 | T.PPVLDSDGSFFLYSK.L<br>K.TTPPVLDSDGSFFLYSK               | 2 | 1671.192 |
| IPI00382606 | 0.9997 | 26/ 32 | .L<br>K.THTC[160.14]PPC[160.14]PAPELLGGPSVFLF<br>PPKPK.D | 2 | 1874.292 |
| IPI00382606 | 0.9924 | 36/100 | K.THTC[160.14]PPC[160.14]PAPELLGGPSVFLF<br>PPKPK.D       | 3 | 2846.692 |
| IPI00382606 | 0.9989 | 40/100 | K.THTC[160.14]PPC[160.14]PAPELLGGPSVFLF<br>PPKPK.D       | 3 | 2846.292 |
| IPI00382606 | 0.9993 | 25/100 | K.THTC[160.14]PPC[160.14]PAPELLGGPSVFLF<br>PPKPK.D       | 3 | 2845.092 |
| IPI00382606 | 0.9943 | 13/ 32 | K.TTPPVLDSDGSFFLYSK<br>.L                                | 2 | 1874.992 |
| IPI00382990 | 0.9757 | 12/ 16 | R.EFLGNFDTK.L                                            | 2 | 1072.392 |
| IPI00383071 | 0.9998 | 21/ 28 | K.VVLAYEPVWAIGTGK.T                                      | 2 | 1602.792 |
| IPI00383071 | 0.9797 | 22/ 28 | K.VVLAYEPVWAIGTGK.T                                      | 2 | 1603.692 |
| IPI00383071 | 0.9992 | 20/ 28 | K.VVLAYEPVWAIGTGK.T                                      | 2 | 1603.892 |
| IPI00383071 | 1      | 22/ 28 | K.VVLAYEPVWAIGTGK.T                                      | 2 | 1603.092 |
| IPI00383071 | 1      | 23/ 28 | K.VVLAYEPVWAIGTGK.T                                      | 2 | 1603.592 |
| IPI00383071 | 0.9987 | 18/ 30 | K.VTNGAFTGEISPGM[1<br>47.19]IK.D                         | 2 | 1637.992 |
| IPI00383732 | 0.9961 | 14/ 22 | K.GPSVFPLAPSSK.S                                         | 2 | 1186.492 |
| IPI00383732 | 0.9946 | 14/ 22 | K.GPSVFPLAPSSK.S                                         | 2 | 1186.192 |
| IPI00383732 | 0.994  | 14/ 22 | K.GPSVFPLAPSSK.S                                         | 1 | 1185.592 |
| IPI00383732 | 0.9983 | 15/ 22 | K.GPSVFPLAPSSK.S                                         | 2 | 1186.092 |

|             |        |        |                       |   |          |
|-------------|--------|--------|-----------------------|---|----------|
| IPI00383732 | 0.9927 | 14/ 22 | K.GPSVFPLAPSSK.S      | 2 | 1186.092 |
| IPI00383732 | 0.9901 | 15/ 22 | K.GPSVFPLAPSSK.S      | 2 | 1186.992 |
| IPI00383732 | 0.9932 | 14/ 22 | K.GPSVFPLAPSSK.S      | 1 | 1185.692 |
| IPI00383732 | 0.9678 | 15/ 22 | K.GPSVFPLAPSSK.S      | 2 | 1185.292 |
| IPI00383732 | 0.9794 | 16/ 22 | K.GPSVFPLAPSSK.S      | 2 | 1189.092 |
| IPI00383732 | 0.9943 | 13/ 22 | K.GPSVFPLAPSSK.S      | 1 | 1185.792 |
|             |        |        | R.APSTYGGGLSVSSSR.    |   |          |
| IPI00384444 | 0.9999 | 20/ 28 | F                     | 2 | 1424.992 |
|             |        |        | R.APSTYGGGLSVSSSR.    |   |          |
| IPI00384444 | 0.9999 | 18/ 28 | F                     | 2 | 1425.292 |
|             |        |        | R.DASGATFTWTPSSGK.    |   |          |
| IPI00384952 | 0.9568 | 18/ 28 | S                     | 2 | 1511.592 |
|             |        |        | R.DASGATFTWTPSSGK.    |   |          |
| IPI00384952 | 0.9998 | 17/ 28 | S                     | 2 | 1512.492 |
|             |        |        | R.DASGATFTWTPSSGK.    |   |          |
| IPI00384952 | 0.9998 | 19/ 28 | S                     | 2 | 1512.392 |
|             |        |        |                       |   |          |
| IPI00385264 | 0.9997 | 28/ 56 | R.VFAIPPSFASIFLTK.S   | 3 | 1638.592 |
|             |        |        |                       |   |          |
| IPI00385264 | 0.997  | 22/ 28 | R.VFAIPPSFASIFLTK.S   | 2 | 1638.692 |
|             |        |        | R.FTC[160.14]TVTHTDL  |   |          |
| IPI00385264 | 0.9922 | 26/ 56 | PSPLK.Q               | 3 | 1718.992 |
|             |        |        | R.FTC[160.14]TVTHTDL  |   |          |
| IPI00385264 | 0.9987 | 20/ 28 | PSPLK.Q               | 2 | 1716.792 |
|             |        |        | T.C[160.14]TVTHTDLPS  |   |          |
| IPI00385264 | 0.9892 | 20/ 24 | PLK.Q                 | 2 | 1468.692 |
|             |        |        |                       |   |          |
| IPI00385264 | 0.9999 | 24/ 28 | R.VFAIPPSFASIFLTK.S   | 2 | 1638.592 |
|             |        |        |                       |   |          |
| IPI00385264 | 0.9997 | 32/ 56 | R.VFAIPPSFASIFLTK.S   | 3 | 1638.892 |
| IPI00385264 | 0.9968 | 18/ 20 | I.PPSFASIFLTK.S       | 2 | 1208.092 |
|             |        |        |                       |   |          |
| IPI00385264 | 0.9961 | 19/ 28 | R.VFAIPPSFASIFLTK.S   | 2 | 1637.792 |
|             |        |        | G.EIVLTQSPATLSLSPGE   |   |          |
| IPI00387117 | 0.9779 | 21/ 34 | R.A                   | 2 | 1897.692 |
|             |        |        | G.EIVLTQSPATLSLSPGE   |   |          |
| IPI00387117 | 1      | 22/ 34 | R.A                   | 2 | 1898.692 |
|             |        |        | G.EIVLTQSPATLSLSPGE   |   |          |
| IPI00387117 | 0.9997 | 22/ 34 | R.A                   | 2 | 1898.592 |
|             |        |        | R.LS[167.08]S[167.08] |   |          |
|             |        |        | GFGGGGGGGSGGGGG       |   |          |
| IPI00395663 | 0.9402 | 21/ 36 | G.S                   | 2 | 1498.892 |
| IPI00396434 | 0.961  | 11/ 12 | K.HEQVYIR.S           | 2 | 943.592  |
|             |        |        | R.LFEDTNLC[160.14]AI  |   |          |
| IPI00398107 | 0.9501 | 19/ 22 | HA.R                  | 2 | 1403.592 |
|             |        |        | K.C[160.14]C[160.14]V |   |          |
|             |        |        | EC[160.14]PPC[160.14  |   |          |
|             |        |        | ]PAPPVAGPSVFLFPPKPK   |   |          |
| IPI00399007 | 0.9968 | 29/100 | .D                    | 3 | 2909.092 |

|             |        |        |                                                                                                    |   |          |
|-------------|--------|--------|----------------------------------------------------------------------------------------------------|---|----------|
| IPI00399007 | 0.9589 | 13/ 50 | K.C[160.14]C[160.14]V<br>EC[160.14]PPC[160.14<br>]PAPPVAGPSVFLFPPKPK<br>.D                         | 2 | 2908.092 |
| IPI00399007 | 0.9904 | 31/100 | K.C[160.14]C[160.14]V<br>EC[160.14]PPC[160.14<br>]PAPPVAGPSVFLFPPKPK<br>.D                         | 3 | 2909.492 |
| IPI00399007 | 0.9229 | 33/100 | K.C[160.14]C[160.14]V<br>EC[160.14]PPC[160.14<br>]PAPPVAGPSVFLFPPKPK<br>.D                         | 3 | 2909.892 |
| IPI00399007 | 0.9959 | 28/100 | K.C[160.14]C[160.14]V<br>EC[160.14]PPC[160.14<br>]PAPPVAGPSVFLFPPKPK<br>.D                         | 3 | 2909.892 |
| IPI00399007 | 0.981  | 33/100 | K.C[160.14]C[160.14]V<br>EC[160.14]PPC[160.14<br>]PAPPVAGPSVFLFPPKPK<br>.D                         | 3 | 2909.092 |
| IPI00399007 | 0.9927 | 19/ 30 | A.PPVAGPSVFLFPPKPK.<br>D                                                                           | 2 | 1679.392 |
| IPI00399007 | 0.9982 | 34/100 | K.C[160.14]C[160.14]V<br>EC[160.14]PPC[160.14<br>]PAPPVAGPSVFLFPPKPK<br>.D                         | 3 | 2909.592 |
| IPI00399007 | 0.9943 | 31/100 | K.C[160.14]C[160.14]V<br>EC[160.14]PPC[160.14<br>]PAPPVAGPSVFLFPPKPK<br>.D                         | 3 | 2909.192 |
| IPI00399007 | 0.9509 | 12/ 28 | P.PVAGPSVFLFPPKPK.D<br>R.KC[160.14]C[160.14]<br>VEC[160.14]PPC[160.1<br>4]PAPPVAGPSVFLFPPKP<br>K.D | 2 | 1580.492 |
| IPI00399007 | 0.9998 | 43/104 | K.C[160.14]C[160.14]V<br>EC[160.14]PPC[160.14<br>]PAPPVAGPSVFLFPPKPK<br>.D                         | 3 | 3037.092 |
| IPI00399007 | 0.9998 | 36/100 | K.C[160.14]C[160.14]V<br>EC[160.14]PPC[160.14<br>]PAPPVAGPSVFLFPPKPK<br>.D                         | 3 | 2909.492 |
| IPI00399007 | 0.9999 | 41/100 | K.C[160.14]C[160.14]V<br>EC[160.14]PPC[160.14<br>]PAPPVAGPSVFLFPPKPK<br>.D                         | 3 | 2909.492 |
| IPI00399007 | 0.9831 | 14/ 50 | K.C[160.14]C[160.14]V<br>EC[160.14]PPC[160.14<br>]PAPPVAGPSVFLFPPKPK<br>.D                         | 2 | 2908.092 |

|             |        |        |                                                                                                    |   |          |
|-------------|--------|--------|----------------------------------------------------------------------------------------------------|---|----------|
| IPI00399007 | 0.9988 | 26/ 40 | C.PPC[160.14]PAPPVAG<br>PSVFLFPPKPK.D                                                              | 2 | 2200.092 |
| IPI00399007 | 0.9998 | 35/ 80 | C.PPC[160.14]PAPPVAG<br>PSVFLFPPKPK.D                                                              | 3 | 2200.992 |
| IPI00399007 | 0.9541 | 28/100 | K.C[160.14]C[160.14]V<br>EC[160.14]PPC[160.14]<br>]PAPPVAGPSVFLFPPKPK<br>.D                        | 3 | 2908.292 |
| IPI00399007 | 0.954  | 14/ 28 | P.PVAGPSVFLFPPKPK.D<br>K.C[160.14]C[160.14]V<br>EC[160.14]PPC[160.14]<br>]PAPPVAGPSVFLFPPKPK<br>.D | 2 | 1580.592 |
| IPI00399007 | 0.9971 | 35/100 | K.C[160.14]C[160.14]V<br>EC[160.14]PPC[160.14]<br>]PAPPVAGPSVFLFPPKPK<br>.D                        | 3 | 2908.692 |
| IPI00399007 | 0.9939 | 15/ 50 | K.C[160.14]C[160.14]V<br>EC[160.14]PPC[160.14]<br>]PAPPVAGPSVFLFPPKPK<br>.D                        | 2 | 2908.292 |
| IPI00399007 | 0.9997 | 39/100 | A.PPVAGPSVFLFPPKPK.<br>.D                                                                          | 3 | 2910.192 |
| IPI00399007 | 0.9997 | 23/ 30 | D                                                                                                  | 2 | 1679.492 |
| IPI00399007 | 0.9992 | 25/ 40 | C.PPC[160.14]PAPPVAG<br>PSVFLFPPKPK.D                                                              | 2 | 2200.192 |
| IPI00399007 | 1      | 41/ 80 | C.PPC[160.14]PAPPVAG<br>PSVFLFPPKPK.D                                                              | 3 | 2201.992 |
| IPI00399007 | 0.9998 | 28/100 | K.C[160.14]C[160.14]V<br>EC[160.14]PPC[160.14]<br>]PAPPVAGPSVFLFPPKPK<br>.D                        | 3 | 2911.092 |
| IPI00399007 | 0.9366 | 33/ 80 | C.PPC[160.14]PAPPVAG<br>PSVFLFPPKPK.D                                                              | 3 | 2199.892 |
| IPI00399007 | 0.9999 | 18/ 26 | R.STSESTAALGC[160.1<br>4]LVK.D                                                                     | 2 | 1423.592 |
| IPI00399007 | 0.9998 | 21/ 26 | R.STSESTAALGC[160.1<br>4]LVK.D                                                                     | 2 | 1424.792 |
| IPI00399007 | 0.9801 | 15/ 26 | R.STSESTAALGC[160.1<br>4]LVK.D                                                                     | 2 | 1424.192 |
| IPI00399007 | 0.9977 | 21/ 26 | R.STSESTAALGC[160.1<br>4]LVK.D                                                                     | 2 | 1424.892 |
| IPI00399007 | 0.9656 | 13/ 26 | R.STSESTAALGC[160.1<br>4]LVK.D                                                                     | 1 | 1422.792 |
| IPI00399007 | 0.9839 | 23/ 52 | R.STSESTAALGC[160.1<br>4]LVK.D                                                                     | 3 | 1424.892 |
| IPI00401776 | 0.9917 | 24/ 44 | K.VYHLPYYEAC[160.14]<br>VR.D                                                                       | 3 | 1570.592 |

|             |        |          |                                                            |   |          |
|-------------|--------|----------|------------------------------------------------------------|---|----------|
| IPI00401776 | 0.9985 | 38/ 84   | K.FGAAC[160.14]APTC[160.14]QM[147.19]LATGVAC[160.14]VPTK.C | 3 | 2328.192 |
| IPI00401776 | 0.9954 | 16/ 20   | K.VYHLPYYEAC[160.14]V.R                                    | 2 | 1413.592 |
| IPI00401776 | 0.9997 | 23/ 34   | K.LDDPGEIC[160.14]TFQDIPSTHV.R                             | 2 | 2043.692 |
| IPI00401776 |        | 1 24/ 32 | R.IC[160.14]TQLLTLVAPEC[160.14]SVSK.E                      | 2 | 1919.892 |
| IPI00401776 | 0.9995 | 31/ 64   | R.IC[160.14]TQLLTLVAPEC[160.14]SVSK.E                      | 3 | 1920.192 |
| IPI00401776 | 0.9998 | 25/ 38   | K.ESPLC[160.14]GDVSFVTDPC[160.14]SLNAF.R                   | 2 | 2214.692 |
| IPI00401776 | 0.9907 | 21/ 34   | K.DIGVISLPYTSNGLQITP.F                                     | 2 | 1888.792 |
| IPI00401776 | 0.9998 | 25/ 44   | K.DIGVISLPYTSNGLQITPFGQSV.R                                | 2 | 2407.092 |
| IPI00401776 | 0.9384 | 15/ 18   | K.DAFPTFSVQL.R                                             | 2 | 1125.092 |
| IPI00401776 |        | 1 25/ 44 | K.DIGVISLPYTSNGLQITPFGQSV.R                                | 2 | 2407.392 |
| IPI00401776 | 0.9984 | 35/ 88   | K.DIGVISLPYTSNGLQITPFGQSV.R                                | 3 | 2408.392 |
| IPI00401776 | 0.991  | 17/ 22   | R.C[160.14]HATVNPAPFYK.R                                   | 2 | 1403.792 |
| IPI00401776 | 0.9994 | 40/ 96   | R.ATEC[160.14]HHSAPVDGC[160.14]NC[160.14]PDGTYLNQK.G       | 3 | 2832.092 |
| IPI00401776 | 0.9995 | 16/ 20   | K.AQC[160.14]PC[160.14]ILEGYK.F                            | 2 | 1339.492 |
| IPI00401776 | 0.9723 | 29/ 96   | R.ATEC[160.14]HHSAPVDGC[160.14]NC[160.14]PDGTYLNQK.G       | 3 | 2830.592 |
| IPI00410714 | 0.9603 | 12/ 14   | E.YGAEALER.M                                               | 2 | 907.792  |
| IPI00410714 | 0.9957 | 19/ 22   | A.HAGEYGAEALER.M                                           | 2 | 1302.592 |
| IPI00410714 | 0.9879 | 18/ 20   | K.VADALTNAVAH.V                                            | 2 | 1083.392 |
| IPI00410714 | 0.9614 | 25/ 52   | V.GAHAGEYGAEALER.M                                         | 3 | 1431.292 |
| IPI00410714 | 0.9532 | 34/ 60   | G.KVGAHAGEYGAEALER.M                                       | 3 | 1658.292 |
| IPI00410714 | 0.9999 | 23/ 28   | K.VGAHAGEYGAEALER.M                                        | 2 | 1529.392 |
| IPI00410714 | 0.9982 | 33/ 64   | W.GKVGHAHAGEYGAEALER.M                                     | 3 | 1715.392 |



|             |        |          |                                     |   |          |
|-------------|--------|----------|-------------------------------------|---|----------|
| IPI00410714 | 0.9733 | 22/ 26   | V.GAHAGEYGAEALER.M                  | 2 | 1430.192 |
| IPI00410714 | 0.9989 | 18/ 20   | H.AGEYGAEALER.M                     | 2 | 1164.992 |
| IPI00410714 |        | 1 19/ 28 | K.VGAHAGEYGAEALER.<br>M             | 1 | 1529.692 |
| IPI00410714 | 0.9999 | 29/ 56   | K.VGAHAGEYGAEALER.<br>M             | 3 | 1530.192 |
| IPI00410714 | 0.9998 | 30/ 56   | M                                   | 3 | 1529.292 |
| IPI00410714 | 0.902  | 17/ 24   | G.AHAGEYGAEALER.M                   | 2 | 1374.992 |
| IPI00410714 | 0.9966 | 28/ 56   | K.VGAHAGEYGAEALER.<br>M             | 3 | 1531.692 |
| IPI00410714 | 0.9901 | 19/ 20   | K.VADALTNAVAH.V                     | 2 | 1080.992 |
| IPI00410714 | 0.9977 | 29/ 56   | K.VGAHAGEYGAEALER.<br>M             | 3 | 1529.892 |
| IPI00410714 | 0.9963 | 25/ 52   | L.PAEFTPAVHASLDK.F                  | 3 | 1482.392 |
| IPI00410714 | 0.9256 | 23/ 28   | K.VGAHAGEYGAEALER.<br>M             | 2 | 1530.392 |
| IPI00410714 |        | 1 21/ 24 | K.VADALTNAVAHV.D                    | 2 | 1296.192 |
| IPI00410714 | 0.9997 | 37/ 76   | K.AAWGKVGGAHAGEYGA<br>EALER.M       | 3 | 2042.792 |
| IPI00410714 | 0.9888 | 17/ 20   | F.LASVSTVLTSK.Y                     | 2 | 1106.392 |
| IPI00410714 | 0.9999 | 30/ 60   | A.HLPAEFTPAVHASLDK.<br>F            | 3 | 1733.092 |
| IPI00410714 | 0.9989 | 23/ 28   | K.VGAHAGEYGAEALER.<br>M             | 2 | 1528.292 |
| IPI00410714 | 0.9927 | 21/ 24   | K.VADALTNAVAHV.D                    | 2 | 1294.692 |
| IPI00410714 | 0.9995 | 21/ 24   | K.VADALTNAVAHV.D                    | 2 | 1297.792 |
| IPI00410714 | 0.9987 | 27/ 56   | H.LPAEFTPAVHASLDK.F                 | 3 | 1596.292 |
| IPI00410714 | 0.9982 | 26/ 44   | P.HFDLSHGSAQVK.G                    | 3 | 1325.792 |
| IPI00410714 | 0.9904 | 25/ 60   | K.TYFPHFDLSHGSAQVK<br>.G            | 3 | 1833.792 |
| IPI00410714 | 0.9999 | 24/ 30   | K.TYFPHFDLSHGSAQVK<br>.G            | 2 | 1834.492 |
| IPI00410714 | 0.9948 | 19/ 22   | P.HFDLSHGSAQVK.G                    | 2 | 1325.292 |
| IPI00410714 | 0.9935 | 18/ 24   | F.PHFDLSHGSAQVK.G                   | 2 | 1422.792 |
| IPI00410714 | 0.9826 | 17/ 20   | H.FDLSHGSAQVK.G                     | 2 | 1189.292 |
| IPI00410714 | 0.9983 | 25/ 48   | F.PHFDLSHGSAQVK.G                   | 3 | 1422.892 |
| IPI00410714 | 0.9367 | 22/ 56   | T.YFPHFDLSHGSAQVK.<br>G             | 3 | 1733.092 |
| IPI00410714 | 0.9992 | 21/ 26   | K.VADALTNAVAHVDD.M                  | 2 | 1410.392 |
| IPI00410714 | 0.9942 | 28/ 60   | K.TYFPHFDLSHGSAQVK<br>.G            | 3 | 1834.992 |
| IPI00410714 | 0.9998 | 20/ 36   | K.VADALTNAVAHVDDM[<br>147.19]PNAL.S | 2 | 1954.192 |
| IPI00410714 | 0.9989 | 20/ 22   | K.FLASVSTVLTSK.Y                    | 2 | 1252.392 |

|             |        |          |                                                   |   |          |
|-------------|--------|----------|---------------------------------------------------|---|----------|
| IPI00410714 | 0.9977 | 23/ 32   | K.VADALTNAVAHVDDM[<br>147.19]PN.A                 | 2 | 1769.392 |
| IPI00410714 |        | 1 19/ 30 | K.TYFPHFDLSHGSAQVK<br>.G                          | 1 | 1832.692 |
| IPI00410714 |        | 1 20/ 26 | K.TYFPHFDLSHGSAQ.V<br>R.M[147.19]FLSFPTTK.        | 2 | 1606.192 |
| IPI00410714 | 0.9833 | 14/ 16   | T                                                 | 2 | 1087.192 |
| IPI00410714 | 0.9981 | 23/ 32   | K.VADALTNAVAHVDDM[<br>147.19]PN.A                 | 2 | 1769.492 |
| IPI00410714 | 0.9913 | 25/ 60   | K.TYFPHFDLSHGSAQVK<br>.G                          | 3 | 1834.092 |
| IPI00410714 | 0.9618 | 24/ 60   | K.TYFPHFDLSHGSAQVK<br>.G                          | 3 | 1834.392 |
| IPI00410714 | 0.9999 | 19/ 22   | K.FLASVSTVLTSK.Y                                  | 2 | 1251.892 |
| IPI00410714 | 0.9073 | 17/ 22   | N.ALSALSDLHAHK.L                                  | 2 | 1263.392 |
| IPI00410714 | 0.9993 | 20/ 30   | K.TYFPHFDLSHGSAQVK<br>.G                          | 2 | 1834.692 |
| IPI00410714 | 0.9988 | 19/ 22   | K.FLASVSTVLTSK.Y                                  | 2 | 1251.692 |
| IPI00410714 | 0.9722 | 18/ 28   | K.VGAHAGEYGAEALER.<br>M                           | 2 | 1530.392 |
| IPI00410714 | 0.9999 | 42/112   | K.VADALTNAVAHVDDM[<br>147.19]PNALSALSDLHA<br>HK.L | 3 | 3013.992 |
| IPI00410714 | 0.9904 | 17/ 26   | M.PNALSALSDLHAHK.L                                | 2 | 1474.792 |
| IPI00410714 | 0.9983 | 18/ 22   | K.FLASVSTVLTSK.Y                                  | 2 | 1251.592 |
| IPI00410714 | 0.9973 | 21/ 36   | K.VADALTNAVAHVDDM[<br>147.19]PNAL.S               | 2 | 1953.592 |
| IPI00410714 | 0.9986 | 17/ 26   | M.PNALSALSDLHAHK.L                                | 2 | 1474.792 |
| IPI00410714 | 0.9988 | 21/ 40   | K.VADALTNAVAHVDDM[<br>147.19]PNALSA.L             | 2 | 2110.892 |
| IPI00410714 | 0.997  | 16/ 22   | K.FLASVSTVLTSK.Y                                  | 2 | 1252.492 |
| IPI00410714 | 0.9978 | 30/ 60   | K.TYFPHFDLSHGSAQVK<br>.G                          | 3 | 1833.292 |
| IPI00410714 | 0.9887 | 14/ 16   | R.M[147.19]FLSFPTTK.<br>T                         | 2 | 1087.192 |
| IPI00410714 | 0.9993 | 19/ 22   | K.FLASVSTVLTSK.Y                                  | 2 | 1252.492 |
| IPI00410714 | 0.9943 | 14/ 16   | R.MFLSFPTTK.T                                     | 2 | 1071.392 |
| IPI00410714 | 0.9483 | 11/ 16   | R.M[147.19]FLSFPTTK.<br>T                         | 2 | 1088.292 |
| IPI00410714 | 0.9998 | 19/ 22   | K.FLASVSTVLTSK.Y                                  | 2 | 1252.392 |
| IPI00410714 | 0.9985 | 23/ 42   | K.VADALTNAVAHVDDM[<br>147.19]PNALSAL.S            | 2 | 2224.692 |
| IPI00410714 | 0.9997 | 36/ 84   | K.VADALTNAVAHVDDM[<br>147.19]PNALSAL.S            | 3 | 2224.692 |

|             |        |        |                                                   |   |          |
|-------------|--------|--------|---------------------------------------------------|---|----------|
| IPI00410714 | 1      | 32/ 92 | K.VGAHAGEYGAEALER<br>M[147.19]FLSFPTTK.T          | 3 | 2600.392 |
| IPI00410714 | 0.999  | 37/112 | K.VADALTNAVAHVDDM[<br>147.19]PNALSALSDLHA<br>HK.L | 3 | 3013.592 |
| IPI00410714 | 0.9979 | 47/100 | K.VADALTNAVAHVDDM[<br>147.19]PNALSALSDLH.<br>A    | 3 | 2676.492 |
| IPI00410714 | 1      | 18/ 22 | K.FLASVSTVLTSK.Y                                  | 2 | 1252.792 |
| IPI00410714 | 0.9992 | 19/ 22 | K.FLASVSTVLTSK.Y                                  | 2 | 1252.892 |
| IPI00410714 | 0.999  | 20/ 22 | K.FLASVSTVLTSK.Y                                  | 2 | 1252.692 |
| IPI00410714 | 0.9973 | 29/ 56 | K.VGAHAGEYGAEALER.<br>M                           | 3 | 1530.092 |
| IPI00410714 | 0.9999 | 28/ 56 | K.VGAHAGEYGAEALER.<br>M                           | 3 | 1530.492 |
| IPI00410714 | 0.9999 | 22/ 60 | K.TYFPHFDLSHGSAQVK<br>.G                          | 3 | 1834.792 |
| IPI00410714 | 0.9947 | 15/ 22 | K.FLASVSTVLTSK.Y                                  | 2 | 1252.692 |
| IPI00410714 | 0.9985 | 21/ 40 | K.VADALTNAVAHVDDM[<br>147.19]PNALSA.L             | 2 | 2111.392 |
| IPI00410714 | 0.9677 | 19/ 36 | K.VADALTNAVAHVDDM[<br>147.19]PNAL.S               | 2 | 1952.692 |
| IPI00410714 | 0.9964 | 43/108 | K.VADALTNAVAHVDDM[<br>147.19]PNALSALSDLHA<br>H.K  | 3 | 2885.592 |
| IPI00410714 | 0.9651 | 25/ 60 | K.LLSHC[160.14]LLVTL<br>AAHLPA.E                  | 3 | 1729.992 |
| IPI00410714 | 0.9614 | 28/104 | K.VADALTNAVAHVDDM[<br>147.19]PNALSALSDLHA<br>.H   | 3 | 2748.692 |
| IPI00410714 | 1      | 38/ 92 | K.LLSHC[160.14]LLVTL<br>AAHLP AEFTPAVHA.S         | 3 | 2583.392 |
| IPI00413451 | 1      | 21/ 28 | K.ADFSGM[147.19]SQT<br>DLSLSK.V                   | 2 | 1602.692 |
| IPI00413451 | 0.9349 | 17/ 22 | R.NLGM[147.19]TDAFE<br>LGK.A                      | 2 | 1311.592 |
| IPI00414609 | 0.975  | 14/ 18 | K.KTC[160.14]SVSEWII<br>.-                        | 2 | 1222.592 |
| IPI00414896 | 0.9941 | 16/ 24 | R.VC[160.14]EDGPVIFY<br>PPPK.K                    | 2 | 1504.092 |
| IPI00418336 | 0.9835 | 19/ 32 | K.GAAAAAASGAAGGG<br>GG.G                          | 2 | 1144.992 |
| IPI00419237 | 0.9994 | 20/ 22 | K.GITFDSGGISIK.A                                  | 2 | 1194.492 |
| IPI00419402 | 0.9257 | 16/ 28 | R.EGFPTDAPYPTTLGK.D<br>R.TVAAPSVFIFPPSDEQL        | 2 | 1594.192 |
| IPI00419424 | 1      | 26/ 34 | K.S                                               | 2 | 1946.892 |

|             |        |        |                                                        |   |          |
|-------------|--------|--------|--------------------------------------------------------|---|----------|
| IPI00419424 | 0.9849 | 28/ 68 | R.TVAAPSVFIFPPSDEQL<br>K.S                             | 3 | 1946.992 |
| IPI00419424 | 0.9894 | 18/ 30 | K.SGTASVVC[160.14]LL<br>NNFYPR.E                       | 2 | 1797.592 |
| IPI00419424 | 0.93   | 25/ 60 | K.SGTASVVC[160.14]LL<br>NNFYPR.E                       | 3 | 1799.592 |
| IPI00419424 | 0.9999 | 24/ 34 | R.TVAAPSVFIFPPSDEQL<br>K.S                             | 2 | 1946.692 |
| IPI00419424 | 0.9998 | 20/ 30 | K.SGTASVVC[160.14]LL<br>NNFYPR.E                       | 2 | 1798.692 |
| IPI00419424 | 0.9999 | 25/ 34 | R.TVAAPSVFIFPPSDEQL<br>K.S                             | 2 | 1946.792 |
| IPI00419424 | 0.9998 | 25/ 34 | R.TVAAPSVFIFPPSDEQL<br>K.S                             | 2 | 1946.792 |
| IPI00419424 | 0.9361 | 26/ 60 | K.SGTASVVC[160.14]LL<br>NNFYPR.E                       | 3 | 1799.192 |
| IPI00419424 | 1      | 19/ 30 | K.SGTASVVC[160.14]LL<br>NNFYPR.E                       | 2 | 1798.792 |
| IPI00419424 | 0.9995 | 42/132 | R.TVAAPSVFIFPPSDEQL<br>KSGTASVVC[160.14]LL<br>NNFYPR.E | 3 | 3726.592 |
| IPI00419424 | 0.9999 | 29/132 | R.TVAAPSVFIFPPSDEQL<br>KSGTASVVC[160.14]LL<br>NNFYPR.E | 3 | 3725.492 |
| IPI00419424 | 0.9997 | 22/ 34 | R.TVAAPSVFIFPPSDEQL<br>K.S                             | 2 | 1946.392 |
| IPI00419424 | 1      | 32/ 68 | R.TVAAPSVFIFPPSDEQL<br>K.S                             | 3 | 1946.092 |
| IPI00419424 | 0.9997 | 25/ 34 | R.TVAAPSVFIFPPSDEQL<br>K.S                             | 2 | 1945.892 |
| IPI00419424 | 0.9878 | 26/ 68 | R.TVAAPSVFIFPPSDEQL<br>K.S                             | 3 | 1946.092 |
| IPI00419424 | 0.9999 | 25/ 34 | R.TVAAPSVFIFPPSDEQL<br>K.S                             | 2 | 1946.792 |
| IPI00419424 | 0.9999 | 21/ 30 | K.SGTASVVC[160.14]LL<br>NNFYPR.E                       | 2 | 1798.992 |
| IPI00419424 | 0.9997 | 24/ 34 | R.TVAAPSVFIFPPSDEQL<br>K.S                             | 2 | 1946.692 |
| IPI00419424 | 0.9996 | 25/ 34 | R.TVAAPSVFIFPPSDEQL<br>K.S                             | 2 | 1946.292 |
| IPI00419424 | 1      | 22/ 34 | R.TVAAPSVFIFPPSDEQL<br>K.S                             | 2 | 1946.892 |
| IPI00419424 | 0.9999 | 19/ 30 | K.SGTASVVC[160.14]LL<br>NNFYPR.E                       | 2 | 1800.892 |
| IPI00419424 | 0.9854 | 17/ 30 | K.SGTASVVC[160.14]LL<br>NNFYPR.E                       | 2 | 1797.792 |
| IPI00419424 | 0.9997 | 21/ 30 | K.SGTASVVC[160.14]LL<br>NNFYPR.E                       | 2 | 1797.092 |

|             |        |        |                                                         |   |          |
|-------------|--------|--------|---------------------------------------------------------|---|----------|
| IPI00419424 | 0.9942 | 21/ 30 | K.SGTASVVC[160.14]LL<br>NNFYPR.E<br>R.TVAAPSVFIFPPSDEQL | 2 | 1800.092 |
| IPI00419424 | 0.999  | 41/132 | KSGTASVVC[160.14]LL<br>NNFYPR.E<br>K.SGTASVVC[160.14]LL | 3 | 3727.592 |
| IPI00419424 | 0.9986 | 20/ 30 | NNFYPR.E<br>R.TVAAPSVFIFPPSDEQL                         | 2 | 1800.192 |
| IPI00419424 | 0.9999 | 24/ 34 | K.S<br>R.TVAAPSVFIFPPSDEQL                              | 2 | 1946.692 |
| IPI00419424 | 0.9997 | 24/ 34 | K.S<br>R.TVAAPSVFIFPPSDEQL                              | 2 | 1946.192 |
| IPI00419424 | 1      | 23/ 34 | K.S<br>K.SGTASVVC[160.14]LL                             | 2 | 1945.892 |
| IPI00419424 | 0.9904 | 31/ 60 | NNFYPR.E<br>K.SGTASVVC[160.14]LL                        | 3 | 1798.792 |
| IPI00419424 | 1      | 20/ 30 | NNFYPR.E<br>K.SGTASVVC[160.14]LL                        | 2 | 1799.092 |
| IPI00419424 | 0.9885 | 21/ 30 | NNFYPR.E<br>K.VDNALQSGNSQESVT                           | 2 | 1799.792 |
| IPI00419424 | 0.9836 | 28/ 38 | EQDSK.D<br>K.VDNALQSGNSQESVT                            | 2 | 2135.592 |
| IPI00419424 | 0.9616 | 31/ 76 | EQDSK.D<br>K.VYAC[160.14]EVTHQ                          | 3 | 2136.092 |
| IPI00419424 | 0.9774 | 23/ 64 | GLSSPVTK.S<br>K.VYAC[160.14]EVTHQ                       | 3 | 1875.292 |
| IPI00419424 | 0.9999 | 21/ 32 | GLSSPVTK.S<br>V.YAC[160.14]EVTHQG                       | 2 | 1876.192 |
| IPI00419424 | 0.9997 | 23/ 30 | LSSPVTK.S<br>A.C[160.14]EVTHQGLS                        | 2 | 1776.792 |
| IPI00419424 | 0.9998 | 20/ 26 | SPVTK.S<br>K.VYAC[160.14]EVTHQ                          | 2 | 1541.892 |
| IPI00419424 | 0.9946 | 34/ 64 | GLSSPVTK.S<br>K.DSTYLSSTLTLK.A                          | 3 | 1877.292 |
| IPI00419424 | 0.9998 | 20/ 26 | K.VYAC[160.14]EVTHQ<br>GLSSPVTK.S                       | 2 | 1502.592 |
| IPI00419424 | 0.9978 | 21/ 32 | GLSSPVTK.S<br>K.VYAC[160.14]EVTHQ                       | 2 | 1876.992 |
| IPI00419424 | 0.9961 | 25/ 64 | GLSSPVTK.S<br>A.C[160.14]EVTHQGLS                       | 3 | 1877.292 |
| IPI00419424 | 1      | 21/ 26 | SPVTK.S<br>K.VYAC[160.14]EVTHQ                          | 2 | 1542.192 |
| IPI00419424 | 1      | 17/ 32 | GLSSPVTK.S<br>V.YAC[160.14]EVTHQG                       | 1 | 1875.292 |
| IPI00419424 | 1      | 22/ 30 | LSSPVTK.S<br>K.VYAC[160.14]EVTHQ                        | 2 | 1777.492 |
| IPI00419424 | 0.9922 | 29/ 64 | GLSSPVTK.S<br>K.VYAC[160.14]EVTHQ                       | 3 | 1877.392 |
| IPI00419424 | 0.9997 | 33/ 64 | GLSSPVTK.S                                              | 3 | 1877.292 |

|             |        |          |                                    |   |          |
|-------------|--------|----------|------------------------------------|---|----------|
| IPI00419424 | 0.9996 | 18/ 32   | K.VYAC[160.14]EVTHQ<br>GLSSPVT.K.S | 2 | 1877.592 |
| IPI00419424 | 0.9996 | 21/ 30   | K.VYAC[160.14]EVTHQ<br>GLSSPVT.K   | 2 | 1750.092 |
| IPI00419424 | 0.9944 | 19/ 30   | K.VYAC[160.14]EVTHQ<br>GLSSPVT.K   | 2 | 1746.892 |
| IPI00419424 | 0.9767 | 19/ 24   | D.STYLSSTLTLSK.A                   | 2 | 1388.392 |
| IPI00419424 | 0.9999 | 20/ 26   | K.DSTYLSSTLTLSK.A                  | 2 | 1502.892 |
| IPI00419424 | 0.9999 | 19/ 26   | K.DSTYLSSTLTLSK.A                  | 2 | 1503.492 |
| IPI00419424 | 0.9997 | 17/ 26   | K.DSTYLSSTLTLSK.A                  | 2 | 1502.192 |
| IPI00419424 | 0.913  | 16/ 26   | K.DSTYLSSTLTLSK.A                  | 2 | 1504.592 |
| IPI00419424 | 0.9067 | 24/ 28   | Y.AC[160.14]EVTHQGL<br>SSPVT.K.S   | 2 | 1613.992 |
| IPI00419424 | 0.995  | 19/ 64   | K.VYAC[160.14]EVTHQ<br>GLSSPVT.K.S | 3 | 1877.092 |
| IPI00419424 | 0.998  | 22/ 28   | Y.AC[160.14]EVTHQGL<br>SSPVT.K.S   | 2 | 1613.192 |
| IPI00419424 |        | 1 23/ 32 | K.VYAC[160.14]EVTHQ<br>GLSSPVT.K.S | 2 | 1875.792 |
| IPI00419424 | 0.9991 | 20/ 26   | K.DSTYLSSTLTLSK.A                  | 2 | 1503.792 |
| IPI00419424 | 0.9997 | 18/ 26   | K.DSTYLSSTLTLSK.A                  | 2 | 1502.692 |
| IPI00419424 | 0.9999 | 29/ 64   | K.VYAC[160.14]EVTHQ<br>GLSSPVT.K.S | 3 | 1877.192 |
| IPI00419424 |        | 1 21/ 26 | A.C[160.14]EVTHQGLS<br>SPVT.K.S    | 2 | 1542.792 |
| IPI00419424 | 0.9901 | 23/ 28   | Y.AC[160.14]EVTHQGL<br>SSPVT.K.S   | 2 | 1614.992 |
| IPI00419424 | 0.9976 | 23/ 30   | V.YAC[160.14]EVTHQG<br>LSSPVT.K.S  | 2 | 1777.592 |
| IPI00419424 | 0.9857 | 23/ 32   | K.VYAC[160.14]EVTHQ<br>GLSSPVT.K.S | 2 | 1876.692 |
| IPI00419424 | 0.9996 | 25/ 60   | V.YAC[160.14]EVTHQG<br>LSSPVT.K.S  | 3 | 1778.092 |
| IPI00419424 | 0.998  | 23/ 30   | V.YAC[160.14]EVTHQG<br>LSSPVT.K.S  | 2 | 1777.692 |
| IPI00419424 | 0.9254 | 23/ 28   | Y.AC[160.14]EVTHQGL<br>SSPVT.K.S   | 2 | 1613.692 |
| IPI00419424 | 0.9997 | 21/ 26   | A.C[160.14]EVTHQGLS<br>SPVT.K.S    | 2 | 1542.592 |
| IPI00419424 | 0.9836 | 19/ 26   | K.DSTYLSSTLTLSK.A                  | 2 | 1503.792 |
| IPI00419424 | 0.9945 | 20/ 26   | K.DSTYLSSTLTLSK.A                  | 2 | 1503.992 |
| IPI00419424 | 0.9972 | 20/ 26   | K.DSTYLSSTLTLSK.A                  | 2 | 1503.492 |
| IPI00419424 | 0.9998 | 18/ 26   | K.DSTYLSSTLTLSK.A                  | 2 | 1503.592 |
| IPI00419424 | 0.9999 | 23/ 30   | V.YAC[160.14]EVTHQG<br>LSSPVT.K.S  | 2 | 1776.592 |
| IPI00419424 | 0.9981 | 22/ 32   | K.VYAC[160.14]EVTHQ<br>GLSSPVT.K.S | 2 | 1875.792 |
| IPI00419424 | 0.9995 | 22/ 32   | K.VYAC[160.14]EVTHQ<br>GLSSPVT.K.S | 2 | 1879.092 |

|             |        |        |                                                                |   |          |
|-------------|--------|--------|----------------------------------------------------------------|---|----------|
| IPI00419424 | 0.9032 | 23/ 28 | Y.AC[160.14]EVTHQGL<br>SSPVTK.S                                | 2 | 1613.592 |
| IPI00419424 | 0.9992 | 21/ 26 | A.C[160.14]EVTHQGLS<br>SPVTK.S                                 | 2 | 1542.992 |
| IPI00419424 | 0.9985 | 24/ 64 | K.VYAC[160.14]EVTHQ<br>GLSSPVTK.S                              | 3 | 1877.892 |
| IPI00419424 | 1      | 16/ 32 | K.VYAC[160.14]EVTHQ<br>GLSSPVTK.S                              | 1 | 1876.092 |
| IPI00419424 | 0.9898 | 32/ 64 | K.VYAC[160.14]EVTHQ<br>GLSSPVTK.S                              | 3 | 1877.192 |
| IPI00419424 | 0.9915 | 23/ 28 | Y.AC[160.14]EVTHQGL<br>SSPVTK.S                                | 2 | 1614.692 |
| IPI00419424 | 0.999  | 23/ 30 | V.YAC[160.14]EVTHQG<br>LSSPVTK.S                               | 2 | 1777.492 |
| IPI00419424 | 0.9921 | 21/ 30 | K.VYAC[160.14]EVTHQ<br>GLSSPVT.K                               | 2 | 1748.492 |
| IPI00419424 | 0.998  | 20/ 26 | K.DSTYLSSTLTLSK.A                                              | 2 | 1502.392 |
| IPI00419424 | 0.9875 | 15/ 26 | K.DSTYLSSTLTLSK.A                                              | 2 | 1502.192 |
| IPI00419424 | 0.9998 | 17/ 26 | K.DSTYLSSTLTLSK.A                                              | 2 | 1503.092 |
| IPI00431645 | 0.9815 | 16/ 22 | K.SC[160.14]JVAEYGV<br>YVK.V                                   | 1 | 1344.692 |
| IPI00431645 | 0.9907 | 20/ 22 | K.SC[160.14]JVAEYGV<br>YVK.V                                   | 2 | 1345.792 |
| IPI00431645 | 0.9996 | 18/ 22 | K.SC[160.14]JVAEYGV<br>YVK.V                                   | 2 | 1346.692 |
| IPI00431645 | 0.9997 | 16/ 18 | K.VTSIQDWVQK.T                                                 | 2 | 1203.092 |
| IPI00431645 | 0.9763 | 21/ 26 | K.SPVGVQPILNEHTF.C                                             | 2 | 1537.492 |
| IPI00431645 | 0.9991 | 17/ 22 | K.DIAPTLTLYVGK.K<br>K.SC[160.14]JVAEYGV                        | 2 | 1290.592 |
| IPI00431645 | 0.9976 | 19/ 22 | YVK.V                                                          | 2 | 1345.092 |
| IPI00431645 | 0.9991 | 15/ 18 | K.VTSIQDWVQK.T                                                 | 2 | 1203.292 |
| IPI00431645 | 0.9909 | 19/ 22 | K.DIAPTLTLYVGK.K<br>K.YVM[147.19]LPVADQ                        | 2 | 1290.692 |
| IPI00431645 | 0.9978 | 22/ 26 | DQC[160.14]IR.H<br>K.SPVGVQPILNEHTFC[1<br>60.14]AGM[147.19]SK. | 2 | 1723.892 |
| IPI00431645 | 0.9999 | 31/ 76 | Y                                                              | 3 | 2189.492 |
| IPI00431645 | 0.9445 | 13/ 18 | W.YATGILSFDK.S<br>K.VVLHPNYSQVDIGLIK.                          | 2 | 1115.292 |
| IPI00431645 | 0.9939 | 27/ 60 | L<br>K.SPVGVQPILNEHTFC[1<br>60.14]AGM[147.19]SK.               | 3 | 1796.192 |
| IPI00431645 | 0.9999 | 31/ 76 | Y                                                              | 3 | 2188.392 |
| IPI00431656 | 1      | 26/ 34 | R.LYGSEAFATDFQDSAA<br>AK.K                                     | 2 | 1891.592 |
| IPI00431656 | 1      | 24/ 34 | R.LYGSEAFATDFQDSAA<br>AK.K                                     | 2 | 1891.792 |
| IPI00437751 | 0.9929 | 14/ 20 | R.TLGSANLPLAK.R                                                | 2 | 1084.192 |

|             |        |        |                                     |   |          |
|-------------|--------|--------|-------------------------------------|---|----------|
| IPI00465170 | 0.9707 | 14/ 26 | K.MFLITNSPSSFVDK.G                  | 2 | 1587.292 |
| IPI00465248 | 0.9996 | 15/ 24 | R.GNPTVEVDLFTSK.G                   | 2 | 1406.192 |
| IPI00465436 | 0.9996 | 32/ 72 | R.GPLLQDVVFTDEM[1<br>47.19]AHFDR.E  | 3 | 2205.592 |
| IPI00465436 | 0.9953 | 33/ 72 | R.GPLLQDVVFTDEMAH<br>FDR.E          | 3 | 2190.192 |
| IPI00465436 | 0.9968 | 18/ 26 | R.LGPNYLHIPVNC[160.<br>14]PY.R      | 2 | 1657.792 |
| IPI00472787 | 0.9591 | 17/ 40 | F.SDGLAHLNLK.G                      | 3 | 1183.492 |
| IPI00472787 | 0.9891 | 19/ 20 | K.VLGAFSDGLAH.L                     | 2 | 1085.792 |
| IPI00472787 | 0.9936 | 27/ 64 | K.KVLGAFSDGLAHLNL<br>K.G            | 3 | 1798.292 |
| IPI00472787 | 0.9999 | 32/ 64 | K.KVLGAFSDGLAHLNL<br>K.G            | 3 | 1798.692 |
| IPI00472787 | 0.9957 | 23/ 30 | K.VLGAFSDGLAHLNLK<br>.G             | 2 | 1670.692 |
| IPI00472787 | 0.9976 | 22/ 26 | K.VLGAFSDGLAHLNL.L                  | 2 | 1428.692 |
| IPI00472787 | 0.9995 | 27/ 64 | K.KVLGAFSDGLAHLNL<br>K.G            | 3 | 1798.092 |
| IPI00472787 | 0.9954 | 18/ 26 | L.GAFSDGLAHLNLK.G                   | 2 | 1457.292 |
| IPI00472787 | 0.9898 | 25/ 60 | K.VLGAFSDGLAHLNLK<br>.G             | 3 | 1669.492 |
| IPI00472787 | 0.9986 | 24/ 30 | K.VLGAFSDGLAHLNLK<br>.G             | 2 | 1669.392 |
| IPI00472787 | 0.9986 | 21/ 24 | K.VLGAFSDGLAHLN                     | 2 | 1314.592 |
| IPI00472787 | 0.9999 | 21/ 26 | L.GAFSDGLAHLNLK.G                   | 2 | 1457.492 |
| IPI00472787 | 0.9999 | 23/ 28 | V.LGAFSDGLAHLNLK.<br>G              | 2 | 1570.392 |
| IPI00472787 | 0.9879 | 23/ 30 | K.VLGAFSDGLAHLNLK<br>.G             | 2 | 1670.392 |
| IPI00472787 | 0.9159 | 29/ 60 | K.VLGAFSDGLAHLNLK<br>.G             | 3 | 1670.692 |
| IPI00472787 | 1      | 23/ 28 | K.VLGAFSDGLAHLNL.<br>K              | 2 | 1542.492 |
| IPI00472787 | 0.9906 | 30/ 92 | P.KVKAHGKKVLGAFSDG<br>LAHLNLK.G     | 3 | 2548.192 |
| IPI00472787 | 0.9963 | 20/ 28 | K.VLGAFSDGLAHLNL.<br>K              | 2 | 1542.092 |
| IPI00472787 | 0.997  | 21/ 32 | K.LHVDPENFR.L                       | 3 | 1126.992 |
| IPI00472787 | 0.9127 | 13/ 16 | K.LHVDPENFR.L                       | 2 | 1126.992 |
| IPI00472787 | 0.9894 | 21/ 32 | K.LHVDPENFR.L                       | 3 | 1125.892 |
| IPI00472787 | 0.9242 | 12/ 16 | K.LHVDPENFR.L                       | 2 | 1126.392 |
| IPI00472787 | 0.9976 | 13/ 16 | K.LHVDPENFR.L                       | 2 | 1126.392 |
| IPI00472787 | 1      | 23/ 36 | R.FFESFGDLSSPDAVM[<br>147.19]GNPK.V | 2 | 2060.392 |



|             |        |        |                                          |   |          |
|-------------|--------|--------|------------------------------------------|---|----------|
| IPI00472787 | 0.9999 | 23/ 36 | R.FFESFGDLSSPDAVM[<br>147.19]GNPK.V      | 2 | 2063.792 |
| IPI00472787 | 0.9999 | 37/ 72 | R.FFESFGDLSSPDAVM[<br>147.19]GNPK.V      | 3 | 2060.992 |
| IPI00472787 | 0.9641 | 17/ 32 | R.FFESFGDLSSPDAVM[<br>147.19]GN.P        | 2 | 1837.092 |
| IPI00472787 | 0.9998 | 22/ 36 | R.FFESFGDLSSPDAVM[<br>147.19]GNPK.V      | 2 | 2060.492 |
| IPI00473011 | 0.9296 | 18/ 22 | K.EFTPQM[147.19]QAA<br>YQK.V             | 2 | 1457.192 |
| IPI00473011 | 0.9156 | 14/ 16 | T.PQM[147.19]QAAYQK<br>.V                | 2 | 1079.792 |
| IPI00473011 | 0.9607 | 18/ 22 | K.EFTPQM[147.19]QAA<br>YQK.V             | 2 | 1460.192 |
| IPI00473011 | 0.9999 | 26/ 60 | R.NFGKEFTPQM[147.19]<br>]QAAYQK.V        | 3 | 1903.692 |
| IPI00473011 | 0.9969 | 17/ 22 | K.EFTPQMQAAYQK.V                         | 2 | 1441.292 |
| IPI00473011 | 0.9994 | 19/ 22 | K.VVAGVANALAHK.Y                         | 2 | 1150.292 |
| IPI00473011 | 0.9932 | 19/ 22 | K.VVAGVANALAHK.Y                         | 2 | 1148.892 |
| IPI00473011 | 0.9948 | 18/ 20 | V.VAGVANALAHK.Y                          | 2 | 1051.092 |
| IPI00473011 | 0.9801 | 15/ 18 | V.AGVANALAHK.Y                           | 2 | 951.692  |
| IPI00473011 | 0.9995 | 20/ 22 | K.VVAGVANALAHK.Y                         | 2 | 1150.692 |
| IPI00473011 | 0.9172 | 16/ 22 | V.AGVANALAHKYH.-                         | 2 | 1251.492 |
| IPI00473011 | 0.9996 | 19/ 22 | K.VVAGVANALAHK.Y                         | 2 | 1150.692 |
| IPI00473011 | 0.9987 | 17/ 22 | K.VVAGVANALAHK.Y                         | 2 | 1148.192 |
| IPI00477090 | 0.9547 | 14/ 24 | K.NVPLPVIAELPPK.V                        | 2 | 1387.592 |
| IPI00477090 | 0.9651 | 19/ 24 | K.NVPLPVIAELPPK.V                        | 2 | 1387.892 |
| IPI00478003 | 0.999  | 21/ 28 | K.AAQVTIQSSGTFSSK.F                      | 2 | 1513.092 |
| IPI00478003 | 0.9985 | 14/ 16 | K.FEVQVTPK.I<br>K.VTGEGC[160.14]VYL      | 2 | 1046.092 |
| IPI00478003 | 0.9883 | 21/ 26 | QTSLK.Y                                  | 2 | 1553.992 |
| IPI00478003 | 0.9654 | 12/ 18 | K.GHFSISIPVK.S<br>K.QQNAQGGFSSTQDTV      | 2 | 1084.092 |
| IPI00478003 | 0.9921 | 27/ 88 | VALHALSK.Y<br>K.SSSNEEVM[147.19]F        | 3 | 2388.292 |
| IPI00478003 | 0.9994 | 21/ 28 | LTVQVK.G                                 | 2 | 1712.892 |
| IPI00478003 | 0.9933 | 13/ 18 | R.QGIPFGQVR.L<br>R.LLIYAVLPTGDVIGDSA     | 2 | 1148.792 |
| IPI00478003 | 0.9669 | 26/ 34 | K.Y                                      | 2 | 1845.592 |
| IPI00478003 | 0.9973 | 27/ 52 | R.TEHPFTVEEFVLPK.F                       | 3 | 1673.892 |
| IPI00478003 | 0.9934 | 16/ 26 | R.TEHPFTVEEFVLPK.F<br>R.VSVQLEASPAFLAVPV | 2 | 1672.992 |
| IPI00478003 | 0.9999 | 23/ 34 | EK.E<br>R.LLLQQVSLPELPGEYS               | 2 | 1883.892 |
| IPI00478003 | 0.9291 | 24/ 68 | M[147.19]K.V<br>R.LLLQQVSLPELPGEYS       | 3 | 2063.292 |
| IPI00478003 | 0.9997 | 20/ 34 | M[147.19]K.V                             | 2 | 2060.892 |

|             |        |        |                                                         |   |          |
|-------------|--------|--------|---------------------------------------------------------|---|----------|
| IPI00478003 | 0.9993 | 20/ 26 | K.VTGEGC[160.14]VYL<br>QTSLK.Y                          | 2 | 1555.392 |
| IPI00478003 | 0.9986 | 14/ 16 | K.FEVQVTPVK.I                                           | 2 | 1046.992 |
| IPI00478003 | 0.9064 | 10/ 18 | K.GHFSISIPVK.S                                          | 2 | 1084.292 |
| IPI00478003 | 0.9999 | 29/ 88 | K.QQNAQGGFSSTQDTV<br>VALHALSK.Y                         | 3 | 2388.392 |
| IPI00478003 | 0.9997 | 22/ 28 | K.SSSNEEVM[147.19]F<br>LTVQVK.G                         | 2 | 1713.592 |
| IPI00478003 | 0.9655 | 15/ 18 | R.QGIPFFGQVR.L                                          | 2 | 1149.492 |
| IPI00478003 | 0.9971 | 30/ 52 | R.TEHPFTVEEFVLPK.F                                      | 3 | 1674.892 |
| IPI00478003 | 0.9986 | 22/ 34 | R.VSVQLEASPAFLAVPV<br>EK.E                              | 2 | 1884.792 |
| IPI00478003 | 0.9994 | 16/ 18 | K.LSFYYLIM[147.19]AK<br>.G                              | 2 | 1264.692 |
| IPI00478003 | 0.9999 | 20/ 34 | R.LLLQQVSLPELPGEYS<br>M[147.19]K.V                      | 2 | 2060.892 |
| IPI00478003 | 1      | 25/ 34 | R.LLIYAVLPTGDVIGDSA<br>K.Y                              | 2 | 1845.792 |
| IPI00478003 | 0.9696 | 22/ 38 | R.AYIFIDEAHITQALIWL<br>SQR.Q                            | 2 | 2389.692 |
| IPI00478003 | 0.9669 | 14/ 16 | K.FEVQVTPVK.I                                           | 2 | 1046.292 |
| IPI00478003 | 0.9992 | 22/ 34 | R.VSVQLEASPAFLAVPV<br>EK.E                              | 2 | 1883.792 |
| IPI00478003 | 0.9988 | 24/ 34 | R.LLIYAVLPTGDVIGDSA<br>K.Y                              | 2 | 1845.192 |
| IPI00478916 | 0.9837 | 25/ 88 | K.RS[167.08]DHLINTES<br>EAVNLSKVKVFTK.S                 | 3 | 2696.092 |
| IPI00479186 | 0.9999 | 26/ 42 | R.LAPITSDPTEATAVGAV<br>EASFK.C                          | 2 | 2174.992 |
| IPI00479186 | 0.9999 | 30/ 42 | R.LAPITSDPTEATAVGAV<br>EASFK.C                          | 2 | 2176.092 |
| IPI00479186 | 1      | 35/ 84 | R.LAPITSDPTEATAVGAV<br>EASFK.C                          | 3 | 2175.592 |
| IPI00479708 | 0.9984 | 19/ 30 | K.LSSVNAADTAVYYC[16<br>0.14]AR.V                        | 2 | 1761.592 |
| IPI00479708 | 0.9976 | 19/ 30 | K.LSSVNAADTAVYYC[16<br>0.14]AR.V                        | 2 | 1761.592 |
| IPI00479877 | 0.998  | 16/ 18 | K.IGDPLLEDTR.M                                          | 2 | 1127.392 |
| IPI00514949 | 0.9287 | 14/ 20 | R.LVLVAAWNNYR.T                                         | 2 | 1319.392 |
| IPI00550640 | 0.9924 | 37/104 | K.YGPPC[160.14]PSC[1<br>60.14]PAPEFLGGPSVFL<br>FPPKPK.D | 3 | 2944.492 |
| IPI00550640 | 0.9999 | 20/ 32 | K.TTppvLSDGSFFLYSR<br>.L                                | 2 | 1901.892 |
| IPI00550640 | 0.9993 | 40/104 | K.YGPPC[160.14]PSC[1<br>60.14]PAPEFLGGPSVFL<br>FPPKPK.D | 3 | 2945.092 |

|             |        |        |                                                     |   |          |
|-------------|--------|--------|-----------------------------------------------------|---|----------|
| IPI00550640 | 0.9998 | 42/104 | K.YGPPC[160.14]PSC[160.14]PAPEFLGGPSVFL<br>FPPKPK.D | 3 | 2945.692 |
| IPI00550640 | 0.9998 | 23/ 32 | K.TTPPVLDSDGSFFLYSR<br>.L                           | 2 | 1901.592 |
| IPI00550640 | 0.9999 | 39/104 | K.YGPPC[160.14]PSC[160.14]PAPEFLGGPSVFL<br>FPPKPK.D | 3 | 2943.392 |
| IPI00550640 | 1      | 40/104 | K.YGPPC[160.14]PSC[160.14]PAPEFLGGPSVFL<br>FPPKPK.D | 3 | 2944.792 |
| IPI00550640 | 0.9947 | 41/104 | K.YGPPC[160.14]PSC[160.14]PAPEFLGGPSVFL<br>FPPKPK.D | 3 | 2945.292 |
| IPI00550640 | 1      | 23/ 32 | K.TTPPVLDSDGSFFLYSR<br>.L                           | 2 | 1902.092 |
| IPI00550640 | 0.9998 | 37/104 | K.YGPPC[160.14]PSC[160.14]PAPEFLGGPSVFL<br>FPPKPK.D | 3 | 2944.392 |
| IPI00550640 | 0.9293 | 24/ 96 | G.PPC[160.14]PSC[160.14]PAPEFLGGPSVFLFP<br>PKPK.D   | 3 | 2725.392 |
| IPI00550640 | 1      | 41/104 | K.YGPPC[160.14]PSC[160.14]PAPEFLGGPSVFL<br>FPPKPK.D | 3 | 2945.192 |
| IPI00550640 | 0.9975 | 38/104 | K.YGPPC[160.14]PSC[160.14]PAPEFLGGPSVFL<br>FPPKPK.D | 3 | 2944.292 |
| IPI00550640 | 0.9118 | 41/104 | K.YGPPC[160.14]PSC[160.14]PAPEFLGGPSVFL<br>FPPKPK.D | 3 | 2945.092 |
| IPI00550640 | 0.9966 | 33/104 | K.YGPPC[160.14]PSC[160.14]PAPEFLGGPSVFL<br>FPPKPK.D | 3 | 2943.592 |
| IPI00550991 | 0.9994 | 16/ 18 | R.NLAVSQVVHK.A                                      | 2 | 1093.792 |
| IPI00550991 | 0.9973 | 17/ 18 | K.ADLSGITGAR.N                                      | 2 | 961.492  |
| IPI00550991 | 0.9522 | 13/ 16 | R.EIGELYLPK.F                                       | 2 | 1061.792 |
| IPI00550991 | 1      | 27/ 36 | K.AVLDFEEGTEASAAT<br>AVK.I                          | 2 | 1908.992 |
| IPI00550991 | 0.9998 | 28/ 38 | R.DYNLNDILLQLGIEEAF<br>TSK.A                        | 2 | 2295.792 |
| IPI00550991 | 0.9999 | 40/ 76 | R.DYNLNDILLQLGIEEAF<br>TSK.A                        | 3 | 2297.492 |
| IPI00550991 | 0.9994 | 16/ 18 | R.NLAVSQVVHK.A                                      | 2 | 1094.092 |
| IPI00550991 | 0.9999 | 26/ 36 | K.AVLDFEEGTEASAAT<br>AVK.I                          | 2 | 1907.392 |
| IPI00550991 | 0.9996 | 15/ 18 | R.NLAVSQVVHK.A                                      | 2 | 1095.292 |
| IPI00550991 | 0.9999 | 17/ 18 | K.ADLSGITGAR.N                                      | 2 | 961.392  |

|             |        |          |                                                                   |   |          |
|-------------|--------|----------|-------------------------------------------------------------------|---|----------|
| IPI00550991 | 0.9994 | 26/ 36   | K.AVLDFVEEGTEASAAT<br>AVK.I                                       | 2 | 1907.992 |
| IPI00553177 | 0.9995 | 36/108   | H.DEILEGLNFNLTETIPEA<br>QIHEGFQELLR.T                             | 3 | 3268.992 |
| IPI00553177 | 0.998  | 43/124   | K.ADTHDEILEGLNFNLTETIPEA<br>QIHEGFQELLR.T                         | 3 | 3694.092 |
| IPI00553177 | 0.9996 | 48/124   | K.ADTHDEILEGLNFNLTETIPEA<br>QIHEGFQELLR.T                         | 3 | 3693.292 |
| IPI00553177 | 0.9313 | 47/124   | K.ADTHDEILEGLNFNLTETIPEA<br>QIHEGFQELLR.T                         | 3 | 3695.292 |
| IPI00553177 | 0.9996 | 37/108   | H.DEILEGLNFNLTETIPEA<br>QIHEGFQELLR.T                             | 3 | 3269.692 |
| IPI00553177 | 0.9997 | 50/124   | K.ADTHDEILEGLNFNLTETIPEA<br>QIHEGFQELLR.T                         | 3 | 3692.992 |
| IPI00553177 | 0.9996 | 26/ 48   | Q.HLENELTHDIITK.F                                                 | 3 | 1564.292 |
| IPI00553177 | 0.9987 | 18/ 30   | K.YLGNATAIFFLPDEGK.<br>L                                          | 2 | 1757.192 |
| IPI00553177 | 0.9947 | 13/ 16   | K.LSSWVLLM[147.19]K<br>.Y                                         | 2 | 1092.692 |
| IPI00553177 | 0.9986 | 13/ 16   | K.LSSWVLLM[147.19]K<br>.Y                                         | 2 | 1092.892 |
| IPI00553215 | 0.9998 | 18/ 24   | R.VSWYQQPPGTAPK.L                                                 | 2 | 1458.992 |
| IPI00555812 |        | 1 28/ 38 | K.SYLSM[147.19]VGSC<br>[160.14]C[160.14]TSA<br>SPTVC[160.14]FL.K  | 2 | 2243.592 |
| IPI00555812 | 0.9358 | 30/112   | K.TAM[147.19]DVFVC[<br>160.14]TYFM[147.19]P<br>AAQLPELPDVELPTNK.D | 3 | 3333.692 |
| IPI00555812 | 0.9997 | 26/ 40   | K.VPTADLEDVLPLAEDIT<br>NILS.K                                     | 2 | 2238.792 |
| IPI00642790 | 0.9761 | 30/ 60   | K.GIIAHATPQC[160.14]<br>QINQVK.F                                  | 3 | 1777.692 |
| IPI00643920 | 0.9992 | 20/ 26   | R.TVPFC[160.14]STFAA<br>FFTR.A                                    | 2 | 1651.792 |
| IPI00646304 | 0.9997 | 20/ 24   | K.TVDNFVALATGEK.G                                                 | 2 | 1364.692 |
| IPI00654755 | 0.9741 | 15/ 22   | K.EFTPPVQAAYQK.V                                                  | 1 | 1377.692 |
| IPI00654755 | 0.9792 | 15/ 18   | F.TPPVQAAYQK.V                                                    | 2 | 1102.192 |
| IPI00654755 | 0.9447 | 21/ 44   | K.EFTPPVQAAYQK.V                                                  | 3 | 1378.592 |
| IPI00654755 |        | 1 13/ 22 | K.EFTPPVQAAYQK.V                                                  | 1 | 1379.592 |
| IPI00654755 | 0.9974 | 18/ 22   | K.EFTPPVQAAYQK.V                                                  | 2 | 1379.092 |
| IPI00654755 | 0.9531 | 16/ 22   | K.EFTPPVQAAYQK.V                                                  | 2 | 1381.192 |
| IPI00654755 | 0.9566 | 18/ 22   | K.EFTPPVQAAYQK.V                                                  | 2 | 1377.792 |

|             |        |        |                      |   |          |
|-------------|--------|--------|----------------------|---|----------|
| IPI00654755 | 0.9895 | 15/ 16 | T.PPVQAAYQK.V        | 2 | 1001.192 |
| IPI00654755 | 0.974  | 14/ 18 | K.EFTPPVQAAY.Q       | 2 | 1122.092 |
| IPI00654755 | 0.913  | 18/ 22 | K.EFTPPVQAAYQK.V     | 2 | 1379.292 |
| IPI00654755 | 0.9982 | 16/ 18 | K.GTFATLSELH.C       | 2 | 1074.892 |
|             |        |        | F.GDLSTPDAVM[147.19  |   |          |
| IPI00654755 | 0.9846 | 19/ 26 | ]GNPK.V              | 2 | 1418.192 |
| IPI00654755 | 0.9989 | 18/ 20 | N.VDEVGGEALGR.L      | 2 | 1101.392 |
|             |        |        | G.DLSTPDAVM[147.19]  |   |          |
| IPI00654755 | 0.9959 | 17/ 24 | GNPK.V               | 2 | 1360.792 |
| IPI00654755 | 0.9908 | 18/ 24 | K.VNVDEVGGEALGR.L    | 2 | 1317.192 |
| IPI00654755 | 0.999  | 19/ 24 | K.VNVDEVGGEALGR.L    | 2 | 1313.692 |
| IPI00654755 | 0.9978 | 18/ 24 | K.VNVDEVGGEALGR.L    | 2 | 1314.092 |
| IPI00654755 | 0.992  | 15/ 24 | K.VNVDEVGGEALGR.L    | 1 | 1313.592 |
| IPI00654755 | 0.9983 | 27/ 48 | K.VNVDEVGGEALGR.L    | 3 | 1314.592 |
| IPI00654755 | 0.9576 | 16/ 22 | V.NVDEVGGEALGR.L     | 2 | 1215.092 |
| IPI00654755 | 1      | 16/ 24 | K.VNVDEVGGEALGR.L    | 1 | 1315.692 |
|             |        |        | E.SFGDLSTPDAVM[147.  |   |          |
| IPI00654755 | 0.9987 | 21/ 30 | 19]GNPK.V            | 2 | 1651.192 |
|             |        |        | F.ESFGDLSTPDAVM[147  |   |          |
| IPI00654755 | 1      | 19/ 32 | .19]GNPK.V           | 2 | 1780.492 |
|             |        |        | F.FESFGDLSTPDAVM[14  |   |          |
| IPI00654755 | 0.9994 | 24/ 34 | 7.19]GNPK.V          | 2 | 1927.392 |
|             |        |        | R.FFESFGDLSTPDAVM[   |   |          |
| IPI00654755 | 1      | 24/ 36 | 147.19]GNPK.V        | 2 | 2074.992 |
|             |        |        | R.FFES[167.08]FGDLST |   |          |
| IPI00654755 | 0.9936 | 17/ 36 | PDAVM[147.19]GNPK.V  | 2 | 2157.692 |
|             |        |        | R.FFESFGDLSTPDAVM[   |   |          |
| IPI00654755 | 0.9453 | 37/ 72 | 147.19]GNPK.V        | 3 | 2076.192 |
|             |        |        | R.FFESFGDLSTPDAVM[   |   |          |
| IPI00654755 | 1      | 23/ 36 | 147.19]GNPK.V        | 2 | 2074.392 |
|             |        |        | R.FFESFGDLSTPDAVM[   |   |          |
| IPI00654755 | 0.9989 | 24/ 36 | 147.19]GNPK.V        | 2 | 2075.692 |
|             |        |        | R.FFESFGDLSTPDAVMG   |   |          |
| IPI00654755 | 0.9903 | 17/ 36 | NPK.V                | 2 | 2061.192 |
|             |        |        | R.FFESFGDLSTPDAVM[   |   |          |
| IPI00654755 | 0.9542 | 24/ 32 | 147.19]GN.P          | 2 | 1849.492 |
| IPI00654755 | 0.9895 | 18/ 22 | R.FFESFGDLSTPD.A     | 2 | 1362.192 |
|             |        |        | R.FFESFGDLSTPDAVMG   |   |          |
| IPI00654755 | 1      | 25/ 36 | NPK.V                | 2 | 2058.692 |
|             |        |        | R.FFESFGDLSTPDAVM[   |   |          |
| IPI00654755 | 0.9997 | 22/ 36 | 147.19]GNPK.V        | 2 | 2075.092 |
|             |        |        | R.FFESFGDLSTPDAVM[   |   |          |
| IPI00654755 | 0.9953 | 23/ 32 | 147.19]GN.P          | 2 | 1849.292 |
|             |        |        | R.FFESFGDLSTPDAVM[   |   |          |
| IPI00654755 | 0.9999 | 33/ 72 | 147.19]GNPK.V        | 3 | 2075.292 |
|             |        |        | R.FFESFGDLSTPDAVM[   |   |          |
| IPI00654755 | 0.9999 | 20/ 36 | 147.19]GNPK.V        | 2 | 2074.592 |

|             |        |          |                                                      |   |          |
|-------------|--------|----------|------------------------------------------------------|---|----------|
| IPI00654755 | 0.9993 | 40/ 72   | R.FFESFGDLSTPDAVM[<br>147.19]GNPK.V                  | 3 | 2074.592 |
| IPI00654755 |        | 1 24/ 32 | R.FFESFGDLSTPDAVM[<br>147.19]GN.P                    | 2 | 1850.392 |
| IPI00654755 | 0.9882 | 18/ 22   | R.FFESFGDLSTPD.A                                     | 2 | 1361.492 |
| IPI00654755 | 0.9878 | 18/ 36   | R.FFESFGDLSTPDAVM[<br>147.19]GNPK.V                  | 2 | 2074.492 |
| IPI00654755 | 0.9908 | 20/ 28   | S.FGDLSTPDAVM[147.1<br>9]GNPK.V                      | 2 | 1564.592 |
| IPI00654755 |        | 1 18/ 32 | F.ESFGDLSTPDAVM[147<br>.19]GNPK.V                    | 2 | 1780.692 |
| IPI00654755 | 0.9987 | 22/ 34   | F.FESFGDLSTPDAVM[14<br>7.19]GNPK.V                   | 2 | 1927.892 |
| IPI00654755 | 0.9986 | 24/ 36   | R.FFESFGDLSTPDAVM[<br>147.19]GNPK.V                  | 2 | 2075.092 |
| IPI00654755 | 0.9951 | 22/ 24   | R.LLGNVLC[160.14]VL<br>AHH.F                         | 2 | 1444.992 |
| IPI00654755 | 0.937  | 20/ 22   | R.LLGNVLC[160.14]VL<br>AH.H                          | 2 | 1307.292 |
| IPI00654755 | 0.9915 | 20/ 24   | R.LLGNVLC[160.14]VL<br>AHH.F                         | 2 | 1445.092 |
| IPI00735973 | 0.9714 | 8/ 12    | R.GAPGAHR.D                                          | 1 | 663.592  |
| IPI00736860 | 0.9548 | 22/ 32   | K.TTPPM[147.19]LDSN<br>GSFFLYSK.L                    | 2 | 1921.692 |
| IPI00736860 | 0.954  | 21/ 32   | K.TTPPM[147.19]LDSN<br>GSFFLYSK.L                    | 2 | 1921.292 |
| IPI00736860 | 0.9756 | 22/ 32   | K.TTPPM[147.19]LDSN<br>GSFFLYSK.L                    | 2 | 1921.592 |
| IPI00736860 | 0.9973 | 19/ 32   | K.TTPMLDSNGSFFLYS<br>K.L                             | 2 | 1905.892 |
| IPI00736860 | 0.9741 | 20/ 32   | K.TTPMLDSNGSFFLYS<br>K.L                             | 2 | 1905.492 |
| IPI00736872 | 0.9999 | 23/ 34   | K.GEADAM[147.19]SLD<br>GGYVYTAGK.C                   | 2 | 1820.592 |
| IPI00736872 | 0.9994 | 24/ 34   | K.GEADAM[147.19]SLD<br>GGYVYTAGK.C                   | 2 | 1821.492 |
|             |        |          | -                                                    |   |          |
| IPI00736885 | 0.9826 | 42/ 92   | .DIVM[147.19]TQSPLSL<br>PVTPGEPASISC[160.14<br>]R.S  | 3 | 2572.292 |
| IPI00739675 | 0.9982 | 30/ 36   | C.EVQLVESGGGLVQPG<br>GSLK.L                          | 2 | 1853.492 |
| IPI00743194 | 0.9973 | 29/ 92   | A.DIVM[147.19]TQTPL<br>SLSVTPGQPASISC[160.<br>14]K.S | 3 | 2547.192 |
| IPI00747115 | 0.9517 | 16/ 22   | K.VXAGXANALAHK.Y                                     | 2 | 1178.392 |
| IPI00784830 | 0.9947 | 25/ 36   | C.EAQVVES[167.08]GG<br>GLVQPGSLR.L                   | 2 | 1922.292 |

**Suppl. Doc 3: Proteins with Protein Prophet scores greater than 0.9 identified from EPS but only have single peptide hit.**

| protein by<br>representative<br>IPI number | protein<br>probability | percent<br>coverage | num unique<br>peps | tot num<br>peps | percent share<br>of spectrum<br>id's | peptide sequence*         | Peptide ProPhet<br>probability | ions   | precursor<br>charge | precursor<br>neutral<br>mass |
|--------------------------------------------|------------------------|---------------------|--------------------|-----------------|--------------------------------------|---------------------------|--------------------------------|--------|---------------------|------------------------------|
| IPI00060800                                | 0.98                   | 5.2                 | 1                  | 1               | 0.04                                 | R.VSVGLLLVK.S             | 0.9982                         | 14/ 16 | 2                   | 926.992                      |
| IPI00009030                                | 0.96                   | 2                   | 1                  | 2               | 0.07                                 | R.IPLNDLFR.C              | 0.9958                         | 13/ 14 | 2                   | 987.392                      |
| IPI00220993                                | 0.92                   | 2.2                 | 1                  | 1               | 0.03                                 | R.AIFTGYGK.G              | 0.9907                         | 14/ 16 | 2                   | 1019.592                     |
| IPI00179185                                | 0.99                   | 1.6                 | 1                  | 1               | 0.04                                 | R.LLGC[160.14]AVLAPR.C    | 0.9998                         | 17/ 18 | 2                   | 1069.592                     |
| IPI00031121                                | 0.95                   | 1.7                 | 1                  | 1               | 0.03                                 | R.SNAQGIDLNR.N            | 0.9946                         | 15/ 18 | 2                   | 1087.992                     |
| IPI00479877                                | 0.98                   | 1.9                 | 1                  | 1               | 0.04                                 | K.IGDPLLEDTR.M            | 0.998                          | 16/ 18 | 2                   | 1127.392                     |
| IPI00419237                                | 0.99                   | 2.3                 | 1                  | 1               | 0.04                                 | K.GITFDSGGISIK.A          | 0.9994                         | 20/ 22 | 2                   | 1194.492                     |
| IPI00029863                                | 0.97                   | 2.2                 | 1                  | 2               | 0.06                                 | R.LC[160.14]QDLGPGAFR.L   | 0.9978                         | 18/ 20 | 2                   | 1233.492                     |
| IPI00013890                                | 0.99                   | 8.8                 | 1                  | 1               | 0.04                                 | R.SAYQEAM[147.19]DISK.K   | 0.9987                         | 15/ 20 | 2                   | 1259.392                     |
| IPI00220766                                | 0.97                   | 5.5                 | 1                  | 1               | 0.04                                 | K.DFLLQQTM[147.19]LR.V    | 0.9975                         | 14/ 18 | 2                   | 1281.092                     |
| IPI00025318                                | 0.99                   | 11.4                | 1                  | 1               | 0.04                                 | R.VYIASSGSGTAIK.K         | 0.9997                         | 20/ 24 | 2                   | 1284.792                     |
| IPI00027806                                | 0.98                   | 2.2                 | 1                  | 2               | 0.07                                 | K.AVYLVLC[160.14]NYSK.G   | 0.9847                         | 14/ 20 | 2                   | 1313.692                     |
| IPI00021828                                | 0.99                   | 12.2                | 1                  | 2               | 0.07                                 | K.SQVVAGTNYFIK.V          | 0.9927                         | 19/ 22 | 2                   | 1326.192                     |
| IPI00219757                                | 0.97                   | 21.2                | 1                  | 2               | 0.07                                 | -.PPYTVVYFPVR.G           | 0.9979                         | 16/ 20 | 2                   | 1338.592                     |
| IPI00018314                                | 0.94                   | 2.7                 | 1                  | 1               | 0.03                                 | R.FDNTYSFIHAK.K           | 0.9937                         | 24/ 40 | 3                   | 1343.892                     |
| IPI00025427                                | 0.99                   | 7.5                 | 1                  | 2               | 0.07                                 | R.YPVVVPVHLDTTI.-         | 0.9998                         | 19/ 22 | 2                   | 1354.992                     |
| IPI00646304                                | 0.99                   | 17.1                | 1                  | 1               | 0.04                                 | K.TVDNFVALATGEK.G         | 0.9997                         | 20/ 24 | 2                   | 1364.692                     |
| IPI00295741                                | 0.98                   | 3.8                 | 1                  | 2               | 0.07                                 | R.LC[160.14]GTFLGGPKPPQ.R | 0.9856                         | 19/ 24 | 2                   | 1371.792                     |

|             |      |      |   |   |      |                                           |        |        |   |          |
|-------------|------|------|---|---|------|-------------------------------------------|--------|--------|---|----------|
| IPI00016150 | 0.98 | 3.2  | 1 | 1 | 0.04 | R.QEVPLATLEPLVK.A                         | 0.9991 | 20/ 24 | 2 | 1437.792 |
| IPI00027509 | 0.99 | 2.1  | 1 | 1 | 0.04 | K.LGLGADVAQVTGALR.S                       | 1      | 22/ 28 | 2 | 1440.992 |
| IPI00553215 | 0.99 | 13.1 | 1 | 2 | 0.05 | R.VSWYQPPGTAPK.L                          | 0.9998 | 18/ 24 | 2 | 1458.992 |
| IPI00023151 | 0.95 | 1.8  | 1 | 1 | 0.03 | R.LIQVDLNNPIAVR.M                         | 0.9947 | 18/ 24 | 2 | 1465.992 |
| IPI00168479 | 0.99 | 4.9  | 1 | 1 | 0.04 | K.LFGYEPTIYYPK.R                          | 0.9996 | 14/ 22 | 2 | 1490.792 |
| IPI00186308 | 0.93 | 2.1  | 1 | 1 | 0.03 | R.AQLIQMS[167.08]WTALR.A                  | 0.9916 | 13/ 22 | 2 | 1498.692 |
| IPI00414896 | 0.95 | 5.1  | 1 | 1 | 0.03 | R.VC[160.14]EDGPVFPYPPK.K                 | 0.9941 | 16/ 24 | 2 | 1504.092 |
| IPI00019275 | 0.96 | 5.7  | 1 | 2 | 0.05 | R.VVLGANGTYSC[160.14]LVR.N                | 0.9964 | 16/ 26 | 2 | 1509.492 |
| IPI00027350 | 0.94 | 18.2 | 1 | 1 | 0.04 | K.EGGLGPLNIPLADVT.R                       | 0.9278 | 21/ 30 | 2 | 1578.592 |
| IPI00012315 | 0.99 | 10.1 | 1 | 1 | 0.04 | R.ALIGATNPADAPPGTIR.G                     | 1      | 22/ 32 | 2 | 1634.592 |
| IPI00643920 | 0.99 | 3.9  | 1 | 1 | 0.04 | R.TVPFC[160.14]STFAAFFTR.A                | 0.9992 | 20/ 26 | 2 | 1651.792 |
| IPI00298971 | 0.99 | 3.1  | 1 | 2 | 0.07 | R.SIAQYWLG[C160.14]PAPGHL-                | 0.999  | 18/ 28 | 2 | 1669.792 |
| IPI00178767 | 0.99 | 3.8  | 1 | 1 | 0.04 | K.GSPVNSLFFVAPVTPVK.S                     | 1      | 24/ 32 | 2 | 1682.792 |
| IPI00218736 | 0.97 | 17.4 | 1 | 1 | 0    | K.DTTTPIQSM[147.19]M[147.19]C[160.14]QYL. | 0.98   | 17/ 26 | 2 | 1720.492 |
| IPI00246058 | 0.99 | 1.8  | 1 | 1 | 0.04 | R.SVIEQGGIQTVDQLIK.E                      | 1      | 23/ 30 | 2 | 1727.692 |
| IPI00179291 | 0.99 | 8.3  | 1 | 1 | 0.04 | R.GSLTFEPLTLVPIQTK.M                      | 1      | 22/ 30 | 2 | 1743.792 |
| IPI00029236 | 0.98 | 5.9  | 1 | 2 | 0.07 | K.ALSM[147.19]C[160.14]PPSPLGC[160.14]ELV | 0.9986 | 20/ 30 | 2 | 1776.392 |
| IPI00073772 | 0.99 | 5    | 1 | 1 | 0.04 | R.GTGELTQLLNSLC[160.14]TAVK.A             | 0.9999 | 15/ 32 | 2 | 1804.692 |
| IPI00027497 | 0.97 | 3.1  | 1 | 1 | 0.04 | K.TLAQLNPESLFIASK.T                       | 0.9972 | 23/ 32 | 2 | 1831.792 |
| IPI00026197 | 0.98 | 14.9 | 1 | 1 | 0.04 | G.DIVM[147.19]TQSPDSLAVSLGER.A            | 0.9996 | 27/ 34 | 2 | 1934.792 |



|             |      |      |   |   |      |                                             |        |        |   |          |
|-------------|------|------|---|---|------|---------------------------------------------|--------|--------|---|----------|
| IPI00216057 | 0.98 | 4.8  | 1 | 1 | 0.04 | R.LENYPIPEPGPNEVLLR.M                       | 0.9989 | 16/ 32 | 2 | 1950.992 |
| IPI00296922 | 0.95 | 0.9  | 1 | 3 | 0.1  | R.YLIFPNPVC[160.14]LEPGISYK.L               | 0.9843 | 27/ 32 | 2 | 2009.892 |
| IPI00300562 | 1    | 13.7 | 1 | 3 | 0.18 | R.YADDTFTPAFVSTVGIDFK.V                     | 0.9999 | 23/ 36 | 2 | 2094.992 |
| IPI00299699 | 0.97 | 7.1  | 1 | 1 | 0.04 | R.NPLFDHAALSAPLPAPSSPPALP.-                 | 0.9976 | 30/ 88 | 3 | 2281.092 |
| IPI00743194 | 0.97 | 21.2 | 1 | 1 | 0.04 | A.DIVM[147.19]TQTPLSLSVTPGQPASISC[160.14]   | 0.9973 | 29/ 92 | 3 | 2547.192 |
| IPI00022231 | 0.99 | 26.2 | 1 | 1 | 0.04 | R.HFNPVC[160.14]GSMD[147.19]STYANEC[160.14] | 0.9993 | 38/ 84 | 3 | 2655.892 |
| IPI00006114 | 0.96 | 6.9  | 1 | 1 | 0.03 | R.SSM[147.19]SPTTNVLLSPLSVATALSALSLGAEQ     | 0.9955 | 28/112 | 3 | 2862.292 |
| IPI00010796 | 0.98 | 5.9  | 1 | 3 | 0.1  | R.TGPAATLLPDGAAAESLVESSEVAVIGFFK.D          | 0.9911 | 33/116 | 3 | 2937.392 |
| IPI00013382 | 0.95 | 12.1 | 1 | 1 | 0.03 | Q.PNLDTCC[160.14]AFHEQPPELQKK.Q             | 0.9944 | 24/ 64 | 3 | 2054.792 |
| IPI00003935 | 0.99 | 12   | 1 | 1 | 0.04 | K.AM[147.19]GIM[147.19]NSFVNDIFER.I         | 0.9998 | 21/ 28 | 2 | 1775.592 |
| IPI00009650 | 0.97 | 6.2  | 1 | 2 | 0.06 | R.GLSTESILIPR.Q                             | 0.9302 | 15/ 20 | 2 | 1185.092 |
| IPI00021263 | 0.9  | 9    | 1 | 1 | 0.04 | K.SVTEQGAELSNEER.N                          | 0.9809 | 21/ 26 | 2 | 1548.492 |
| IPI00215914 | 0.99 | 6.1  | 1 | 1 | 0.04 | R.ILM[147.19]VGLDAAGK.T                     | 0.9993 | 18/ 20 | 2 | 1103.992 |
| IPI00002818 | 0.98 | 4.4  | 1 | 2 | 0.05 | R.LLC[160.14]GATLIAPR.W                     | 0.999  | 18/ 20 | 2 | 1185.892 |
| IPI00010896 | 0.93 | 6.4  | 1 | 1 | 0.03 | K.GVTFNVTTVDTK.R                            | 0.9924 | 15/ 22 | 2 | 1281.292 |
| IPI00289831 | 0.99 | 0.9  | 1 | 2 | 0.07 | R.SPQGLGAFTPVVR.Q                           | 0.9999 | 20/ 24 | 2 | 1328.692 |
| IPI00029658 | 0.99 | 4.7  | 1 | 1 | 0.04 | R.SVPSDIFQIQATTIYANTINTFR.I                 | 0.9998 | 28/ 88 | 3 | 2600.892 |
| IPI00017367 | 1    | 7.1  | 1 | 1 | 0.04 | K.APDFVYAPR.L                               | 0.9993 | 16/ 18 | 2 | 1183.892 |
| IPI00291866 | 0.99 | 5.1  | 1 | 2 | 0.07 | K.GVTSVSQIFHSPDLAIR.D                       | 0.9889 | 25/ 64 | 3 | 1828.392 |
| IPI00215997 | 0.98 | 6.3  | 1 | 1 | 0.04 | K.KDVLETFTVK.S                              | 0.9989 | 14/ 18 | 2 | 1179.592 |

|             |      |      |   |   |      |                                   |        |        |   |          |
|-------------|------|------|---|---|------|-----------------------------------|--------|--------|---|----------|
| IPI00000041 | 0.91 | 4.7  | 1 | 2 | 0.04 | K.TC[160.14]LLIVFSK.D             | 0.9896 | 14/ 16 | 2 | 1080.992 |
| IPI00033583 | 0.99 | 4    | 1 | 1 | 0.04 | R.ADLTGISPSPNLYLSK.I              | 0.9999 | 18/ 30 | 2 | 1675.792 |
| IPI00027255 | 0.99 | 8.7  | 1 | 1 | 0.04 | R.ALGQNPTNAEVLK.V                 | 0.9997 | 16/ 24 | 2 | 1354.292 |
| IPI00259102 | 0.96 | 4.9  | 1 | 1 | 0.03 | R.ALLSYDGLNQR.V                   | 0.9954 | 16/ 20 | 2 | 1249.592 |
| IPI00291136 | 0.94 | 2    | 1 | 1 | 0.03 | R.DTTPLNVLC[160.14]SPGIQVVSVGIK.D | 0.9934 | 28/ 80 | 3 | 2198.892 |
| IPI00022204 | 0.99 | 3    | 1 | 3 | 0.11 | R.GLVLSGVLHK.A                    | 0.9997 | 15/ 18 | 2 | 1022.192 |
| IPI00296286 | 0.99 | 6.9  | 1 | 1 | 0.04 | R.IGDTVTC[160.14]VC[160.14]QFK.C  | 0.9996 | 17/ 22 | 2 | 1427.692 |
| IPI00007058 | 0.91 | 4.5  | 1 | 1 | 0.03 | R.VTWDSTFC[160.14]AVNPK.F         | 0.9895 | 17/ 24 | 2 | 1524.692 |
| IPI00012011 | 0.96 | 6.7  | 1 | 1 | 0.04 | R.YALYDATYETK.E                   | 0.9965 | 15/ 20 | 2 | 1337.792 |
| IPI00024175 | 0.93 | 7.5  | 1 | 1 | 0.03 | R.LYQTDPSGTYHAWK.A                | 0.9926 | 22/ 52 | 3 | 1667.992 |
| IPI00028514 | 0.99 | 2.5  | 1 | 2 | 0.07 | K.GVILYSDPADYFAPGVK.S             | 0.9998 | 20/ 32 | 2 | 1811.692 |
| IPI00154742 | 0.98 | 26.5 | 1 | 1 | 0.18 | K.YAASSYLSLTPEQWK.S               | 0.9993 | 23/ 28 | 2 | 1743.792 |

\*the amino acid residues before and after the dot indicate the amino acids N- and C-terminal to that peptide's sequence

**Suppl. Doc 4: Prostate proteins with Protein Prophet Scores greater than 0.9 and have more than two unique peptide hits**

| protein        | protein probability | percent coverage | num unique peps | tot num peps | percent share of spectrum id's | description                                                                                   |
|----------------|---------------------|------------------|-----------------|--------------|--------------------------------|-----------------------------------------------------------------------------------------------|
| IPI00025415    | 1                   | 51.7             | 46              | 195          | 7.08                           | Semenogelin-2 precursor                                                                       |
| IPI00023020,IP |                     |                  |                 |              |                                | Isoform 1 of Semenogelin-1 precursor,Isoform 2 of                                             |
| I00414684      | 1                   | 56.7             | 39              | 184          | 6.7                            | Semenogelin-1 precursor                                                                       |
| IPI00221224    | 1                   | 34.6             | 31              | 178          | 8.11                           | Aminopeptidase N                                                                              |
| IPI00290396    | 1                   | 49.3             | 26              | 87           | 3.96                           | Protein-glutamine gamma-glutamyltransferase 4                                                 |
| IPI00247063    | 1                   | 29.9             | 17              | 45           | 2.14                           | Neprilysin                                                                                    |
| IPI00022977    | 1                   | 46.7             | 17              | 118          | 5.28                           | Creatine kinase B-type                                                                        |
| IPI00220301    | 1                   | 62.8             | 15              | 51           | 2.23                           | Peroxiredoxin-6                                                                               |
| IPI00299024    | 1                   | 72.6             | 14              | 29           | 1.23                           | Brain acid soluble protein 1                                                                  |
| IPI00218918    | 1                   | 39.4             | 13              | 45           | 1.95                           | Annexin A1                                                                                    |
| IPI00010471    | 1                   | 25.2             | 13              | 44           | 1.93                           | Plastin-2                                                                                     |
| IPI00027223    | 1                   | 27.1             | 13              | 34           | 1.49                           | Isocitrate dehydrogenase [NADP] cytoplasmic                                                   |
| IPI00018953    | 1                   | 17.9             | 12              | 36           | 1.65                           | Dipeptidyl peptidase 4                                                                        |
| IPI00021440,IP |                     |                  |                 |              |                                | Actin, cytoplasmic 2,Actin, cytoplasmic 1                                                     |
| I00021439      | 1                   | 47.7             | 11              | 77           | 4.56                           |                                                                                               |
| IPI00216057    | 1                   | 26.4             | 10              | 42           | 1.81                           | Sorbitol dehydrogenase                                                                        |
| IPI00329801    | 1                   | 37.9             | 9               | 43           | 1.58                           | Annexin A5                                                                                    |
| IPI00418169,IP |                     |                  |                 |              |                                | annexin A2 isoform 1,Annexin A2                                                               |
| I00455315      | 1                   | 23.7             | 8               | 14           | 0.61                           | fatty acid synthase,Fatty acid synthase                                                       |
| IPI00645907,IP |                     |                  |                 |              |                                | Isoform 1 of Heat shock cognate 71 kDa protein,Isoform 2 of Heat shock cognate 71 kDa protein |
| I00026781      | 1                   | 6.6              | 8               | 19           | 0.9                            |                                                                                               |
| IPI00003865,IP |                     |                  |                 |              |                                |                                                                                               |
| I00037070      | 1                   | 21.1             | 8               | 19           | 1.08                           |                                                                                               |
| IPI00025512    | 1                   | 51.7             | 8               | 12           | 0.53                           | Heat-shock protein beta-1                                                                     |
| IPI00746388,IP |                     |                  |                 |              |                                |                                                                                               |
| I00479359      | 1                   | 14               | 8               | 29           | 1.08                           | Ezrin,villin 2                                                                                |
| IPI00643932,IP |                     |                  |                 |              |                                | heat shock 70kDa protein 1B,heat shock 70kDa protein 1A,Heat shock 70 kDa protein 1           |
| I00514377,IPI0 |                     |                  |                 |              |                                |                                                                                               |
| 0304925        | 1                   | 18.7             | 8               | 31           | 1.58                           |                                                                                               |
| IPI00289983,IP |                     |                  |                 |              |                                | ACPP protein,Prostatic acid phosphatase precursor                                             |
| I00396434      | 1                   | 27.2             | 8               | 23           | 0.95                           | Heat shock protein HSP 90-alpha,Heat shock protein HSP 90-alpha 2                             |
| IPI00784295,IP |                     |                  |                 |              |                                |                                                                                               |
| I00382470      | 1                   | 20.7             | 7               | 13           | 0.56                           | Rab GDP dissociation inhibitor beta,GDP dissociation inhibitor 2                              |
| IPI00031461,IP |                     |                  |                 |              |                                |                                                                                               |
| I00640006      | 1                   | 20.5             | 7               | 22           | 0.98                           |                                                                                               |

|                                                                             |   |      |   |    |      |                                                                                                         |
|-----------------------------------------------------------------------------|---|------|---|----|------|---------------------------------------------------------------------------------------------------------|
| IPI00291262,IP<br>I00400826                                                 | 1 | 18   | 7 | 26 | 1.24 | Clusterin precursor,clusterin isoform 1                                                                 |
| IPI00479186,IP<br>I00784179                                                 | 1 | 18.5 | 7 | 18 | 0.7  | pyruvate kinase 3 isoform 1,58 kDa protein                                                              |
| IPI00007752                                                                 | 1 | 28.5 | 7 | 17 | 0.65 | Tubulin beta-2C chain                                                                                   |
| IPI00396485,IP<br>I00472724                                                 | 1 | 12.1 | 7 | 15 | 0.58 | Elongation factor 1-alpha 1,Eukaryotic translation elongation factor 1 alpha-like 3                     |
| IPI00063234,IP<br>I00219774                                                 | 1 | 17.5 | 6 | 15 | 0.68 | Hypothetical protein,cAMP-dependent protein kinase type II-alpha regulatory subunit                     |
| IPI00300562                                                                 | 1 | 37.9 | 6 | 33 | 1.95 | Ras-related protein Rab-3B                                                                              |
| IPI00219858,IP<br>I00016381                                                 | 1 | 23   | 6 | 16 | 1.07 | Isoform Short of Ras-related protein Rab-27A,Isoform Long of Ras-related protein Rab-27A                |
| IPI00177728                                                                 | 1 | 27.4 | 6 | 8  | 0.32 | Cytosolic nonspecific dipeptidase                                                                       |
| IPI00166768,IP<br>I00478908,IP<br>I00218343,IP<br>I00387144,IP<br>I00180675 | 1 | 24.1 | 5 | 14 | 0.52 | TUBA6 protein,50 kDa protein,Tubulin alpha-6 chain,Tubulin alpha-ubiquitous chain,Tubulin alpha-3 chain |
| IPI00784459,IP<br>I00012011                                                 | 1 | 35.8 | 5 | 8  | 0.34 | 24 kDa protein,Cofilin-1                                                                                |
| IPI00075248                                                                 | 1 | 43.2 | 5 | 12 | 0.46 | Calmodulin                                                                                              |
| IPI00166729                                                                 | 1 | 17.8 | 4 | 9  | 0.3  | alpha-2-glycoprotein 1, zinc                                                                            |
| IPI00219446                                                                 | 1 | 30.6 | 4 | 14 | 0.63 | Phosphatidylethanolamine-binding protein 1                                                              |
| IPI00334775,IP<br>I00414676                                                 | 1 | 15.1 | 4 | 6  | 0.35 | Hypothetical protein DKFZp761K0511,Heat shock protein HSP 90-beta                                       |
| IPI00219018                                                                 | 1 | 20.1 | 4 | 15 | 0.71 | Glyceraldehyde-3-phosphate dehydrogenase                                                                |
| IPI00465248                                                                 | 1 | 15.7 | 4 | 9  | 0.31 | enolase 1                                                                                               |
| IPI00019502                                                                 | 1 | 3.5  | 4 | 4  | 0.12 | Myosin-9                                                                                                |
| IPI00003269                                                                 | 1 | 17.8 | 4 | 16 | 0.81 | hypothetical protein LOC345651                                                                          |
| IPI00027350,IP<br>I00375400                                                 | 1 | 25   | 4 | 15 | 0.46 | Peroxisiredoxin-2,16 kDa protein                                                                        |
| IPI00397808                                                                 | 1 | 30.1 | 4 | 24 | 0.65 | PREDICTED: similar to ubiquitin and ribosomal protein S27a precursor                                    |

|                                                             |      |      |   |    |      |                                                                                                                                                                                                                                                                               |
|-------------------------------------------------------------|------|------|---|----|------|-------------------------------------------------------------------------------------------------------------------------------------------------------------------------------------------------------------------------------------------------------------------------------|
| IPI00738715,IP<br>I00643923,IPI0<br>0741537,IPI00<br>735915 | 0.93 | 5    | 4 | 4  | 0.04 | PREDICTED: hypothetical<br>protein LOC84726 isoform<br>7,PREDICTED: similar to<br>HLA-B associated transcript-<br>2 isoform a isoform<br>10,PREDICTED:<br>hypothetical protein<br>LOC84726 isoform<br>1,PREDICTED: similar to<br>HBxAg transactivated<br>protein 2 isoform 16 |
| IPI00216691                                                 | 1    | 31.7 | 3 | 4  | 0.19 | Profilin-1                                                                                                                                                                                                                                                                    |
| IPI00006212                                                 | 1    | 9.3  | 3 | 6  | 0.28 | Transmembrane protease,<br>serine 2 precursor                                                                                                                                                                                                                                 |
| IPI00215917,IP<br>I00215914                                 | 1    | 25.6 | 3 | 4  | 0.12 | ADP-ribosylation factor<br>3,ADP-ribosylation factor 1                                                                                                                                                                                                                        |
| IPI00032808                                                 | 1    | 34.7 | 3 | 25 | 1.57 | Ras-related protein Rab-3D                                                                                                                                                                                                                                                    |
| IPI00000816                                                 | 1    | 18.8 | 3 | 4  | 0.15 | 14-3-3 protein epsilon                                                                                                                                                                                                                                                        |
| IPI00015148,IP<br>I00640287,IPI0<br>0412525,IPI00<br>019345 | 1    | 7.6  | 3 | 8  | 0.34 | Ras-related protein Rap-1b<br>precursor,RAP1A, member<br>of RAS oncogene<br>family,PREDICTED: similar<br>to RAS related protein 1b<br>isoform 1,Ras-related<br>protein Rap-1A precursor                                                                                       |
| IPI00220766                                                 | 1    | 16.4 | 3 | 14 | 0.67 | Lactoylglutathione lyase                                                                                                                                                                                                                                                      |
| IPI00220271                                                 | 1    | 15.4 | 3 | 3  | 0.11 | Alcohol dehydrogenase<br>Carbonyl reductase<br>[NADPH] 1                                                                                                                                                                                                                      |
| IPI00295386                                                 | 1    | 20.7 | 3 | 6  | 0.25 | 14-3-3 protein sigma,SFN<br>protein                                                                                                                                                                                                                                           |
| IPI00013890,IP<br>I00411765                                 | 1    | 41.7 | 3 | 4  | 0.13 | Protein NDRG1,CDNA<br>FLJ38330 fis, clone<br>FCBBF3025280, highly<br>similar to NDRG1                                                                                                                                                                                         |
| IPI00022078,IP<br>I00183085,IPI0<br>0783586                 | 1    | 12.1 | 3 | 4  | 0.18 | PROTEIN,43 kDa protein                                                                                                                                                                                                                                                        |
| IPI00023006,IP<br>I00021428,IPI0<br>0515047                 | 1    | 33.1 | 3 | 14 | 2.17 | Actin, alpha cardiac,Actin,<br>alpha skeletal muscle,Actin,<br>alpha 1, skeletal muscle                                                                                                                                                                                       |
| IPI00549466,IP<br>I00419585,IPI0<br>0745933                 | 1    | 20.1 | 3 | 9  | 0.42 | peptidylprolyl isomerase A-<br>like,Peptidyl-prolyl cis-trans<br>isomerase A,18 kDa protein<br>Isoform 1 of Gamma-<br>glutamyltranspeptidase 1<br>precursor                                                                                                                   |
| IPI00018901                                                 | 1    | 8.8  | 3 | 5  | 0.08 | Isoform Long of Probable<br>phospholipid-transporting<br>ATPase IIA                                                                                                                                                                                                           |
| IPI00024368                                                 | 1    | 6    | 3 | 4  | 0.13 | Hypothetical protein                                                                                                                                                                                                                                                          |
| IPI00783704,IP<br>I00783792                                 | 1    | 10.3 | 3 | 5  | 0.65 | MGAM,192 kDa protein                                                                                                                                                                                                                                                          |
| IPI00745729,IP<br>I00305719                                 | 1    | 10.6 | 3 | 3  | 0.12 | 53 kDa protein,selenium<br>binding protein 1                                                                                                                                                                                                                                  |

|                                             |   |      |   |   |      |                                                                                                                                                    |
|---------------------------------------------|---|------|---|---|------|----------------------------------------------------------------------------------------------------------------------------------------------------|
| IPI00095891,IP<br>I00646491                 | 1 | 6.8  | 3 | 3 | 0.07 | guanine nucleotide binding protein, alpha stimulating activity polypeptide 1 isoform c,GNAS complex locus                                          |
| IPI00328178,IP<br>I00446294,IPIO<br>0651745 | 1 | 5    | 2 | 3 | 0.14 | Target of myb1-like protein 2,CDNA FLJ42340 fis, clone UTERU1000031, moderately similar to G.gallus tom-1B protein,target of myb1-like 2 isoform 1 |
| IPI00297037,IP<br>I00409585                 | 1 | 8.8  | 2 | 5 | 0.2  | Isoform 1 of Lipid phosphate phosphohydrolase 1,Isoform 2 of Lipid phosphate phosphohydrolase 1                                                    |
| IPI00220143<br>IPI00180776,IP<br>I00021263  | 1 | 9.4  | 2 | 3 | 0.59 | Maltase-glucoamylase, intestinal                                                                                                                   |
| IPI00104341                                 | 1 | 8.6  | 2 | 3 | 0.1  | 28 kDa protein,14-3-3 protein zeta\delta                                                                                                           |
| IPI00298547                                 | 1 | 10.1 | 2 | 5 | 0.19 | Epoxide hydrolase 2                                                                                                                                |
| IPI00465439                                 | 1 | 8.5  | 2 | 2 | 0.09 | Protein DJ-1                                                                                                                                       |
| IPI00292532                                 | 1 | 9.2  | 2 | 2 | 0.09 | Fructose-bisphosphate aldolase A                                                                                                                   |
| IPI00073772                                 | 1 | 8.3  | 2 | 2 | 0.09 | Antibacterial protein FALL-39 precursor                                                                                                            |
| IPI00298860,IP<br>I00736872                 | 1 | 3.7  | 2 | 3 | 0.13 | Fructose-1,6-bisphosphatase 1                                                                                                                      |
| IPI00294653                                 | 1 | 1.9  | 2 | 9 | 0.38 | Growth-inhibiting protein 12,PREDICTED: similar to lactotransferrin                                                                                |
| IPI00027341                                 | 1 | 9.2  | 2 | 5 | 0.23 | Protein C21orf5                                                                                                                                    |
| IPI00745868,IP<br>I00024095                 | 1 | 7.8  | 2 | 3 | 0.14 | Macrophage capping protein                                                                                                                         |
| IPI00749398,IP<br>I00413451                 | 1 | 7.4  | 2 | 6 | 0.24 | 36 kDa protein,Annexin A3                                                                                                                          |
|                                             |   |      |   |   |      | serine (or cysteine) proteinase inhibitor, clade B (ovalbumin), member 6,Hypothetical protein DKFZp686I04222                                       |

|                                                                             |      |      |   |    |      |                                                                                                                                                                                                                                                                                                                                                                                                                                                               |
|-----------------------------------------------------------------------------|------|------|---|----|------|---------------------------------------------------------------------------------------------------------------------------------------------------------------------------------------------------------------------------------------------------------------------------------------------------------------------------------------------------------------------------------------------------------------------------------------------------------------|
| IPI00736082,IP<br>I00383071,IPI0<br>0737313,IPI00<br>465028,IPI007<br>40392 | 1    | 12.9 | 2 | 4  | 0.17 | PREDICTED: similar to<br>Triosephosphate isomerase<br>(TIM) (Triose-phosphate<br>isomerase) isoform<br>5,RcTPI1<br>(Fragment),PREDICTED:<br>similar to Triosephosphate<br>isomerase (TIM) (Triose-<br>phosphate isomerase)<br>isoform 3,Triosephosphate<br>isomerase,PREDICTED:<br>similar to Triosephosphate<br>isomerase (TIM) (Triose-<br>phosphate isomerase)<br>isoform 6<br>Phosphoglycerate kinase,<br>testis<br>specific,Phosphoglycerate<br>kinase 1 |
| IPI00219568,IP<br>I00169383                                                 | 1    | 3.6  | 2 | 4  | 0.18 | Ras-related protein Rab-<br>2B,Ras-related protein Rab-<br>2A                                                                                                                                                                                                                                                                                                                                                                                                 |
| IPI00102896,IP<br>I00031169                                                 | 1    | 19.8 | 2 | 2  | 0.09 | Niban protein                                                                                                                                                                                                                                                                                                                                                                                                                                                 |
| IPI00328350                                                                 | 1    | 2.9  | 2 | 3  | 0.14 |                                                                                                                                                                                                                                                                                                                                                                                                                                                               |
| IPI00218836,IP<br>I00010182                                                 | 1    | 36.8 | 2 | 2  | 0.08 | Isoform 2 of Acyl-CoA-<br>binding protein,Endozepine<br>Macrophage migration<br>inhibitory factor                                                                                                                                                                                                                                                                                                                                                             |
| IPI00293276                                                                 | 1    | 28.1 | 2 | 30 | 1.41 |                                                                                                                                                                                                                                                                                                                                                                                                                                                               |
| IPI00070778,IP<br>I00016786                                                 | 1    | 8.9  | 2 | 6  | 0.28 | PREDICTED: similar to cell<br>division cycle 42 isoform<br>1,Isoform 2 of Cell division<br>control protein 42 homolog<br>precursor                                                                                                                                                                                                                                                                                                                            |
| IPI00007067,IP<br>I00479010                                                 | 1    | 20.3 | 2 | 5  | 0.19 | Golgi-associated plant<br>pathogenesis-related<br>protein 1,Chromosome 9<br>open reading frame 19                                                                                                                                                                                                                                                                                                                                                             |
| IPI00010491                                                                 | 1    | 17.1 | 2 | 3  | 0.47 | Ras-related protein Rab-<br>27B                                                                                                                                                                                                                                                                                                                                                                                                                               |
| IPI00004233,IP<br>I00301293                                                 | 0.99 | 1.4  | 2 | 2  | 0.08 | Isoform Long of Antigen KI-<br>67,antigen identified by<br>monoclonal antibody Ki-67<br>Isoform Cytoplasmic of<br>Glutathione reductase,<br>mitochondrial<br>precursor,Isoform<br>Mitochondrial of<br>Glutathione reductase,<br>mitochondrial precursor                                                                                                                                                                                                       |
| IPI00759575,IP<br>I00016862                                                 | 0.99 | 8.4  | 2 | 2  | 0.06 |                                                                                                                                                                                                                                                                                                                                                                                                                                                               |
| IPI00160290                                                                 | 0.98 | 3.7  | 2 | 3  | 0.09 | B-cell lymphoma 9 protein                                                                                                                                                                                                                                                                                                                                                                                                                                     |

|                             |      |      |   |   |      |                                                                                                                                                                                                                                                                       |
|-----------------------------|------|------|---|---|------|-----------------------------------------------------------------------------------------------------------------------------------------------------------------------------------------------------------------------------------------------------------------------|
| IPI00220993,IP<br>I00306667 | 0.95 | 11.5 | 2 | 3 | 0.07 | Isoform CNPI of 2',3'-cyclic-<br>nucleotide 3'-<br>phosphodiesterase,Isoform<br>CNPII of 2',3'-cyclic-<br>nucleotide 3'-<br>phosphodiesterase<br>Guanine nucleotide-binding<br>protein alpha-14<br>subunit,Guanine nucleotide-<br>binding protein subunit<br>alpha-11 |
| IPI00000695,IP<br>I00305551 | 0.93 | 12.1 | 2 | 3 | 0.05 |                                                                                                                                                                                                                                                                       |



**Suppl. doc 5. Integrative analysis of EPS proteins with other**

| <b>protein (IPI number)</b> | <b>Go Symbol</b> | <b>Found in prostasomes</b> | <b>identified as down regulated in oncomine</b> | <b>identified as up regulated in oncomine</b> | <b>Prostate enrichment scores</b> | <b>SingalP prediction</b> |
|-----------------------------|------------------|-----------------------------|-------------------------------------------------|-----------------------------------------------|-----------------------------------|---------------------------|
| IPI00434943                 | KLK2             | No                          | 2                                               | 3                                             | 9.24                              | Yes                       |
| IPI00010858                 | KLK3             | No                          | 3                                               | 4                                             | 8.79                              | Yes                       |
| IPI00414609                 | MSMB             | No                          |                                                 |                                               | 7.25                              | Yes                       |
| IPI00023020                 | SEMG1            | Yes                         |                                                 |                                               | 6.41                              | Yes                       |
| IPI00022429                 | ORM1             | No                          |                                                 |                                               | 6.02                              | Yes                       |
| IPI00465248                 | ENO1             | Yes                         | 0                                               | 1                                             | 5.29                              | No                        |
| IPI00007752                 | TUBB2C           | Yes                         |                                                 |                                               | 5.25                              | No                        |
| IPI00396434                 | ACPP             | Yes                         |                                                 |                                               | 5.12                              | Yes                       |
| IPI00025415                 | SEMG2            | Yes                         | 0                                               | 2                                             | 4.91                              | Yes                       |
| IPI00025447                 | EEF1A1           | No                          |                                                 |                                               | 4.32                              | No                        |
| IPI00010471                 | LCP1             | Yes                         | 1                                               | 6                                             | 3.91                              | No                        |
| IPI00456429                 | UBA52            | No                          | 2                                               | 4                                             | 3.46                              | No                        |
| IPI00022418                 | FN1              | No                          |                                                 |                                               | 3.32                              | Yes                       |
| IPI00027230                 | TRA1             | No                          |                                                 |                                               | 3.32                              | Yes                       |
| IPI00027462                 | S100A9           | No                          |                                                 |                                               | 3.17                              | No                        |
| IPI00021440                 | ACTG1            | Yes                         | 0                                               | 3                                             | 3.00                              | No                        |
| IPI00219682                 | STOM             | No                          |                                                 |                                               | 2.81                              | Signal anchor             |
| IPI00247063                 | MME (CD10)       | Yes                         |                                                 |                                               | 2.32                              | Signal anchor             |
| IPI00177728                 | CNDP2            | Yes                         | 0                                               | 1                                             | 2.00                              | No                        |
| IPI00219018                 | GAPDH            | Yes                         |                                                 |                                               | 2.00                              | No                        |
| IPI00479186                 | PKM2             | Yes                         |                                                 |                                               | 2.00                              | No                        |
| IPI00745161                 | STEAP4           | No                          |                                                 |                                               | 1.74                              | No                        |
| IPI00553177                 | SERPINA1         | No                          | 0                                               | 1                                             | 1.58                              | Yes                       |
| IPI00018953                 | DPP4(CD26)       | Yes                         |                                                 |                                               | 1.19                              | Yes                       |
| IPI00022977                 | CKB              | Yes                         |                                                 |                                               | 1.17                              | No                        |
| IPI00306543                 | GDF15            | No                          | 0                                               | 6                                             |                                   | Yes                       |
| IPI00299086                 | SDCBP            | No                          | 1                                               | 5                                             |                                   | No                        |
| IPI00031461                 | GDI2             | Yes                         | 1                                               | 4                                             |                                   | No                        |
| IPI00027223                 | IDH1             | Yes                         | 2                                               | 3                                             |                                   | No                        |
| IPI00026259                 | AGA              | No                          | 0                                               | 3                                             |                                   | Yes                       |
| IPI00022431                 | AHSG             | No                          | 2                                               | 3                                             |                                   | Yes                       |
| IPI00741408                 | DEFA1            | No                          | 0                                               | 3                                             |                                   | Yes                       |
| IPI00298497                 | FGB              | No                          | 0                                               | 3                                             |                                   | Yes                       |
| IPI00555812                 | GC               | No                          | 1                                               | 3                                             |                                   | Yes                       |
| IPI00032328                 | KNG1             | No                          | 1                                               | 3                                             |                                   | Yes                       |
| IPI00236556                 | MPO              | No                          | 1                                               | 3                                             |                                   | Yes                       |
| IPI00032179                 | SERPINC1         | No                          | 1                                               | 3                                             |                                   | Yes                       |
| IPI00018901                 | GGT1(CD224)      | Yes                         | 0                                               | 2                                             |                                   | Yes                       |
| IPI00293276                 | MIF              | Yes                         | 0                                               | 2                                             |                                   | No                        |
| IPI00022974                 | PIP              | No                          | 1                                               | 2                                             |                                   | Yes                       |
| IPI00298547                 | PARK7            | Yes                         | 0                                               | 2                                             |                                   | No                        |
| IPI00032220                 | AGT              | No                          | 1                                               | 2                                             |                                   | Yes                       |
| IPI00022229                 | APOB             | No                          | 0                                               | 2                                             |                                   | Yes                       |
| IPI00298828                 | APOH             | No                          | 1                                               | 2                                             |                                   | Yes                       |
| IPI00215983                 | CA1              | No                          | 0                                               | 2                                             |                                   | No                        |
| IPI00218414                 | CA2              | No                          | 0                                               | 2                                             |                                   | No                        |

|             |                    |     |   |   |               |
|-------------|--------------------|-----|---|---|---------------|
| IPI00219713 | FGG                | No  | 2 | 2 | Yes           |
| IPI00478493 | HP                 | No  | 0 | 2 | Yes           |
| IPI00514159 | ITIH2              | No  | 0 | 2 | Yes           |
| IPI00655954 | PDGFA              | No  | 0 | 2 | Yes           |
| IPI00004573 | PIGR               | No  | 2 | 2 | Yes           |
| IPI00022432 | TTR                | No  | 0 | 2 | Yes           |
| IPI00643525 | C4A                | No  | 1 | 2 | Yes           |
| IPI00219825 | PSAP               | No  | 1 | 2 | Yes           |
| IPI00513699 | SERPIN6            | No  | 0 | 1 | No            |
| IPI00021841 | APOA1              | No  | 0 | 1 | Yes           |
| IPI00021854 | APOA2              | No  | 0 | 1 | Yes           |
| IPI00414018 | C8A                | No  | 0 | 1 | Yes           |
| IPI00465436 | CAT                | No  | 0 | 1 | No            |
| IPI00410714 | HBA2               | No  | 0 | 1 | No            |
| IPI00022488 | HPX                | No  | 0 | 1 | Yes           |
| IPI00022371 | HRG                | No  | 0 | 1 | Yes           |
| IPI00401776 | MUC6               | No  | 0 | 1 | Yes           |
| IPI00301579 | NPC2               | No  | 0 | 1 | Yes           |
| IPI00759575 | GSR                | Yes |   |   | Yes           |
| IPI00549413 | ANXA1              | No  |   |   | No            |
| IPI00221224 | ANPEP(CD13)        | Yes |   |   | Signal anchor |
| IPI00166729 | AZGP1              | Yes |   |   | Yes           |
| IPI00295386 | CBR1               | Yes |   |   | No            |
| IPI00291262 | CLU                | Yes |   |   | Yes           |
| IPI00032808 | RAB3D              | Yes |   |   | No            |
| IPI00219858 | RAB27A             | Yes |   |   | No            |
| IPI00216691 | PFN1               | Yes |   |   | No            |
| IPI00294653 | DOPEY2             | Yes |   |   | No            |
| IPI00000816 | YWHAE              | Yes |   |   | No            |
| IPI00759663 | PRDX5              | No  |   |   | Yes           |
| IPI00003865 | HSPA8              | Yes |   |   | No            |
| IPI00478003 | A2M                | No  |   |   | Yes           |
| IPI00437751 | ACE(CD143)         | No  |   |   | Yes           |
| IPI00745872 | ALB                | No  |   |   | Yes           |
| IPI00029260 | CD14               | No  |   |   | Yes           |
| IPI00641900 | CEACAM1(CD6<br>6a) | No  |   |   | Yes           |
| IPI00027412 | CEACAM6(CD6<br>6c) | No  |   |   | Yes           |
| IPI00639937 | CFB                | No  |   |   | Yes           |
| IPI00029739 | CFH                | No  |   |   | Yes           |
| IPI00017601 | CP                 | No  |   |   | Yes           |
| IPI00032293 | CST3               | No  |   |   | Yes           |
| IPI00032325 | CSTA               | No  |   |   | No            |
| IPI00242956 | FCGBP              | No  |   |   | Yes           |
| IPI00654755 | HBB                | No  |   |   | No            |
| IPI00473011 | HBD                | No  |   |   | No            |
| IPI00220706 | HBG1               | No  |   |   | No            |
| IPI00014540 | HOXB4              | No  |   |   | No            |
| IPI00743064 | LCN2               | No  |   |   | Yes           |
| IPI00023673 | LGALS3BP           | No  |   |   | Yes           |
| IPI00298860 | LTF                | Yes |   |   | Yes           |
| IPI00022255 | OLFM4              | No  |   |   | Yes           |
| IPI00011571 | PDIA2              | No  |   |   | No            |

|                    |            |     |           |
|--------------------|------------|-----|-----------|
| IPI00642548        | PHGDH      | No  | No        |
| IPI00000874        | PRDX1      | No  | No        |
| IPI00218130        | PYGM       | No  | No        |
| IPI00007047        | S100A8     | No  | No        |
| IPI00550991        | SERPINA3   | No  | Yes       |
| IPI00007221        | SERPINA5   | No  | Yes       |
| IPI00027444        | SERPINB1   | No  | No        |
| IPI00022463        | TF         | No  | Yes       |
| IPI00032292        | TIMP1      | No  | Yes       |
| IPI00746832        | TPI1       | No  | No        |
| IPI00022895        | A1BG       | No  | Yes       |
| IPI00164623        | C3         | No  | Yes       |
| IPI00297444        | CD177      | No  | Yes       |
| IPI00736872        | LTF        | Yes | No        |
| IPI00784830        |            | No  | Yes       |
| <u>IPI00747115</u> | <u>HBB</u> | No  | <u>No</u> |
