# Supplementary material
Source: PubMed Central journal article supplement (PMC2886281)
Supplement: NIHMS200843-supplement-Suppl__Doc_6.pdf [file NIHMS200843-supplement-Suppl__Doc_6.pdf]

## Suppl. Doc 6. Different PSA peptides identified by MS in the EPS

| precursor<br>ion charge | peptide sequence                       | Times of<br>peptides<br>identified | nsp<br>adjusted<br>probability<br>* | initial<br>probability |
|-------------------------|----------------------------------------|------------------------------------|-------------------------------------|------------------------|
| 2                       | AVCGGVLVHPQWVLT                        | 5                                  | 1                                   | 0.98                   |
| 2                       | AVCGGVLVHPQWVLT                        | 5                                  | 1                                   | 0.98                   |
| 2                       | CAQVHPQK                               | 4                                  | 1                                   | 0.99                   |
| 3                       | DLHVISNDVCAQVHPQK                      | 4                                  | 1                                   | 1                      |
| 2                       | IVGGWECEK                              | 5                                  | 0.93                                | 0.68                   |
| 3                       | KLQCVDLHVISNDVCAQVHPQ                  | 4                                  | 0.92                                | 0.66                   |
| 3                       | LHVISNDVCAQVHPQK                       | 4                                  | 1                                   | 0.98                   |
| 2                       | LQCVDLHV                               | 4                                  | 0.76                                | 0.46                   |
| 2                       | LQCVDLHVI                              | 4                                  | 0.99                                | 0.97                   |
| 2                       | LQCVDLHVISN                            | 4                                  | 0.95                                | 0.74                   |
| 3                       | LQCVDLHVISNDVCAQVHPQ                   | 4                                  | 1                                   | 1                      |
| 2                       | LSEPAELTDAVK                           | 4                                  | 1                                   | 1                      |
| 2                       | PAELTDAVK                              | 8                                  | 1                                   | 0.99                   |
| 3                       | PGDDSSHDLM[147]LLR                     | 4                                  | 1                                   | 1                      |
| 2                       | STCSGDSGGPLVCNGVLQGI                   | 3                                  | 1                                   | 1                      |
| 2                       | SVILLGR                                | 4                                  | 0.8                                 | 0.5                    |
| 3                       | VDLHVISNDVCAQVHPQK                     | 4                                  | 1                                   | 1                      |
| 2                       | VM[147]DLPTQEPA                        | 4                                  | 0.9                                 | 0.6                    |
| 2                       | VM[147]DLPTQEPALGT                     | 4                                  | 0.88                                | 0.58                   |
| 2                       | VM[147]DLPTQEPALGTT                    | 4                                  | 0.99                                | 0.95                   |
| 2                       | VM[147]DLPTQEPALGTTTCY                 | 4                                  | 1                                   | 1                      |
| 3                       | VM[147]DLPTQEPALGTTTCYASGWGSIEPEEF     | 3                                  | 1                                   | 1                      |
| 3                       | VM[147]DLPTQEPALGTTTCYASGWGSIEPEEFL    | 3                                  | 0.77                                | 0.47                   |
| 3                       | VM[147]DLPTQEPALGTTTCYASGWGSIEPEEFLTPK | 3                                  | 1                                   | 1                      |
| 2                       | VMDLPTQEPALGTTTCY                      | 4                                  | 1                                   | 1                      |
| 2                       | WIKDTIVANP                             | 3                                  | 0.94                                | 0.71                   |

\*nsp, number of sibling peptides
